# Supplementary material for: How intramolecular hydrogen bonding (IHB) controls the C–ON bond homolysis in alkoxyamines
Source: Royal Society of Chemistry journal article supplement (doi:10.1039/c7ob02223a), 2017-01-01
Supplement: c7ob02223a2.pdf [file c7ob02223a2.pdf]

## Supporting Information

### How Intramolecular Hydrogen Bonding (IHB) Controls the C—ON Bond Homolysis in Alkoxyamines.

G rard Audran<sup>\*1</sup>, Raphael Bikanga,<sup>2</sup> Paul Br mond,<sup>1</sup> Mariya Edeleva,<sup>3</sup> Jean-Patrick Joly,<sup>1</sup> Sylvain R. A. Marque<sup>\*1,3</sup>, Paulin Nkolo,<sup>1</sup> and Val rie Roubaud<sup>1</sup>

<sup>1</sup> Aix Marseille Univ, CNRS, ICR, UMR 7273, Case 551, Avenue Escadrille Normandie-Niemen, 13397 Marseille Cedex 20 France

<sup>2</sup> Laboratoire de Substances Naturelles et de Synth se Organometalliques Universit  des Sciences et Techniques de Masuku B.P. 943 Franceville, Gabon

<sup>3</sup> N. N. Vorozhtsov Novosibirsk Institute of Organic Chemistry, Pr. Lavrentjeva 9, 630090 Novosibirsk, Russia.

E-mail: sylvain.marque@univ-amu.fr, g.audran@univ-amu.fr

\* to whom correspondence should be sent

|                                                                                             |       |
|---------------------------------------------------------------------------------------------|-------|
| Characterization ( <sup>1</sup> H and <sup>13</sup> C NMR, and HRMS) of <b>2b</b>           | SI-2  |
| Characterization (HRMS) of <b>2•</b>                                                        | SI-4  |
| Characterization ( <sup>1</sup> H and <sup>13</sup> C NMR) of <i>RS/SR-2</i>                | SI-5  |
| Characterization ( <sup>1</sup> H NMR) of <i>RS/SR-2'</i>                                   | SI-6  |
| Characterization ( <sup>1</sup> H NMR) of <i>RS/SR-2''</i>                                  | SI-7  |
| Characterization ( <sup>1</sup> H and <sup>13</sup> C NMR) of <i>RR/SS-2</i>                | SI-8  |
| Characterization ( <sup>1</sup> H NMR) of <i>RR/SS-2'</i>                                   | SI-9  |
| Characterization ( <sup>1</sup> H NMR) of <i>RR/SS-2''</i>                                  | SI-10 |
| Characterization (HRMS) of <i>RR/SS-2</i> and <i>RS/SR-2</i>                                | SI-11 |
| Characterization ( <sup>1</sup> H and <sup>13</sup> C NMR, and HRMS) of <i>RS/SR-4</i>      | SI-13 |
| Characterization ( <sup>1</sup> H and <sup>13</sup> C NMR, HRMS, and XRD) of <i>RR/SS-4</i> | SI-14 |
| Characterization ( <sup>1</sup> H and <sup>13</sup> C NMR, and HRMS) of <i>RS/SR-5</i>      | SI-17 |
| Characterization ( <sup>1</sup> H and <sup>13</sup> C NMR, and HRMS) of <i>RR/SS-5</i>      | SI-18 |
| Characterization (HRMS) of <i>RR/SS-5</i> and <i>RS/SR-5</i>                                | SI-19 |
| Characterization ( <sup>1</sup> H and <sup>13</sup> C NMR, and HRMS) of <b>6b</b>           | SI-20 |
| Characterization ( <sup>1</sup> H and <sup>13</sup> C NMR, HRMS, and XRD) of <i>RS/SR-4</i> | SI-22 |
| Characterization ( <sup>1</sup> H and <sup>13</sup> C NMR, and HRMS) of <i>RR/SS-4</i>      | SI-25 |
| Characterization ( <sup>1</sup> H and <sup>13</sup> C NMR, and HRMS) of <i>RS/SR-7</i>      | SI-27 |
| Characterization ( <sup>1</sup> H and <sup>13</sup> C NMR, and HRMS) of <i>RR/SS-7</i>      | SI-29 |
| Figure SI1.                                                                                 | SI-31 |
| Figure SI2.                                                                                 | SI-32 |
| Figure SI3.                                                                                 | SI-33 |
| Figure SI4.                                                                                 | SI-34 |
| Figure SI5. Gradient profile for the purification using Reveleris® machine.                 | SI-35 |
| Free motions in the nitroxyl fragment.                                                      | SI-36 |
| Influence of IHB on <i>k<sub>d</sub></i> .                                                  | SI-37 |
| IHB in alkoxyamines.                                                                        | SI-38 |
| Determination of <i>pK<sub>a</sub></i>                                                      | SI-39 |
| DFT calculations                                                                            | SI-40 |
| References                                                                                  | SI-72 |

Diethyl (1-((1-((tert-butyldimethylsilyl)oxy)-2-methylpropan-2-yl)amino)-2,2-dimethylpropyl) phosphonate (**2b**)

$^1\text{H}$  NMR ( $\text{CDCl}_3$ , 300 MHz):

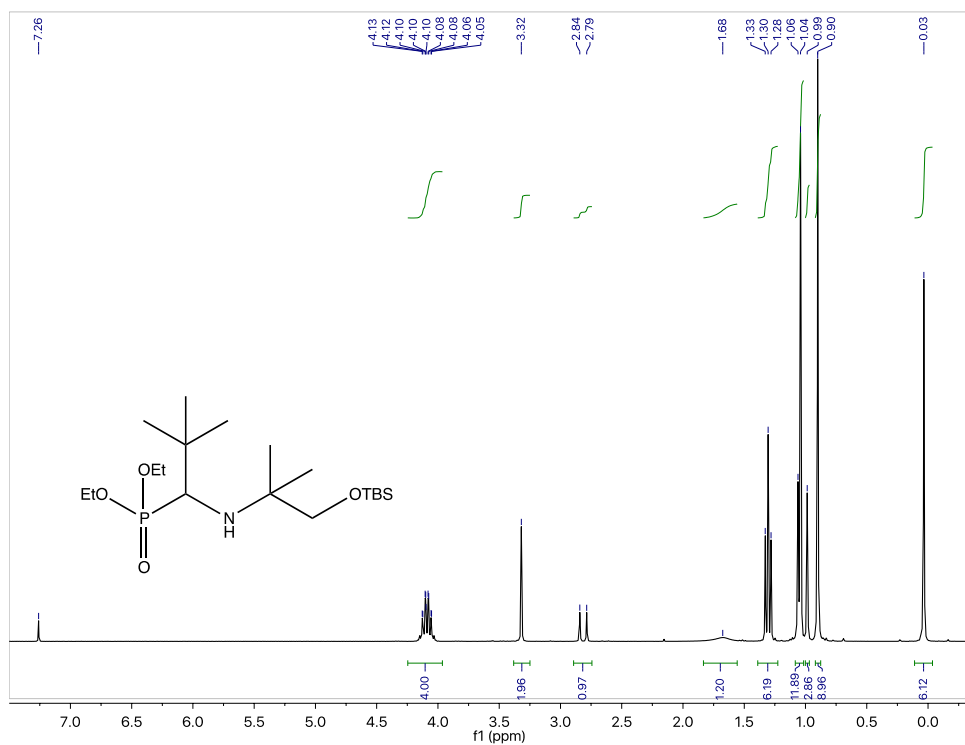

**2b**  $^{13}\text{C}$  NMR ( $\text{CDCl}_3$ , 75 MHz):

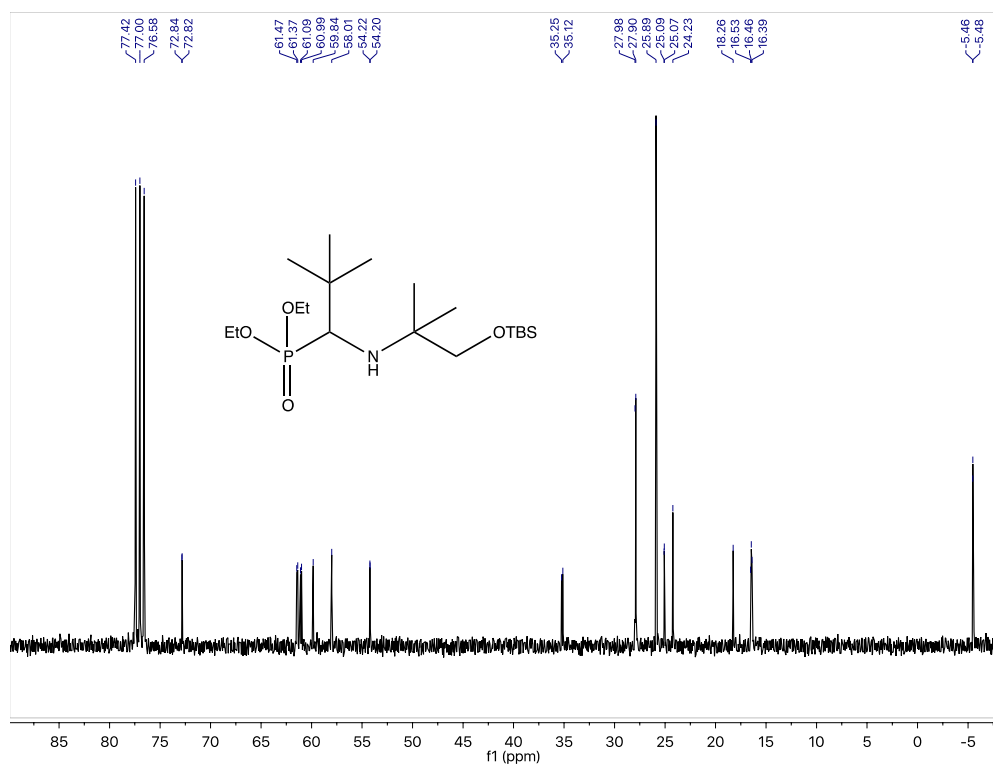

**2b** HRMS

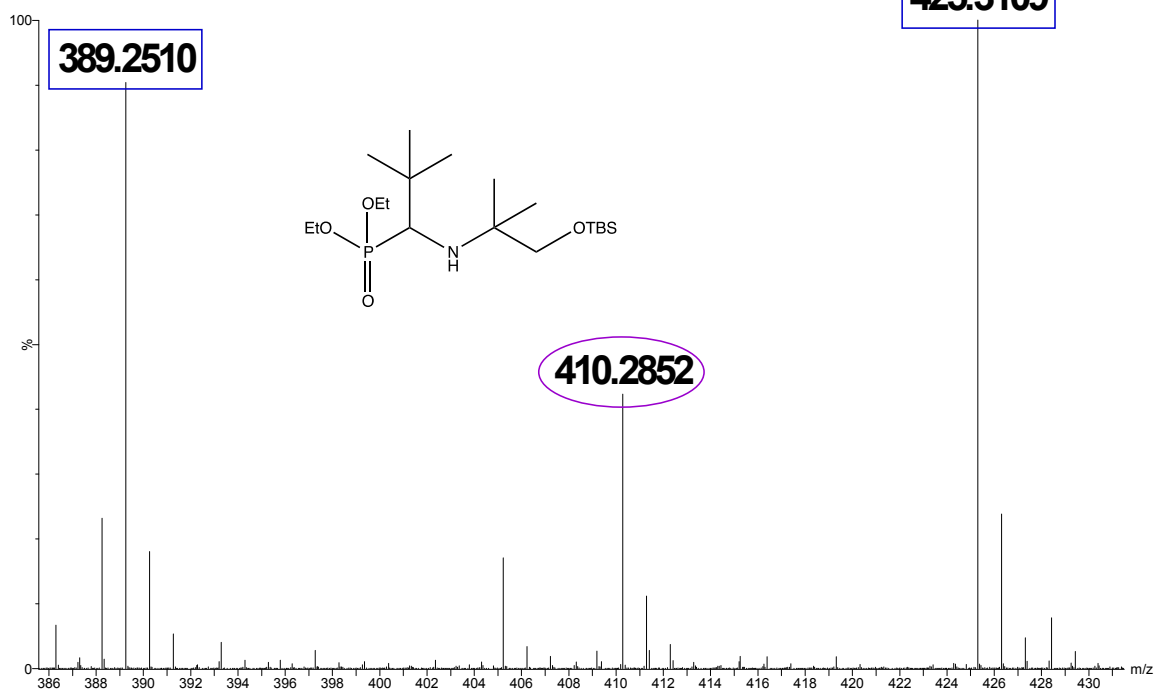

*1-(Diethoxyphosphoryl)-2,2-dimethylpropyl 2-(tert-butyl dimethylsilyloxy)-1,1-dimethylethyl Nitroxide (2•)*

2• HRMS

JP359\_MEX1\_copy 6 (0.120).AM2 (Ar,18000.0,0.00,0.00); Cm (1:10)

TOF MS ES+  
2.15e6

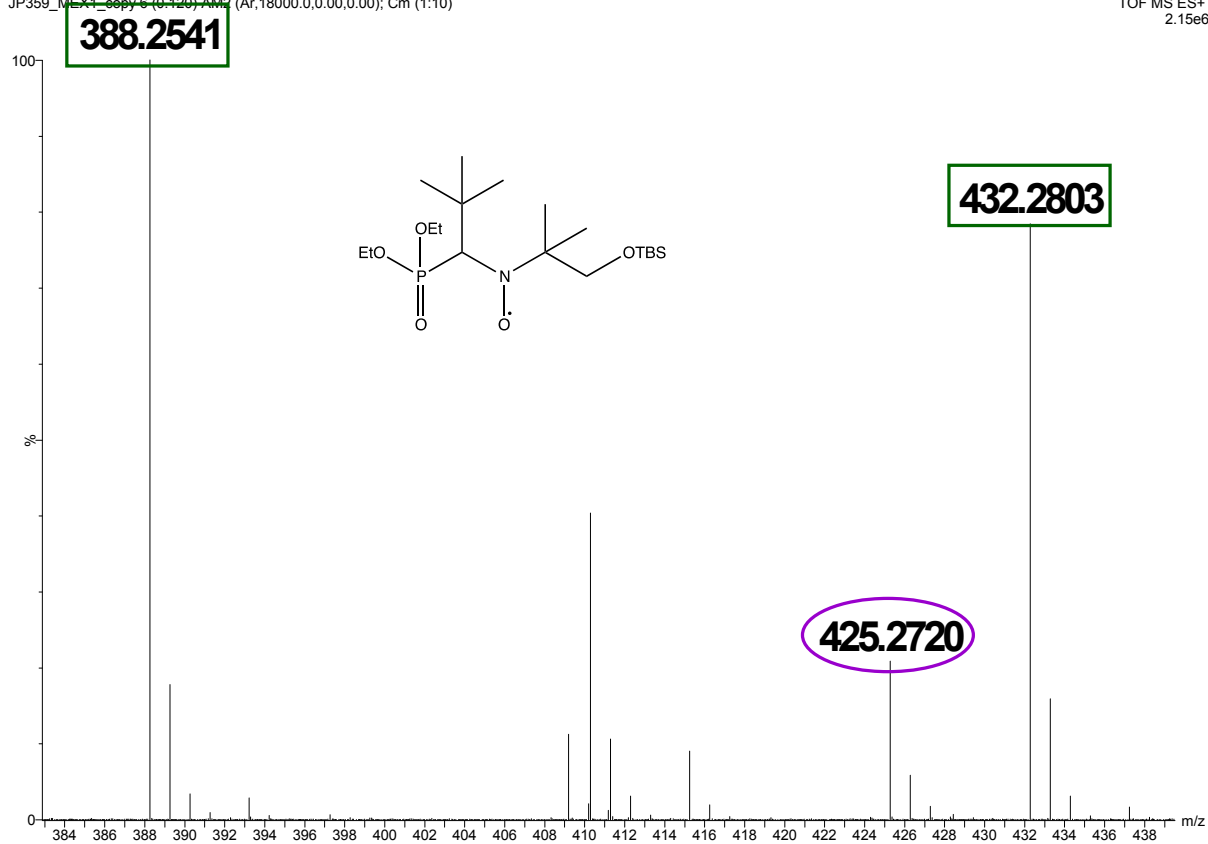

Diethyl(1-((1-((tert-butyl dimethylsilyl)oxy)-2-methylpropan-2-yl)(1-phenylethoxy)amino)-2,2-dimethylpropyl)phosphonate (**2, 2', 2''**)  
*RS/SR-2* <sup>1</sup>H NMR (CDCl<sub>3</sub>, 300 MHz):

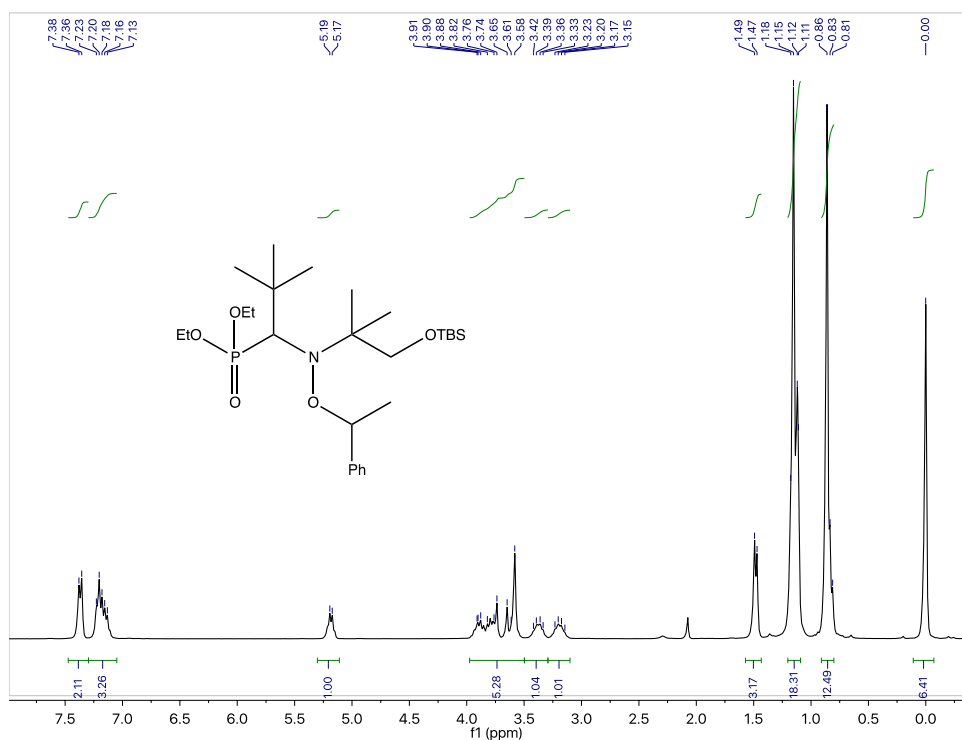

*RS/SR-2* <sup>13</sup>C NMR (CDCl<sub>3</sub>, 75 MHz):

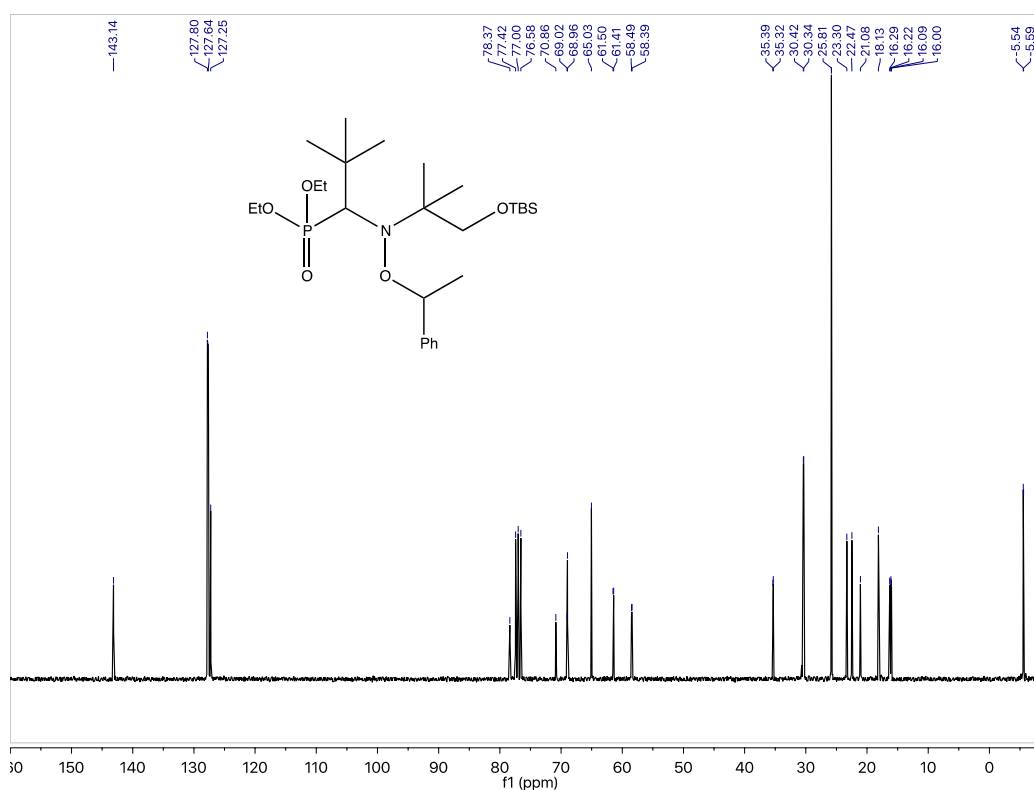

***RS/SR-2'*** <sup>1</sup>H NMR (CDCl<sub>3</sub>, 300 MHz):

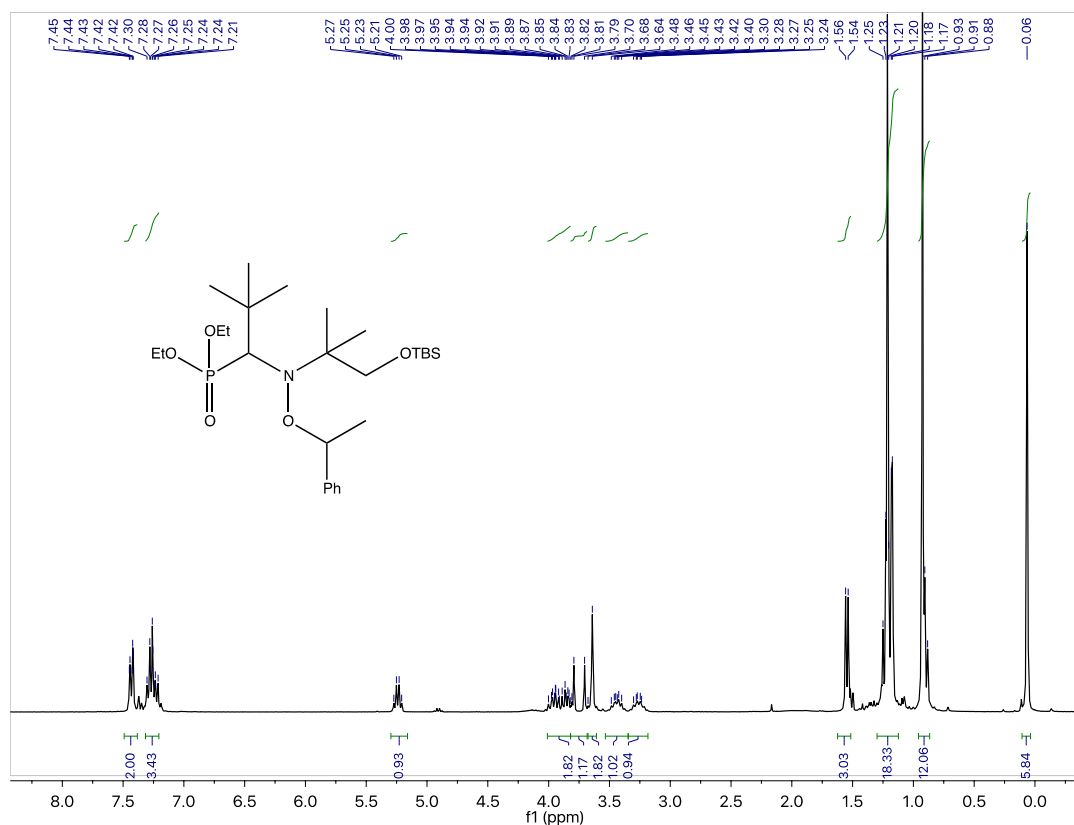

**RS/SR-2''** <sup>1</sup>H NMR (CDCl<sub>3</sub>, 300 MHz):

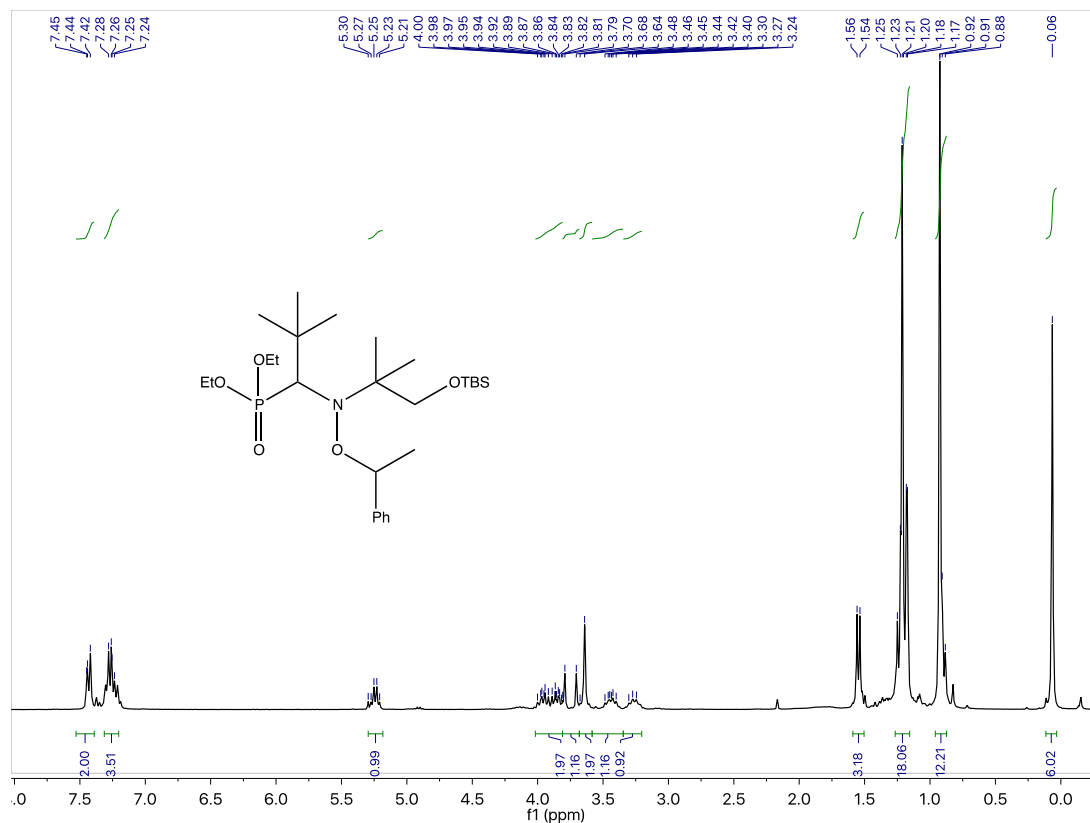

***RR/SS-2***  $^1\text{H}$  NMR ( $\text{CDCl}_3$ , 300 MHz):

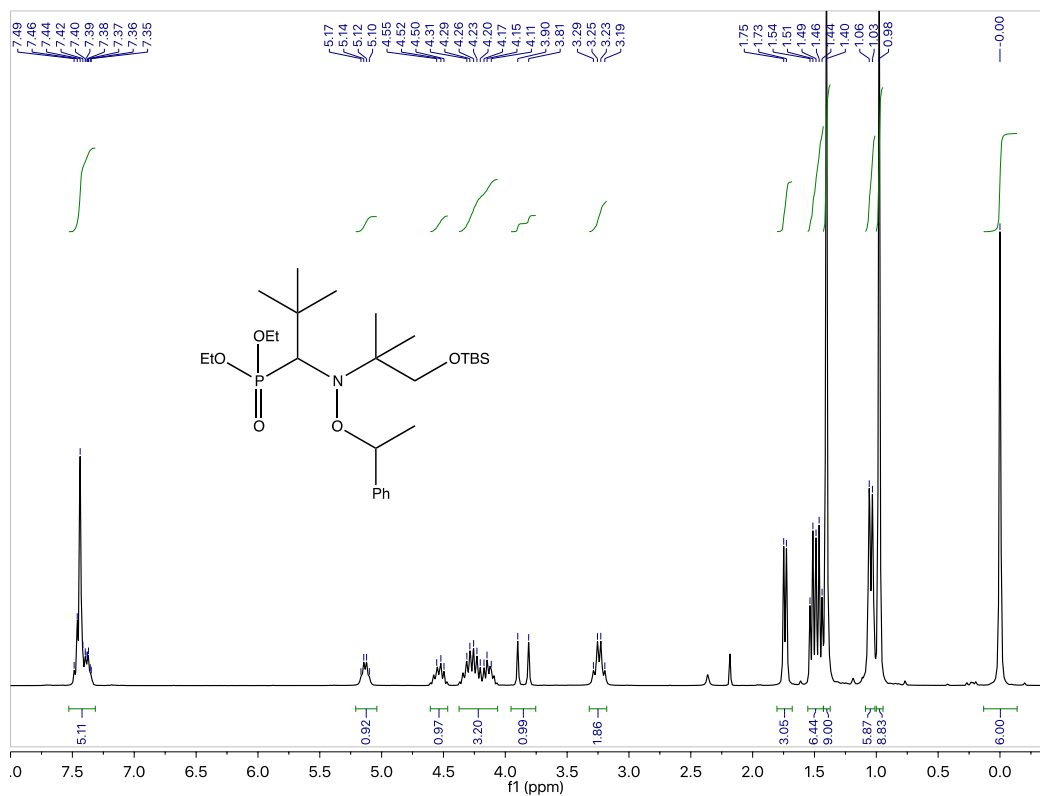

***RR/SS-2***  $^{13}\text{C}$  NMR ( $\text{CDCl}_3$ , 75 MHz):

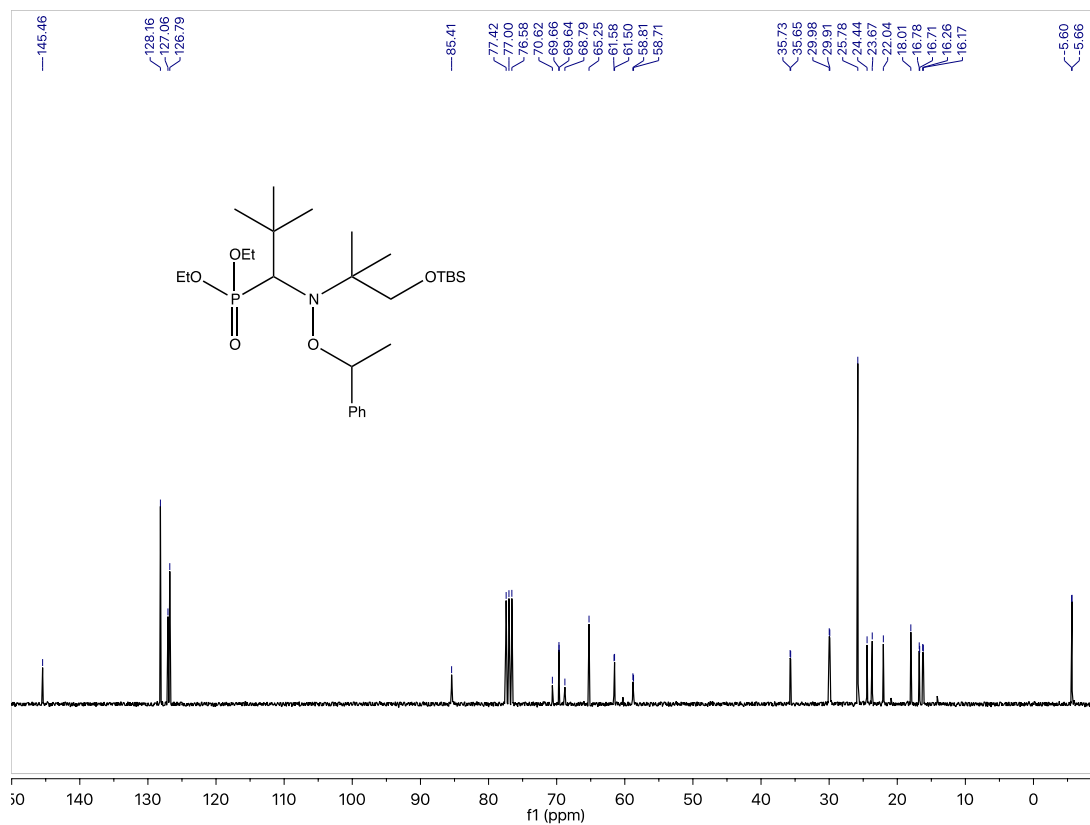



***RR/SS-2'*** <sup>1</sup>H NMR (CDCl<sub>3</sub>, 300 MHz):

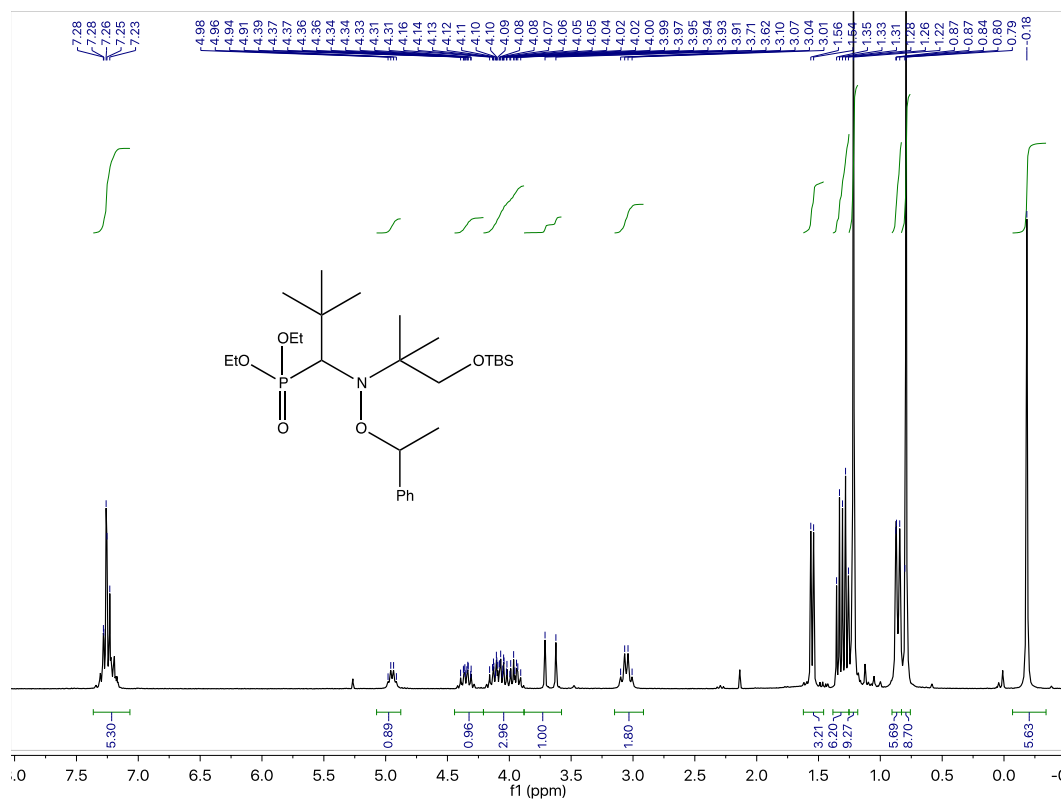

*RR/SS-2''*  $^1\text{H}$  NMR ( $\text{CDCl}_3$ , 400 MHz):

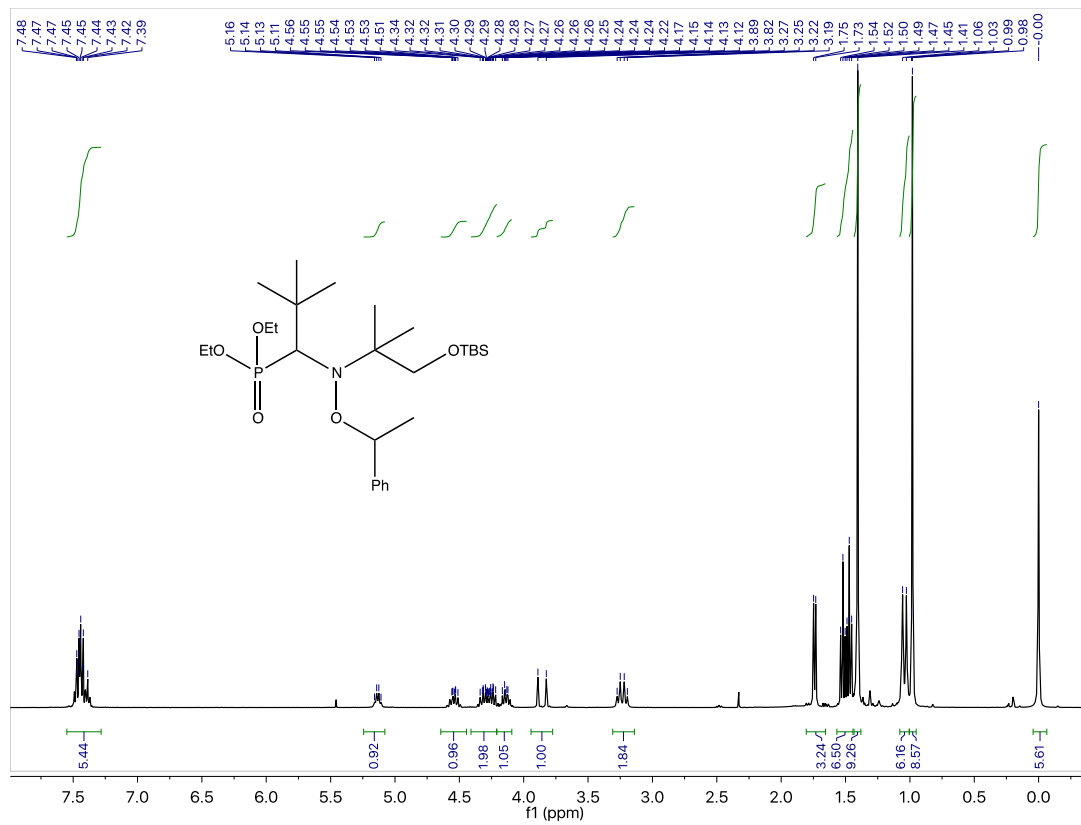

# RS/SR-2 and RR/SS-2 mixture HRMS

JP360DIA\_MEX3\_copy.6(0.120).AM2 (Ar,18000.0,0.00,0.00); Cm (1:10)

TOF MS ES+  
2.96e6

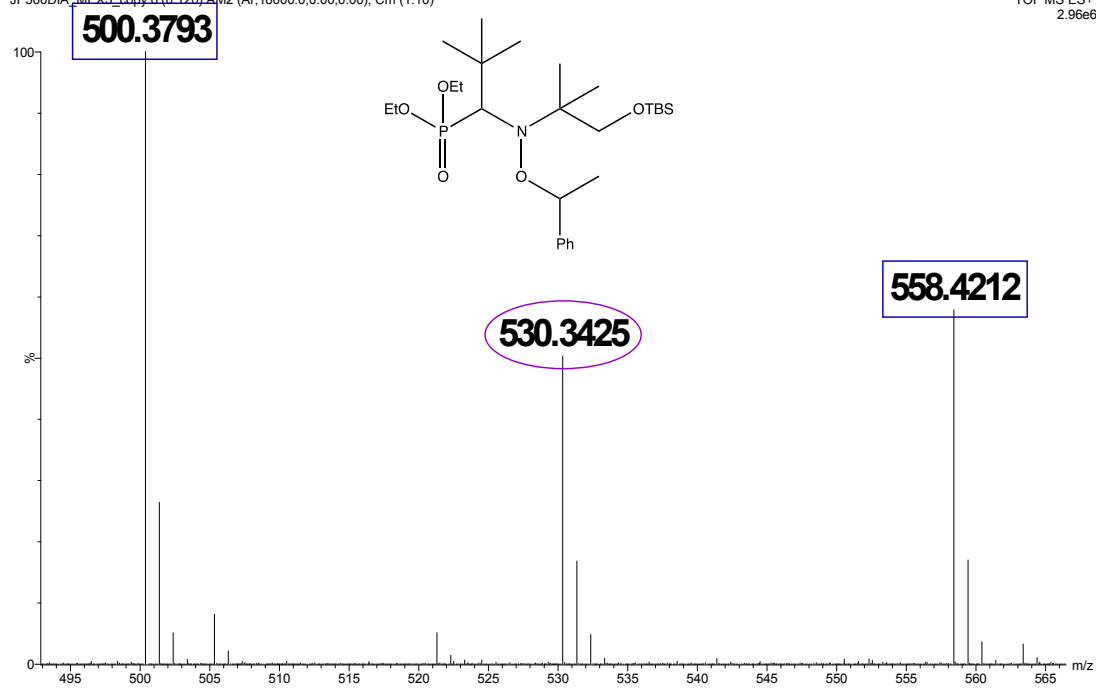

*Diethyl-(1-((1-hydroxy-2-methylpropan-2-yl)(1-(pyridin-2-yl)ethoxy)amino)-2,2-dimethylpropyl) phosphonate (4).*

**RS/SR-4**  $^1\text{H}$  NMR ( $\text{CDCl}_3$ , 300 MHz):

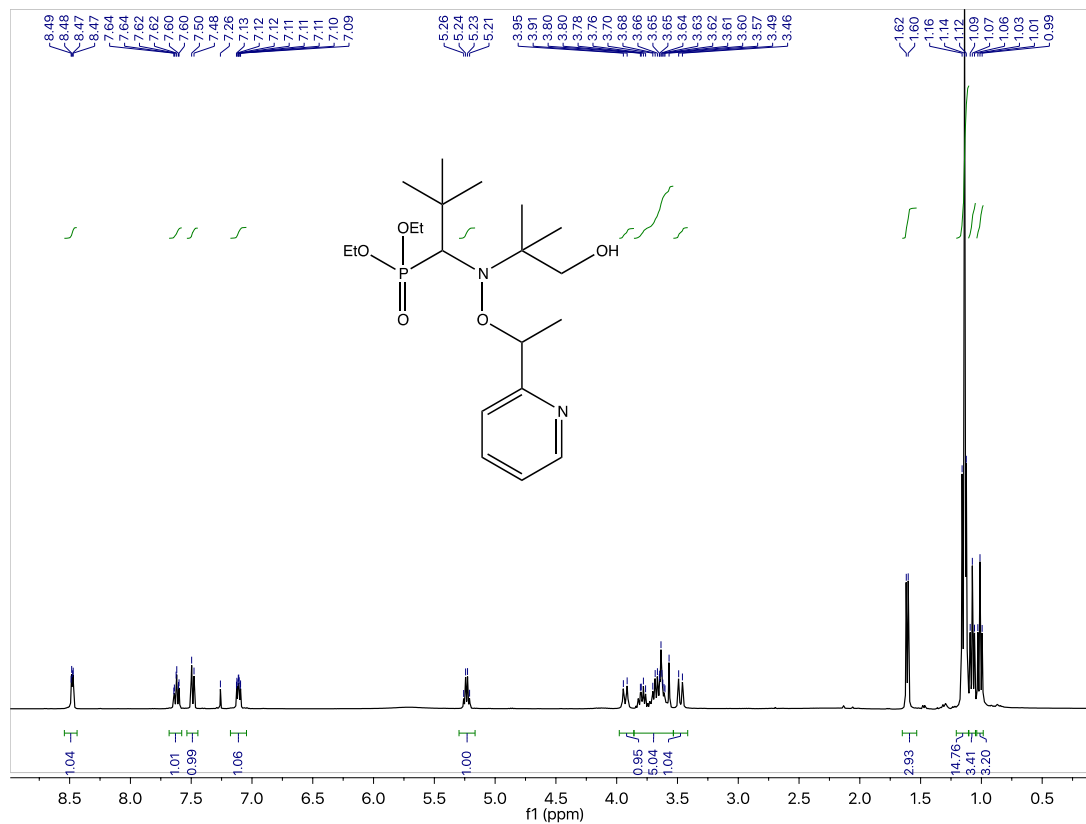

**RS/SR-4**  $^{13}\text{C}$  NMR ( $\text{CDCl}_3$ , 75 MHz):

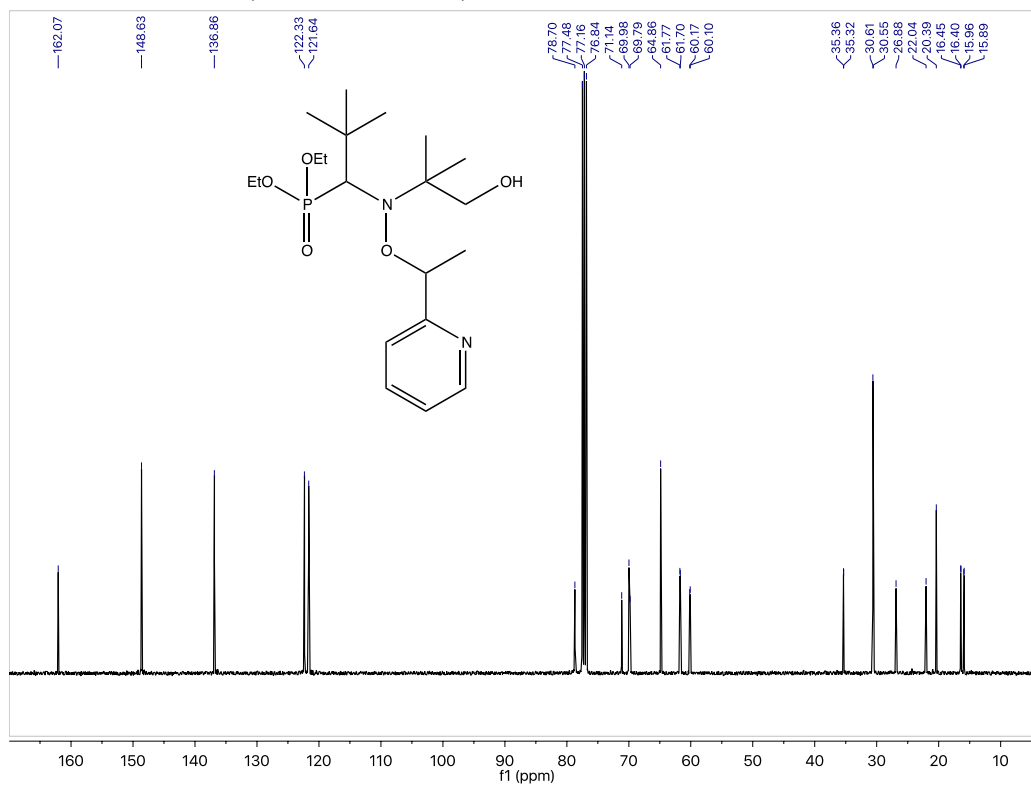

RS/SR-4 HRMS

JP297\_R6\_SR\_MEX1\_copy 8 (0.64) AM2 (Ar,18000.0,0.00,0.00); Cm (1:10)

TOF MS ES+  
2.18e5

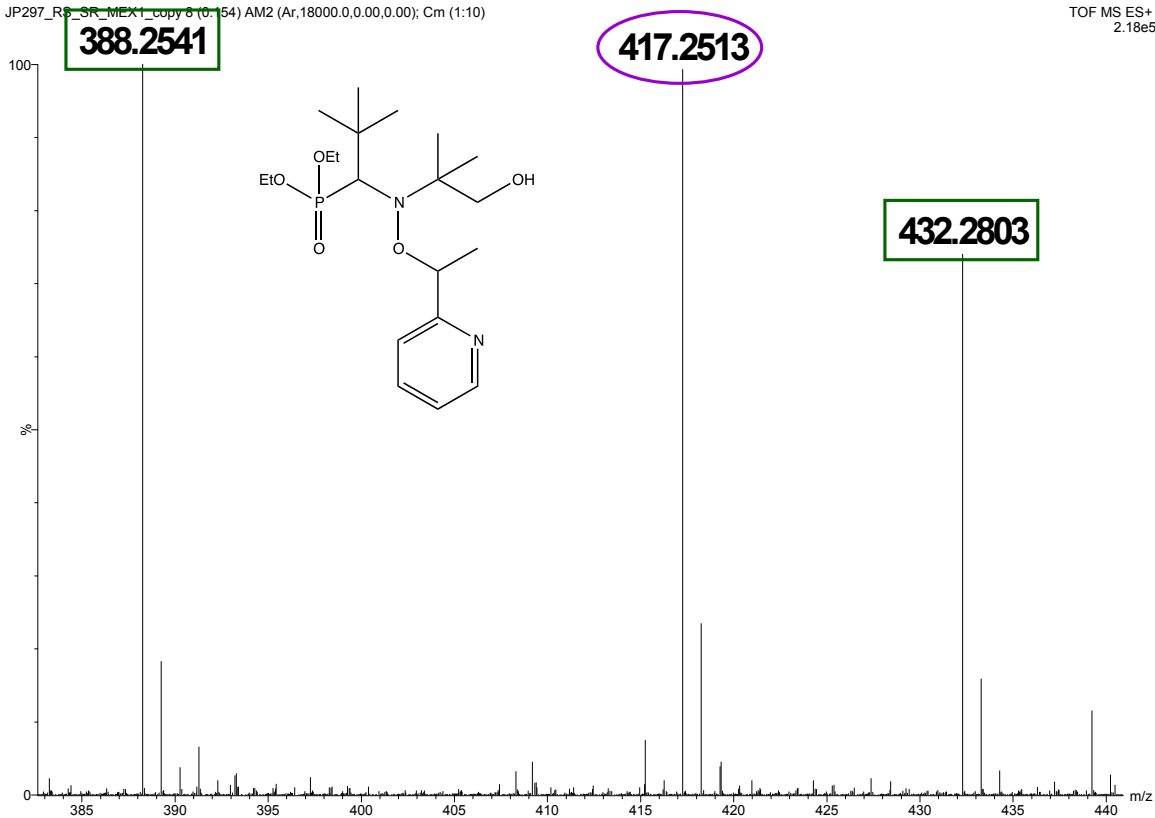

***RR/SS-4***  $^1\text{H}$  NMR ( $\text{CDCl}_3$ , 300 MHz):

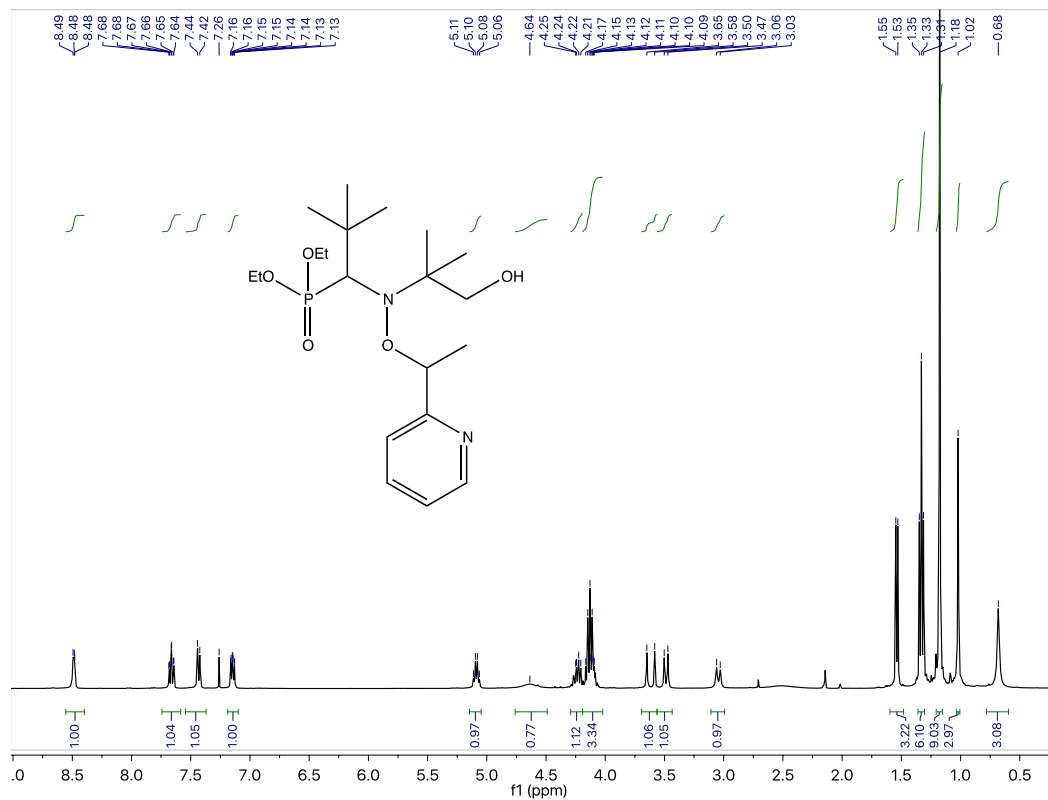

***RR/SS-4***  $^{13}\text{C}$  NMR ( $\text{CDCl}_3$ , 75 MHz):

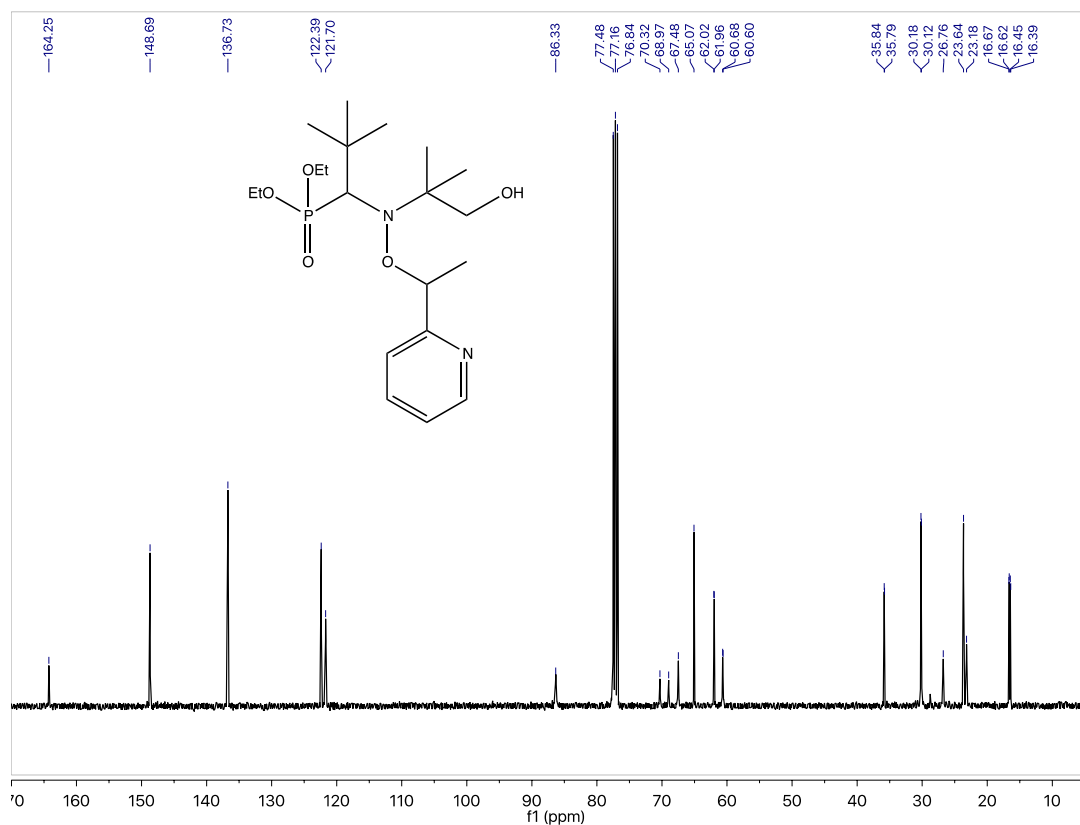

# RR/SS-4 HRMS

JP297\_RR\_SS\_MEX1\_copy 1 (0.034) AM2 (Ar,18000.0,0.00,0.00); Cm (1:10)

TOF MS ES+  
3.98e5

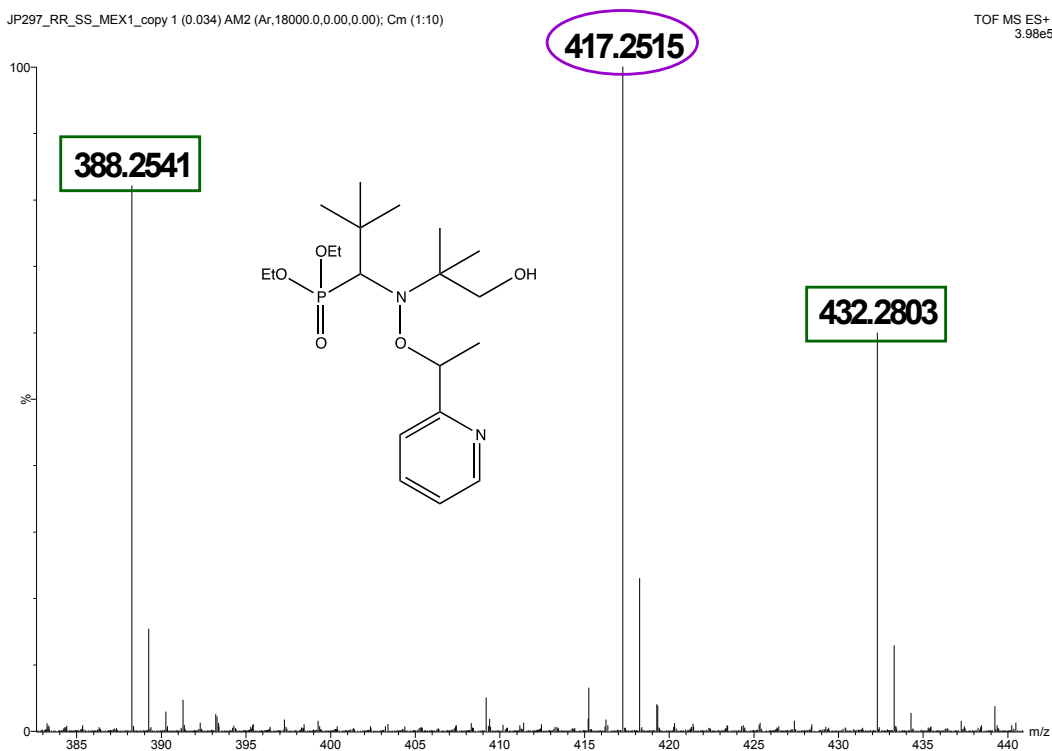

# RR/SS-4 COSY

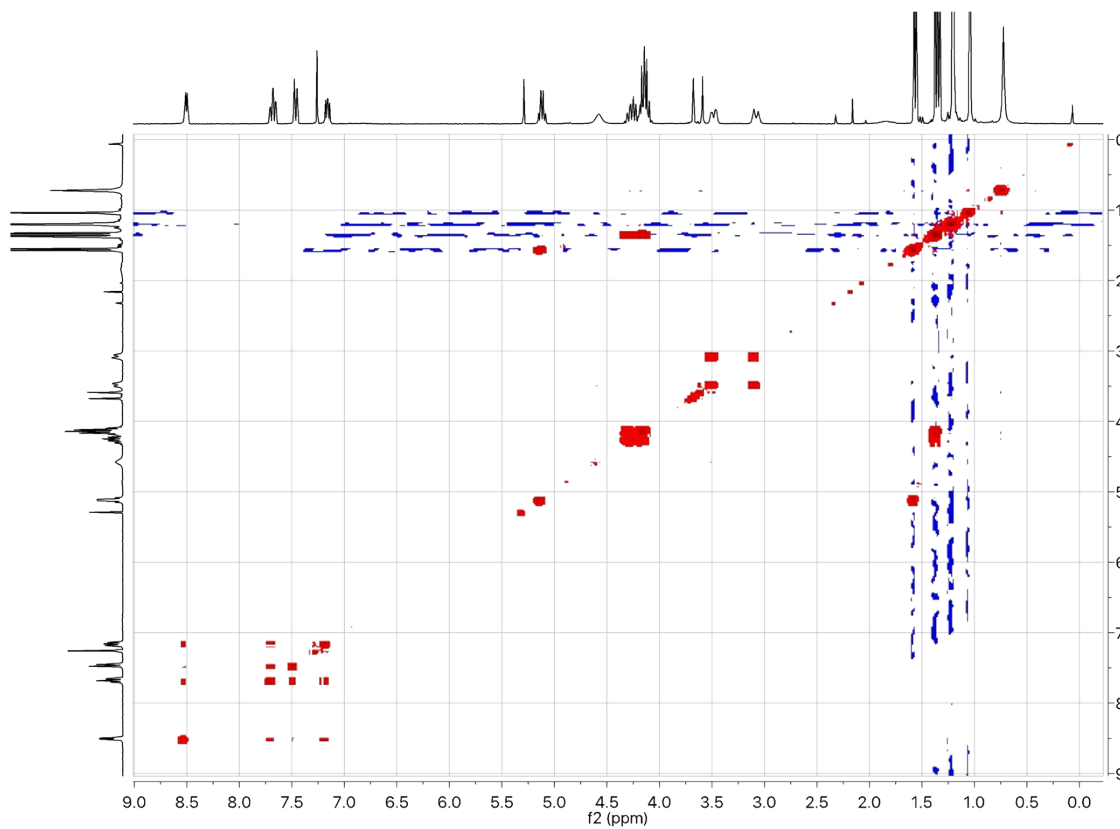

*RR/SS-4* : The ellipsoid contour percent is given at 50% for the ORTEP plot.

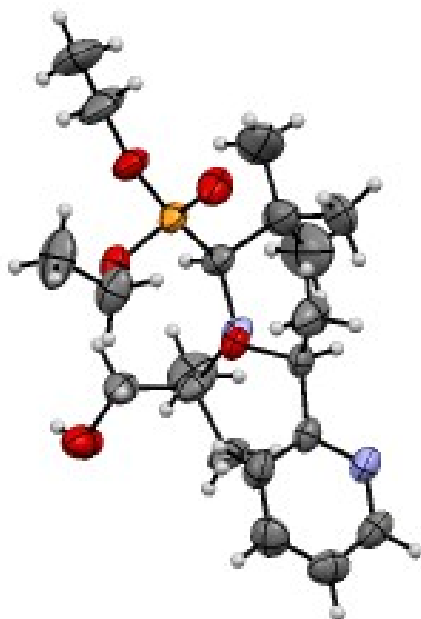

**Table 1SI.** XRD data for *RR/SS-4*

|                                           |                                                                 |                                             |                                                               |
|-------------------------------------------|-----------------------------------------------------------------|---------------------------------------------|---------------------------------------------------------------|
| Empirical formula                         | C <sub>20</sub> H <sub>37</sub> N <sub>2</sub> O <sub>5</sub> P | $\mu/\text{mm}^{-1}$                        | 0.148                                                         |
| Formula weight                            | 416.48                                                          | F(000)                                      | 904.0                                                         |
| Temperature/K                             | 293                                                             | Crystal size/mm <sup>3</sup>                | 0.34 × 0.2 × 0.08                                             |
| Crystal system                            | monoclinic                                                      | Radiation                                   | MoK $\alpha$ ( $\lambda = 0.71073$ )                          |
| Space group                               | P2 <sub>1</sub> /c                                              | 2 $\Theta$ range for data collection/°      | 6.738 to 56.766                                               |
| a/Å                                       | 14.4884(6)                                                      | Index ranges                                | -19 ≤ h ≤ 18, -15 ≤ k ≤ 15, -17 ≤ l ≤ 16                      |
| b/Å                                       | 12.0955(4)                                                      | Reflections collected                       | 18820                                                         |
| c/Å                                       | 14.1006(6)                                                      | Independent reflections                     | 5038 [R <sub>int</sub> = 0.0299, R <sub>sigma</sub> = 0.0274] |
| $\alpha$ /°                               | 90                                                              | Data/restraints/parameters                  | 5038/0/262                                                    |
| $\beta$ /°                                | 108.748(5)                                                      | Goodness-of-fit on F <sup>2</sup>           | 1.035                                                         |
| $\gamma$ /°                               | 90                                                              | Final R indexes [I >= 2 $\sigma$ (I)]       | R <sub>1</sub> = 0.0489, wR <sub>2</sub> = 0.1227             |
| Volume/Å <sup>3</sup>                     | 2339.94(17)                                                     | Final R indexes [all data]                  | R <sub>1</sub> = 0.0700, wR <sub>2</sub> = 0.1359             |
| Z                                         | 4                                                               | Largest diff. peak/hole / e Å <sup>-3</sup> | 0.28/-0.28                                                    |
| $\rho_{\text{calc}}/\text{g}/\text{cm}^3$ | 1.182                                                           |                                             |                                                               |



Diethyl ((R)-1-((1-hydroxy-2-methylpropan-2-yl)((S)-1-(pyridin-2-yl)ethoxy)amino)-2,2-dimethylpropyl)phosphonate (*RS/SR*-5).

*RS/SR*-5 <sup>1</sup>H NMR (CDCl<sub>3</sub>, 400 MHz):

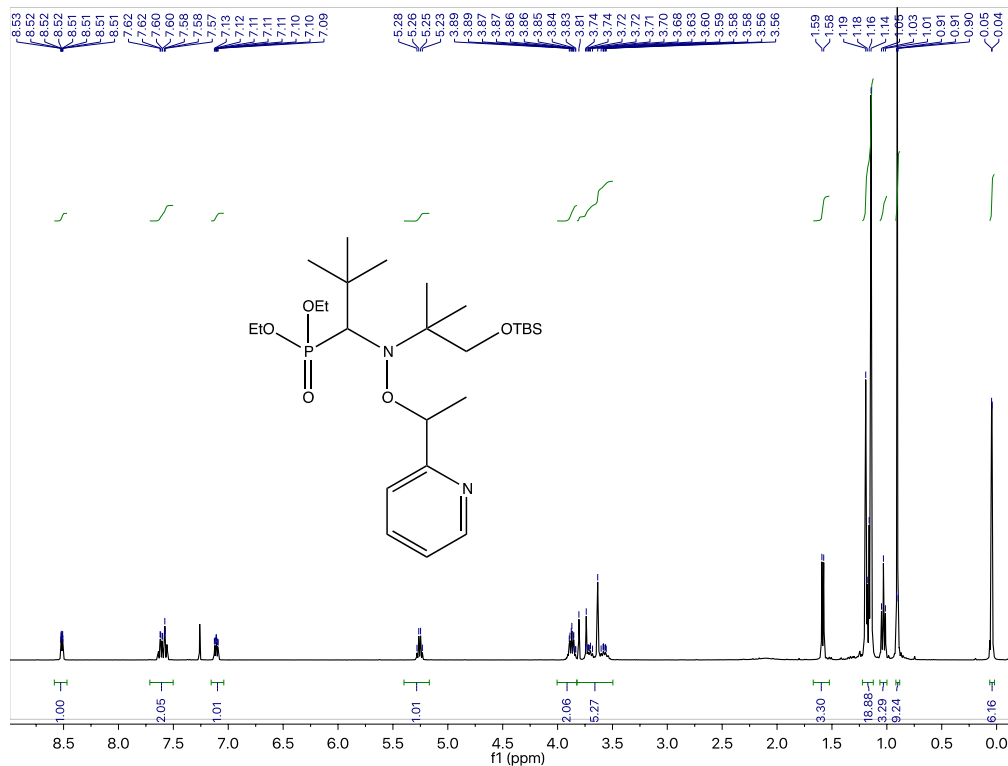

*RS/SR*-5 <sup>13</sup>C NMR (CDCl<sub>3</sub>, 75 MHz):

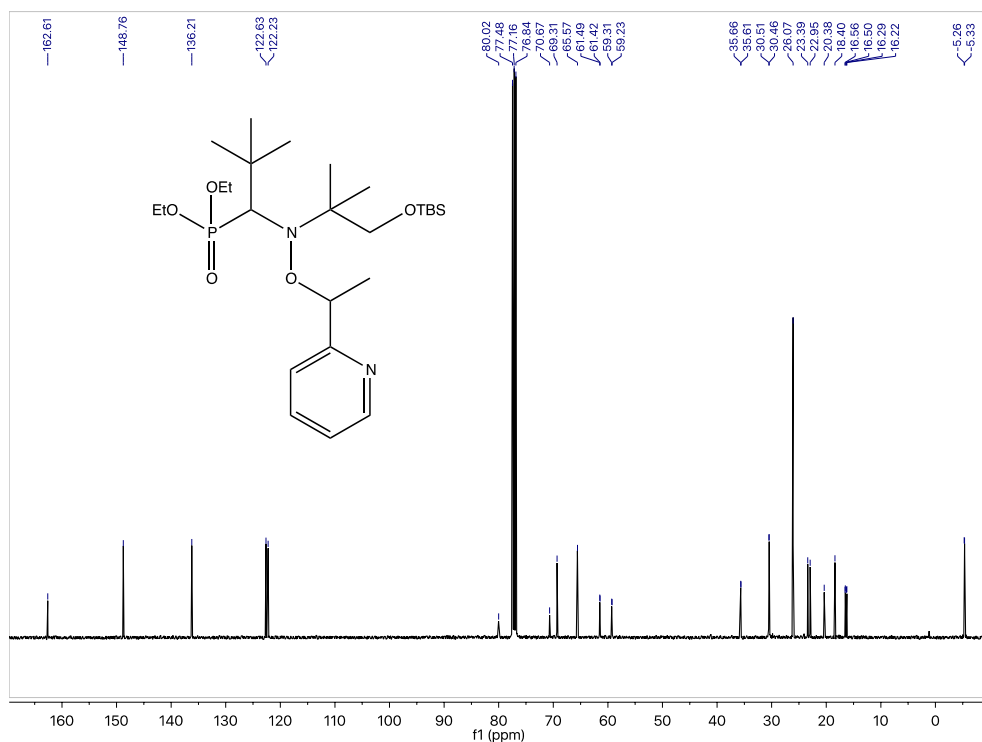

Diethyl((R)-1-((1-hydroxy-2-methylpropan-2-yl)((R)-1-(pyridin-2-yl)ethoxy)amino)-2,2-dimethylpropyl)phosphonate (RR/SS-5).

RR/SS-5 <sup>1</sup>H NMR (CDCl<sub>3</sub>, 400 MHz):

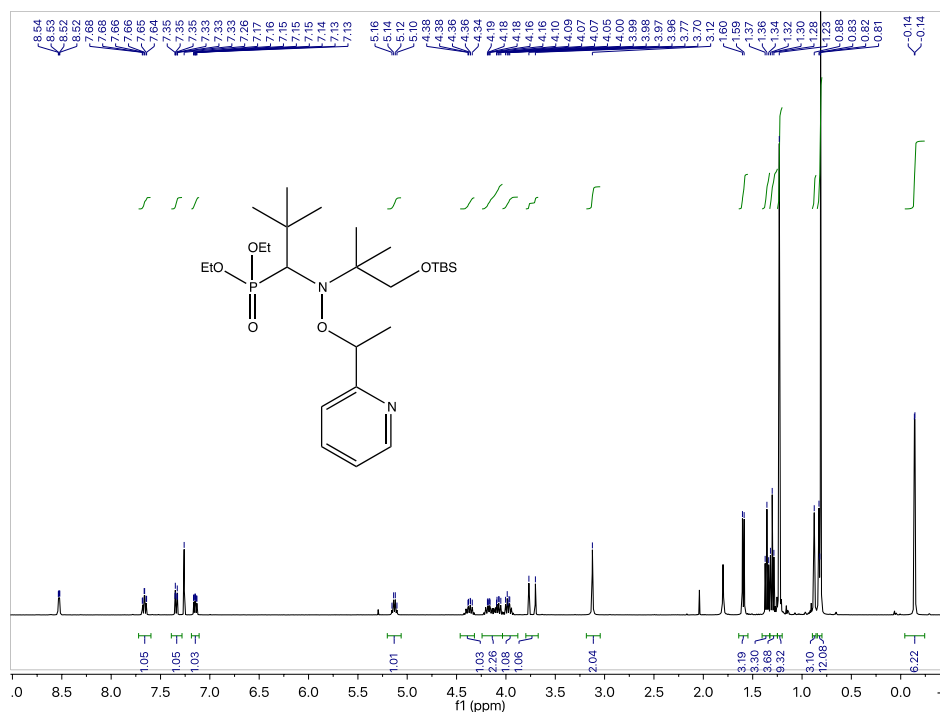

RR/SS-5 <sup>13</sup>C NMR (CDCl<sub>3</sub>, 101 MHz):

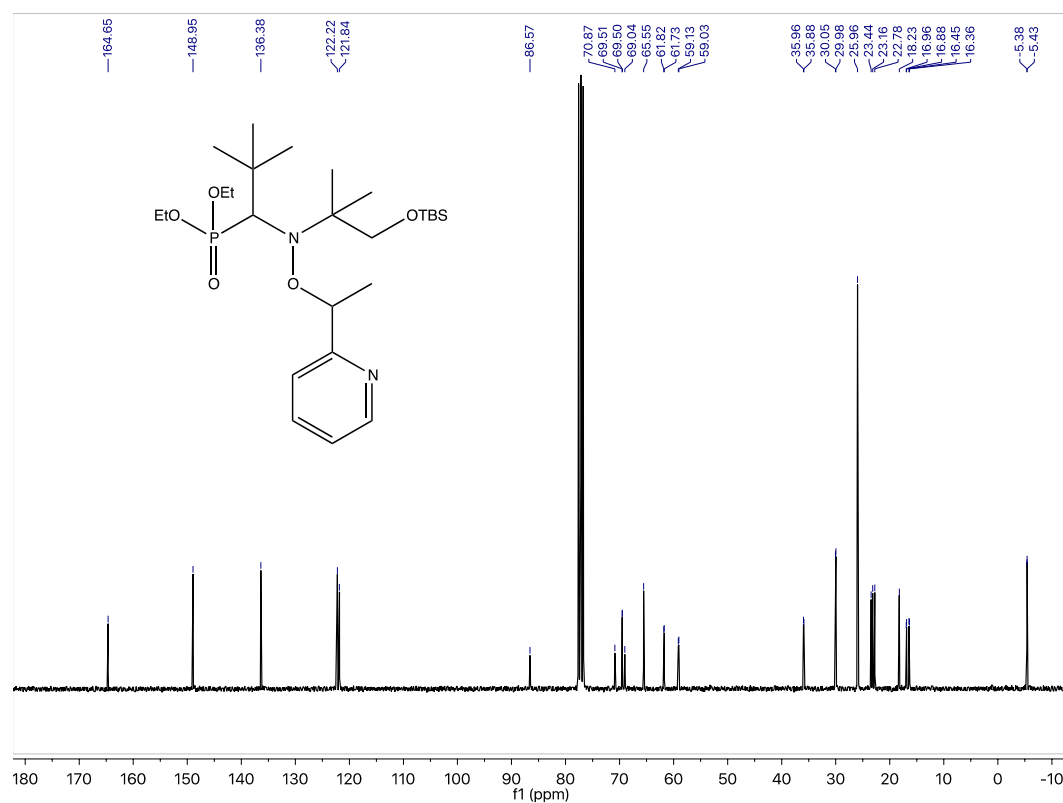

# RS/SR-5 and RR/SS-5 mixture HRMS

JP369\_D3AA\_CONE20\_MEX1\_copy 10 (0.188) AM2 (Ar,18000.0,0.00,0.00); Cm (1:10)

TOF MS ES+  
1.16e6

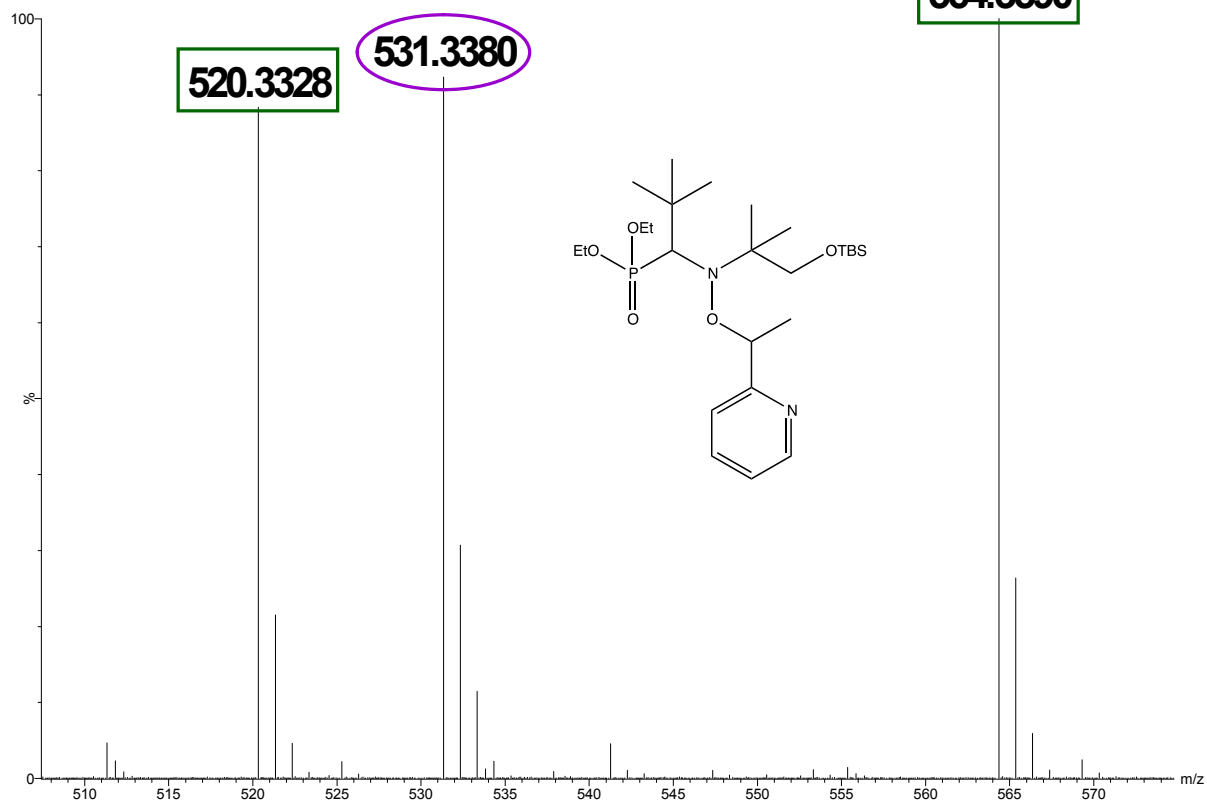

2-bromo-2-(pyridin-2-yl)ethyl acetate (**6b**).

$^1\text{H}$  NMR ( $\text{CDCl}_3$ , 400 MHz):

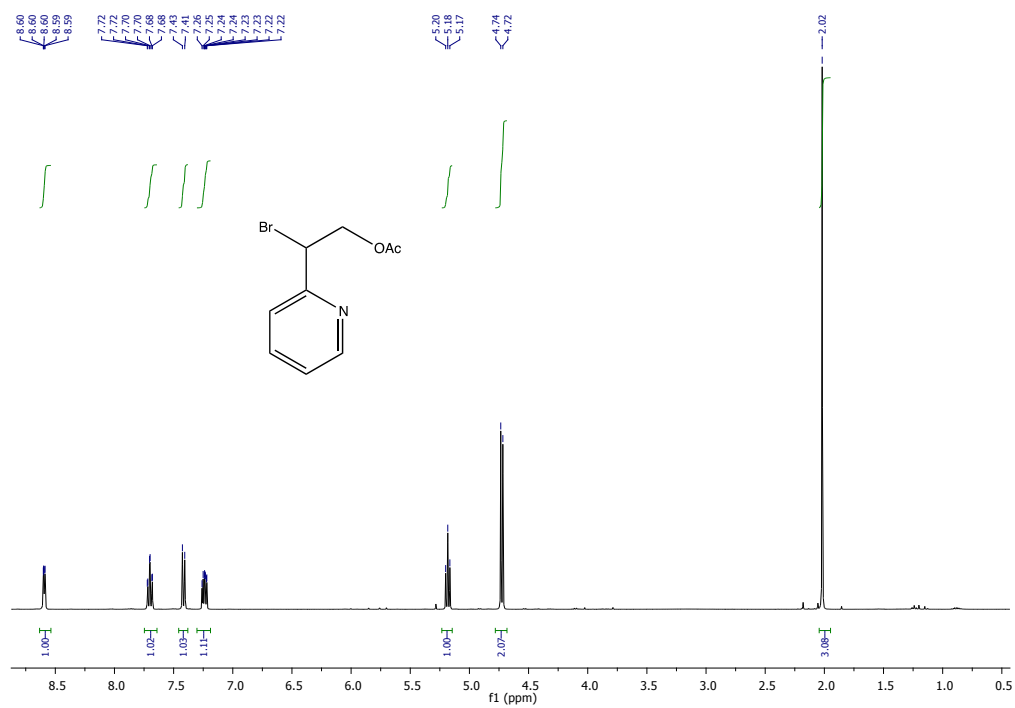

**6b**  $^{13}\text{C}$  NMR ( $\text{CDCl}_3$ , 101 MHz):

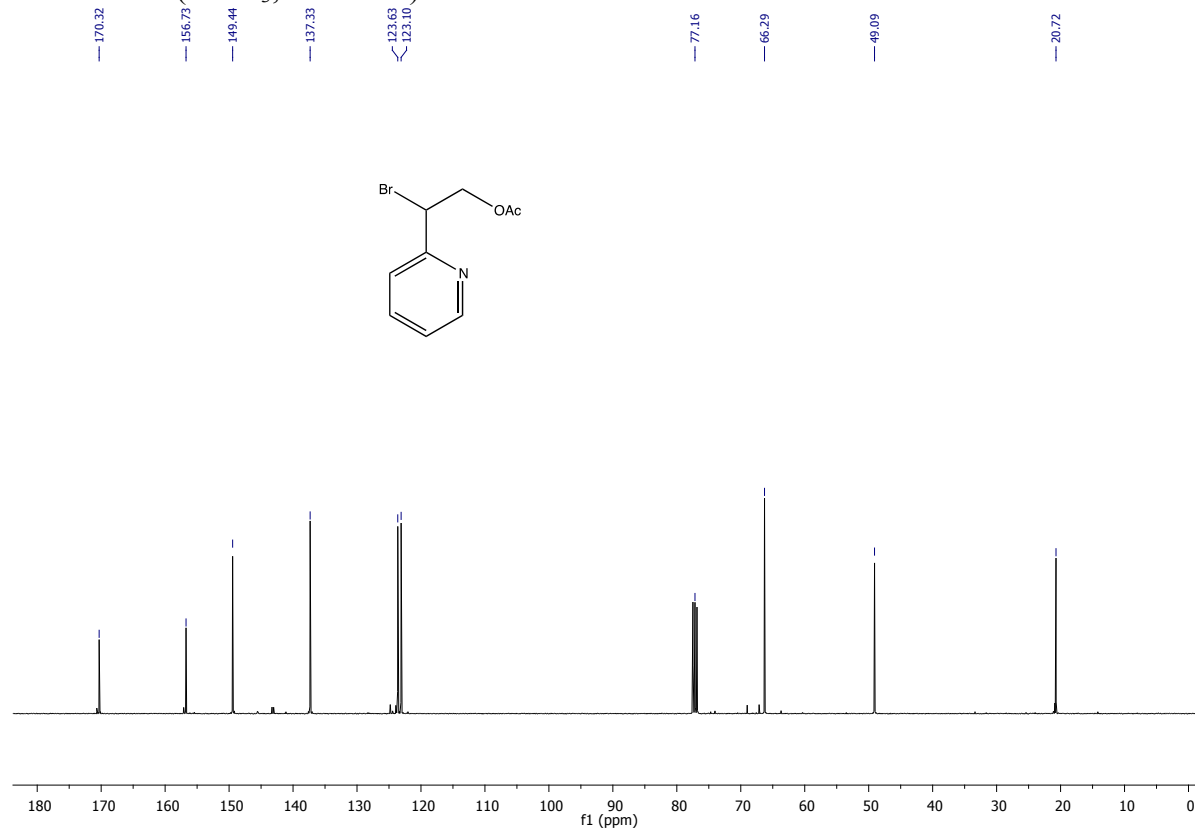

# 6b HRMS

BRCO\_MEX1\_copy 6 (0.120) AM2 (Ar.18000-0.0.00.0.00): Cm (1:10)

TOF MS ES+  
1.22e6

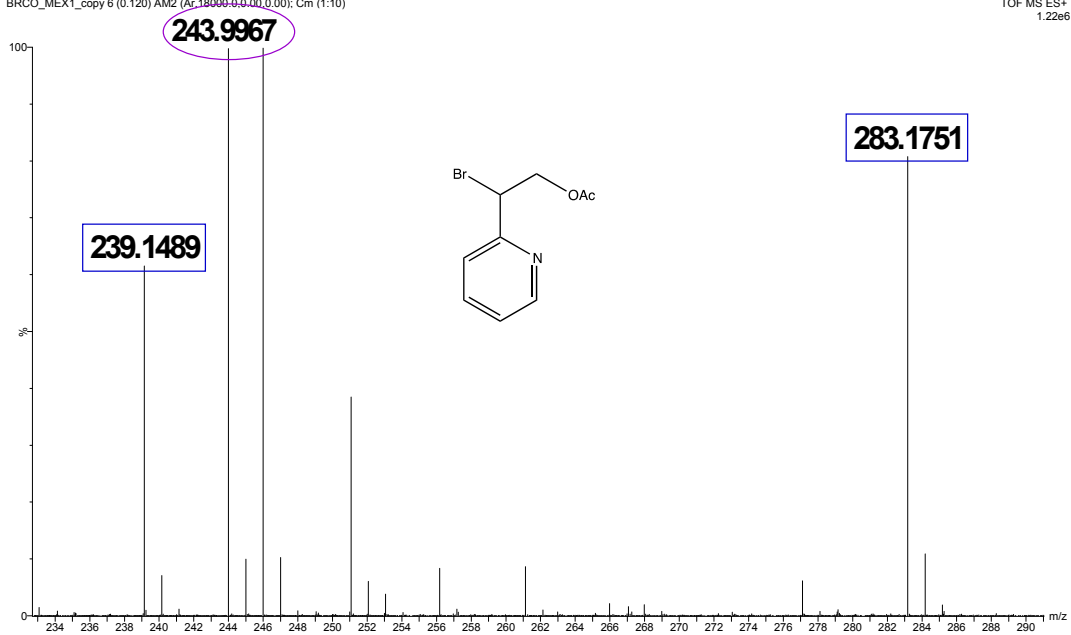

*Diethyl-(1-(tert-butyl-(2-hydroxy-1-(pyridin-2-yl)ethoxy)amino)-2,2-dimethylpropyl) phosphonate (6).*

**RS/SR-6**  $^1\text{H}$  NMR ( $\text{CDCl}_3$ , 400 MHz):

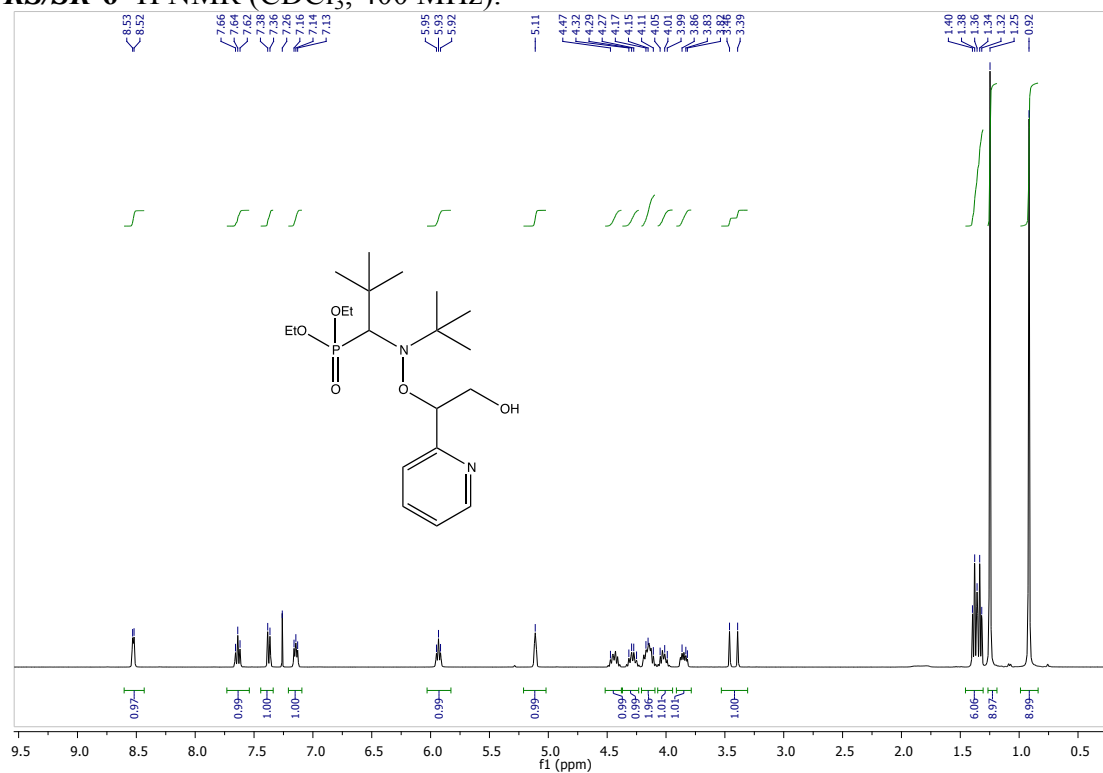

**RS/SR-6**  $^{13}\text{C}$  NMR ( $\text{CDCl}_3$ , 101 MHz):

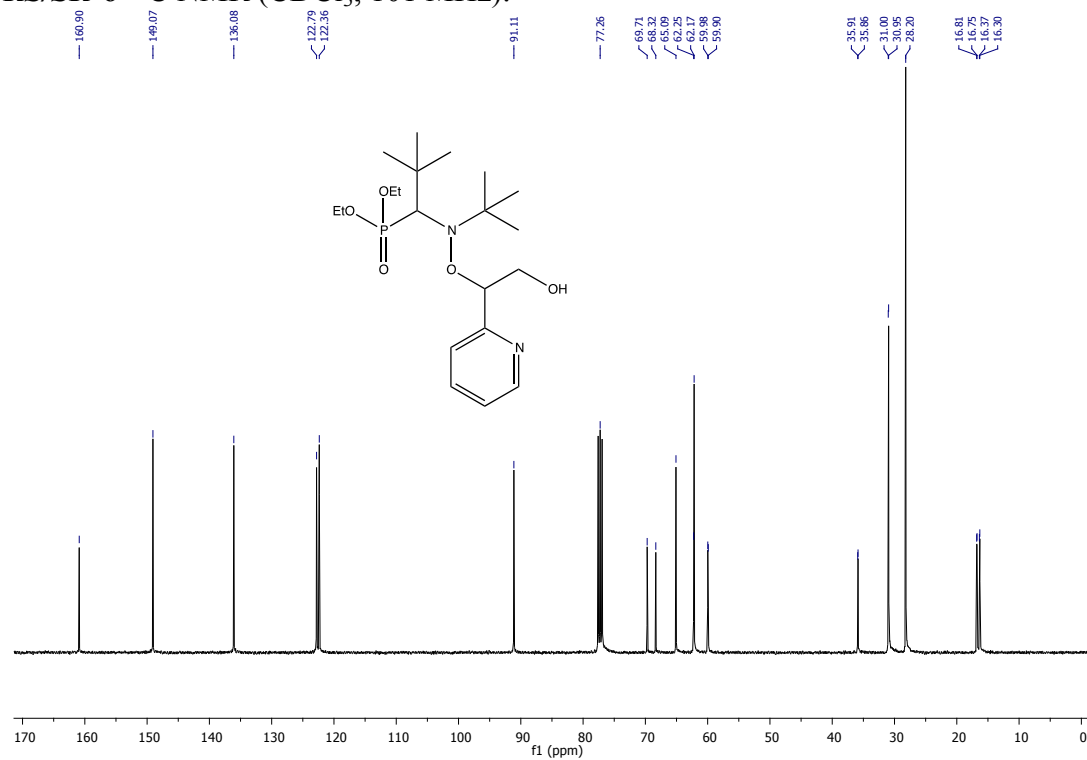

# RS/SR-6 HRMS

B1\_D3AA\_CONE20\_MEX2\_copy\_10 (0.188) AM2 (Ar,18000.0,0.00,0.00); Cm (1:10)

TOF MS ES+  
7.81e5

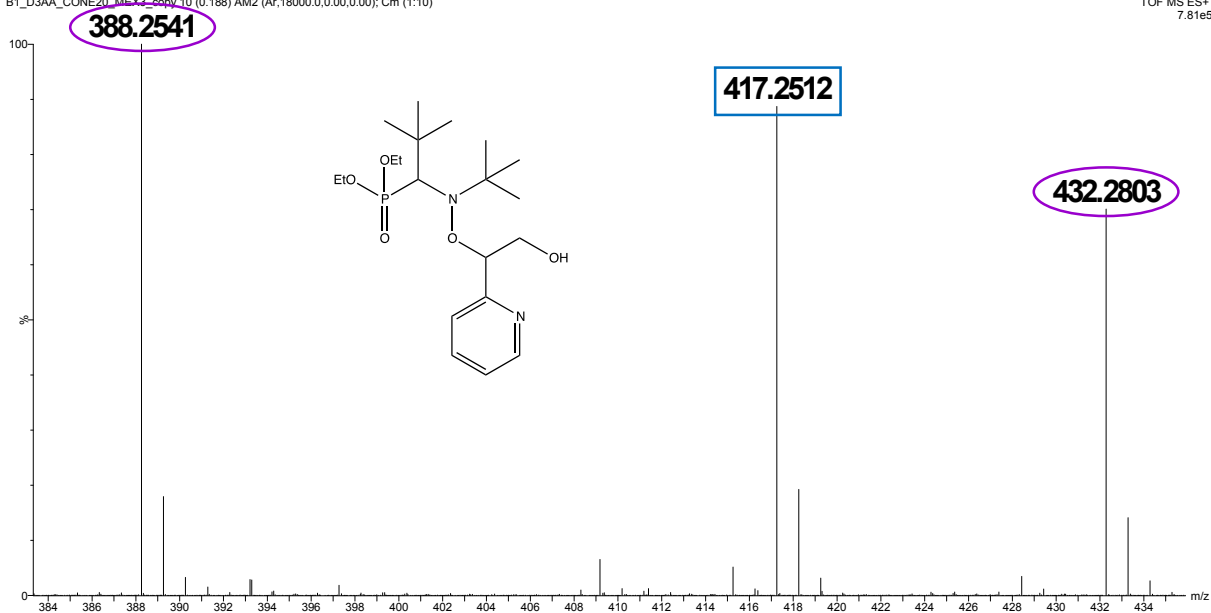

# RS/SR-6 COSY

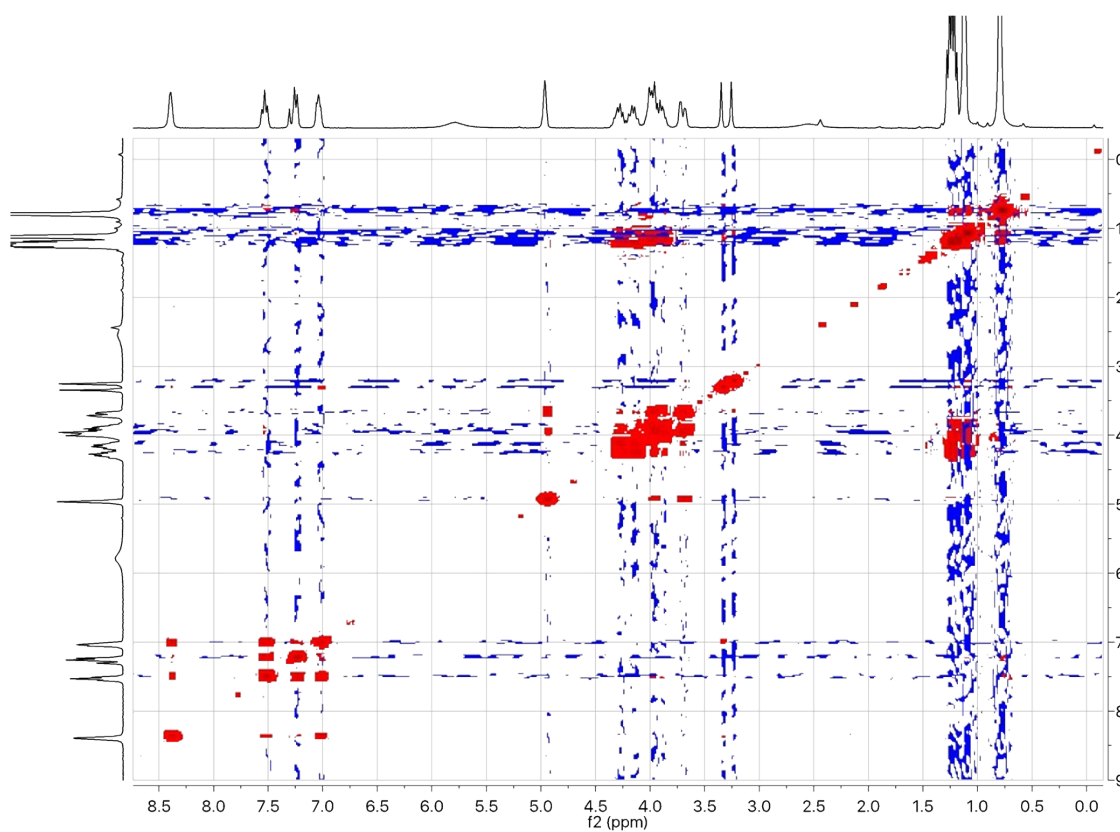

*RS/SR-6* : The ellipsoid contour percent is given at 50% for the ORTEP plot.

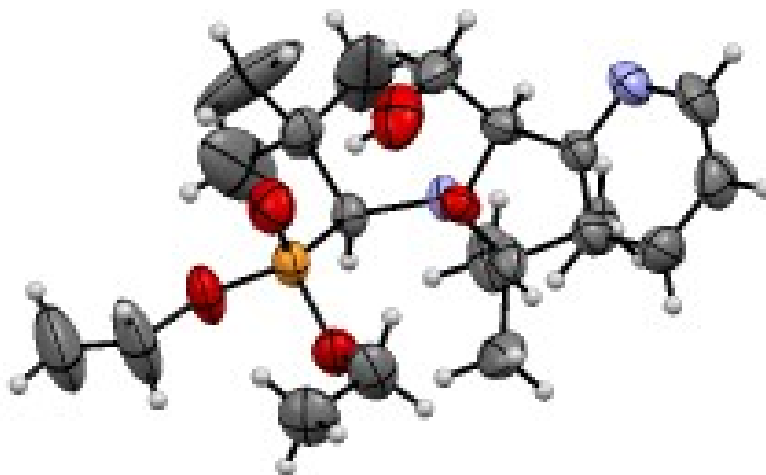

**Table 2SI.** XRD data for *RS/SR-6*

|                                           |                                                                 |                                                  |                                                               |
|-------------------------------------------|-----------------------------------------------------------------|--------------------------------------------------|---------------------------------------------------------------|
| Empirical formula                         | C <sub>20</sub> H <sub>37</sub> N <sub>2</sub> O <sub>5</sub> P | $\mu/\text{mm}^{-1}$                             | 0.148                                                         |
| Formula weight                            | 416.48                                                          | F(000)                                           | 904.0                                                         |
| Temperature/K                             | 293                                                             | Crystal size/mm <sup>3</sup>                     | 0.26 × 0.18 × 0.08                                            |
| Crystal system                            | monoclinic                                                      | Radiation                                        | MoK $\alpha$ ( $\lambda = 0.71073$ )                          |
| Space group                               | P2 <sub>1</sub> /c                                              | 2 $\Theta$ range for data collection/ $^{\circ}$ | 7.064 to 55.41                                                |
| a/ $\text{\AA}$                           | 13.3358(4)                                                      | Index ranges                                     | -16 ≤ h ≤ 16, -11 ≤ k ≤ 11, -25 ≤ l ≤ 24                      |
| b/ $\text{\AA}$                           | 8.9190(3)                                                       | Reflections collected                            | 15918                                                         |
| c/ $\text{\AA}$                           | 19.7702(8)                                                      | Independent reflections                          | 4783 [R <sub>int</sub> = 0.0272, R <sub>sigma</sub> = 0.0307] |
| $\alpha/^{\circ}$                         | 90                                                              | Data/restraints/parameters                       | 4783/0/262                                                    |
| $\beta/^{\circ}$                          | 95.598(3)                                                       | Goodness-of-fit on F <sup>2</sup>                | 1.052                                                         |
| $\gamma/^{\circ}$                         | 90                                                              | Final R indexes [I ≥ 2 $\sigma$ (I)]             | R <sub>1</sub> = 0.0621, wR <sub>2</sub> = 0.1501             |
| Volume/ $\text{\AA}^3$                    | 2340.28(14)                                                     | Final R indexes [all data]                       | R <sub>1</sub> = 0.0852, wR <sub>2</sub> = 0.1665             |
| Z                                         | 4                                                               | Largest diff. peak/hole / e $\text{\AA}^{-3}$    | 0.61/-0.48                                                    |
| $\rho_{\text{calc}}/\text{g}/\text{cm}^3$ | 1.182                                                           |                                                  |                                                               |



**RR/SS-6**  $^1\text{H}$  NMR ( $\text{CDCl}_3$ , 400 MHz):

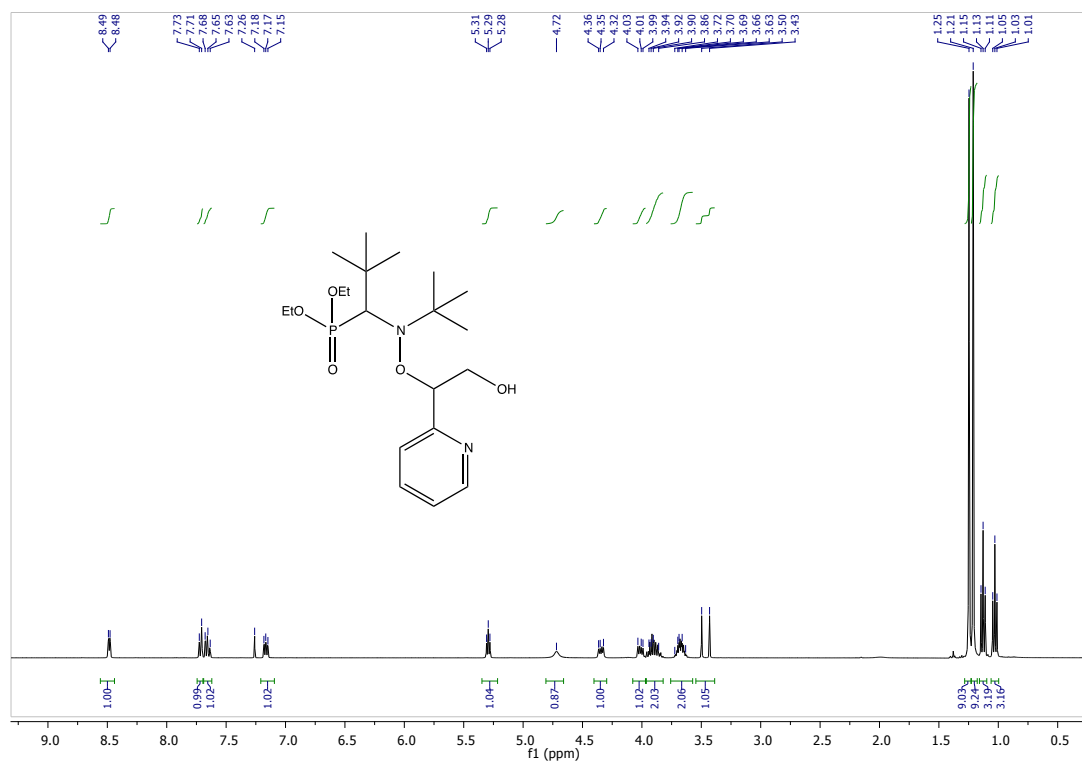

**RR/SS-6**  $^{13}\text{C}$  NMR ( $\text{CDCl}_3$ , 101 MHz):

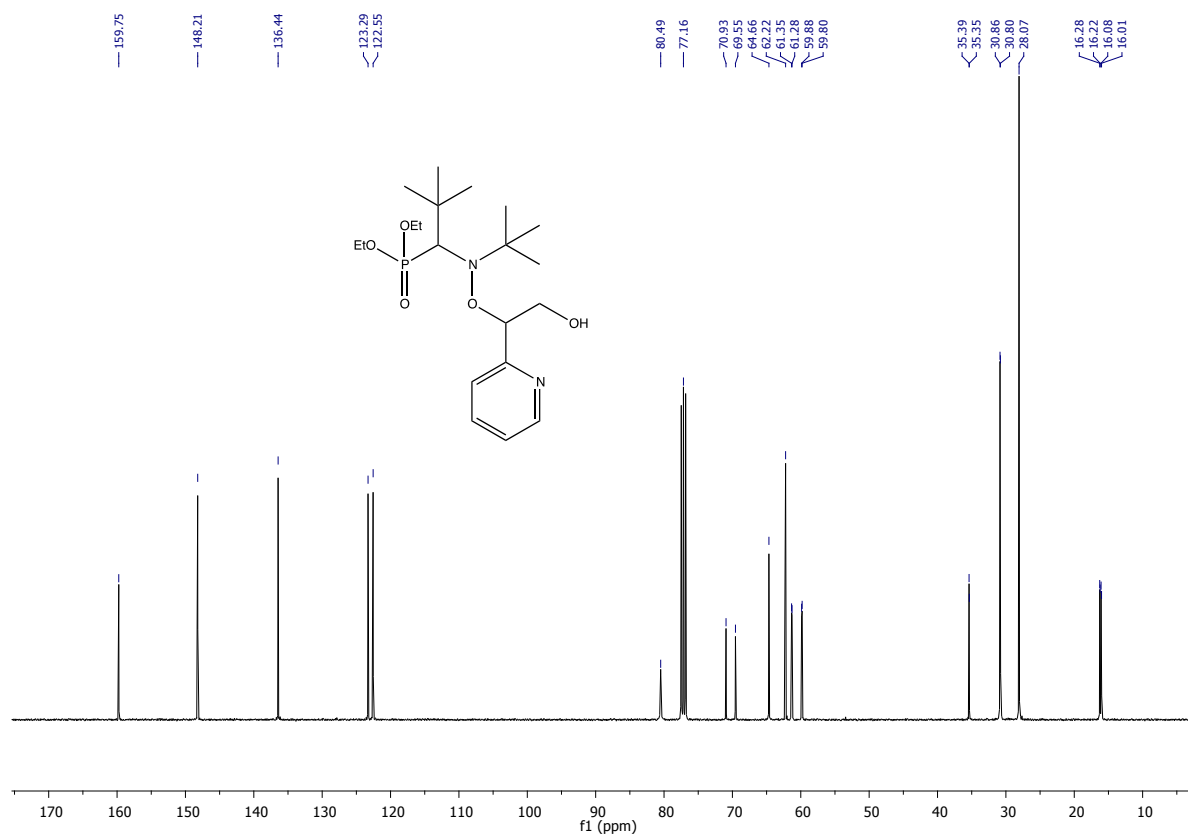

# RR/SS-6 HRMS

B2\_D3AA\_CONE20\_MEX2\_copy6 (6.120) AM2 (Ar, 18000.0, 0.00, 0.00); Cm (1:10)

TOF MS ES+  
1.07e6

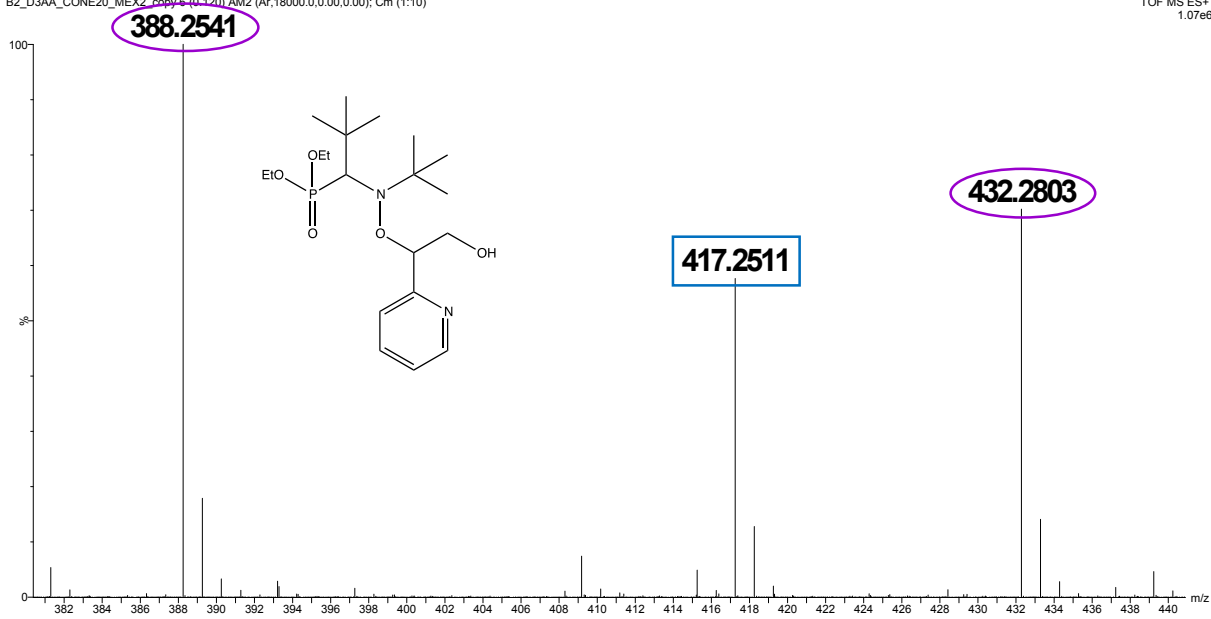

*(S)*-2-((*tert*-butyl((*R*)-1-(diethoxyphosphoryl)-2,2-dimethylpropyl)amino)oxy)-2-(pyridin-2-yl)ethyl acetate (**RS/SR-7**).

**RS/SR-7**  $^1\text{H}$  NMR ( $\text{CDCl}_3$ , 300 MHz):

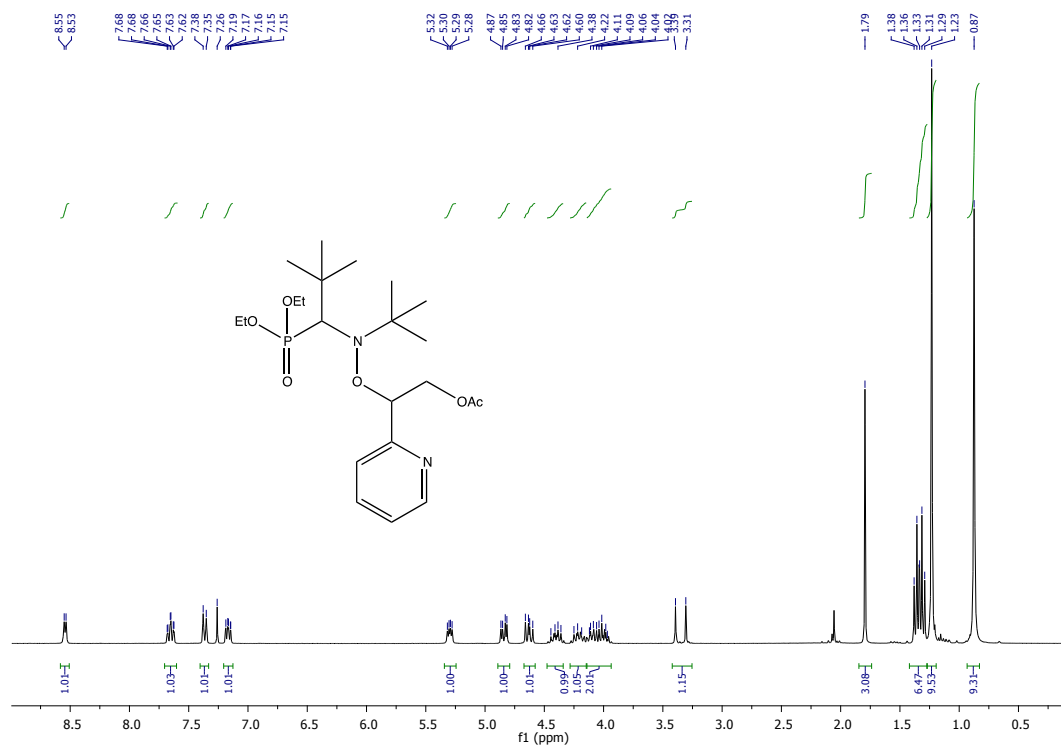

**RS/SR-7**  $^{13}\text{C}$  NMR ( $\text{CDCl}_3$ , 101 MHz):

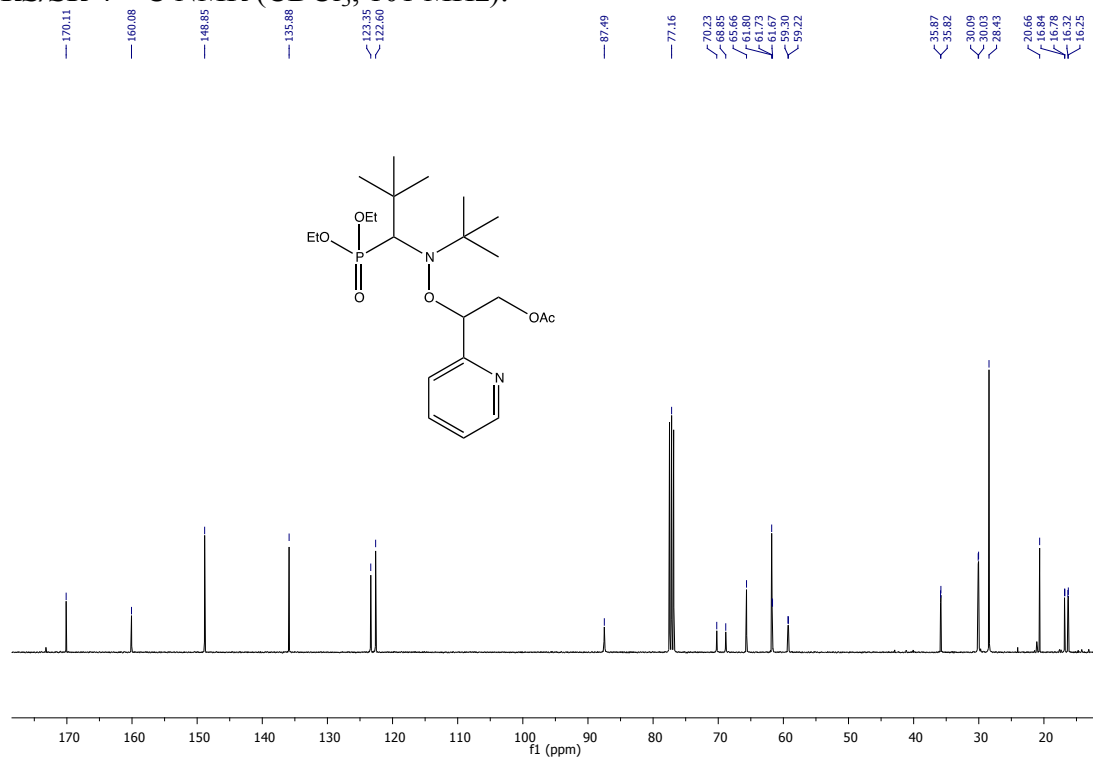

# RS/SR-7 HRMS

C1\_D3AA\_CONE20\_MEX1\_2019-06-17(1).AM2 (Ar,18000.0,0.00,0.00); Cm (1:10)

TOF MS ES+  
8.59e5

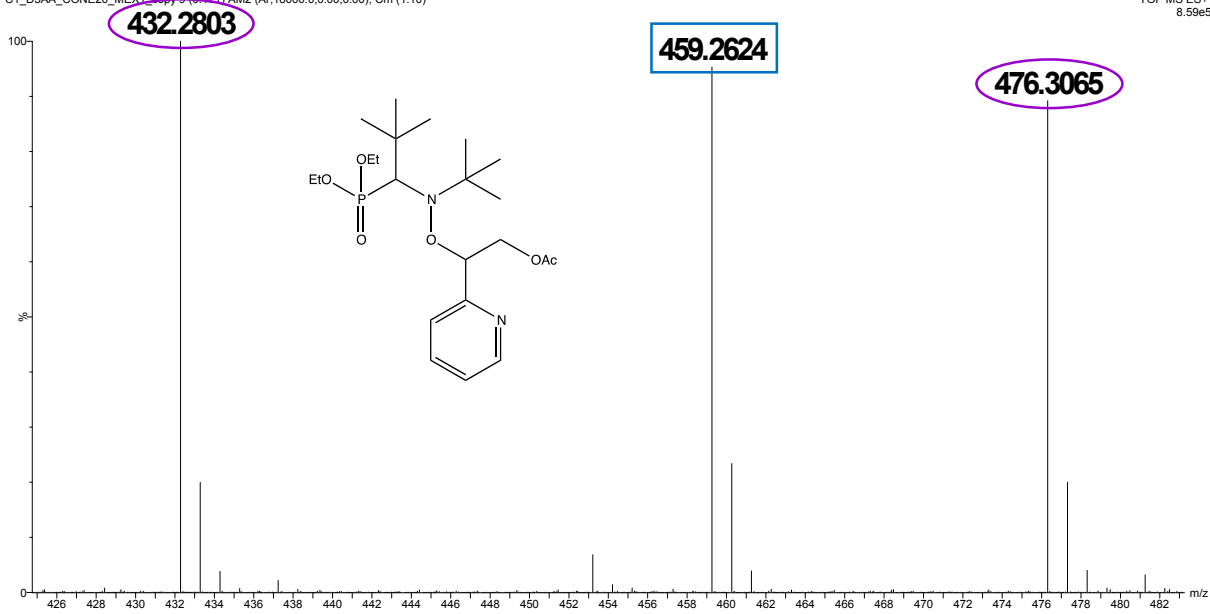

(*R*)-2-((*tert*-butyl((*R*)-1-(diethoxyphosphoryl)-2,2-dimethylpropyl)amino)oxy)-2-(pyridin-2-yl)ethyl acetate (**RR/SS-7**).

**RR/SS-7**  $^1\text{H}$  NMR ( $\text{CDCl}_3$ , 300 MHz):

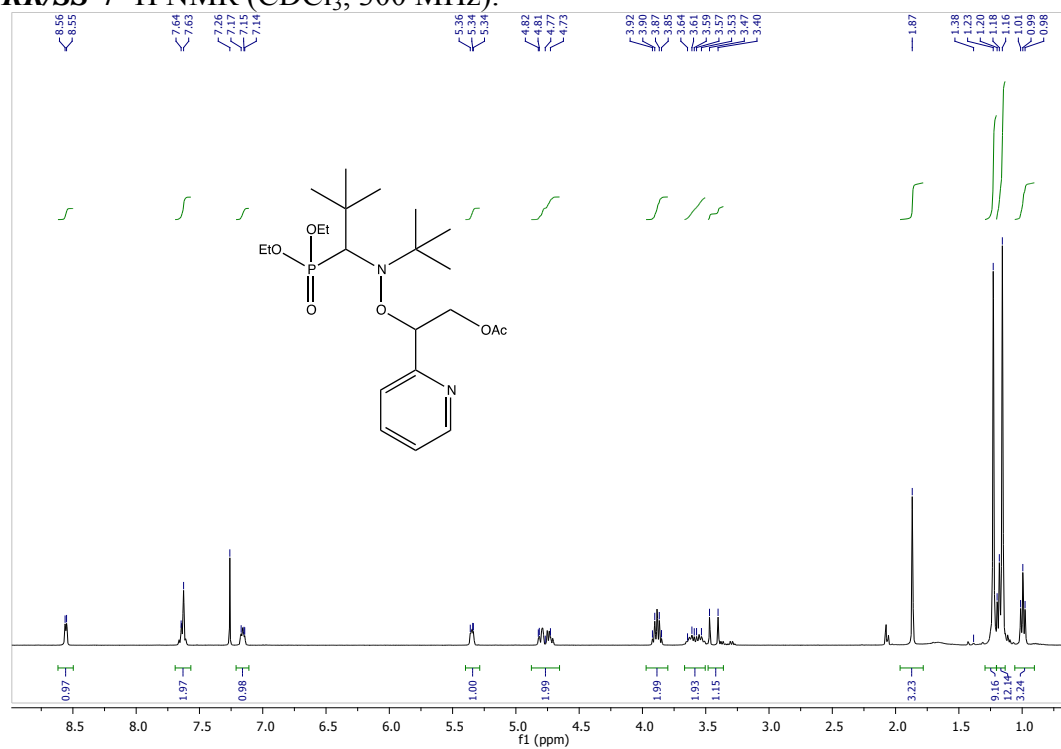

**RS/SR-7**  $^{13}\text{C}$  NMR ( $\text{CDCl}_3$ , 101 MHz):

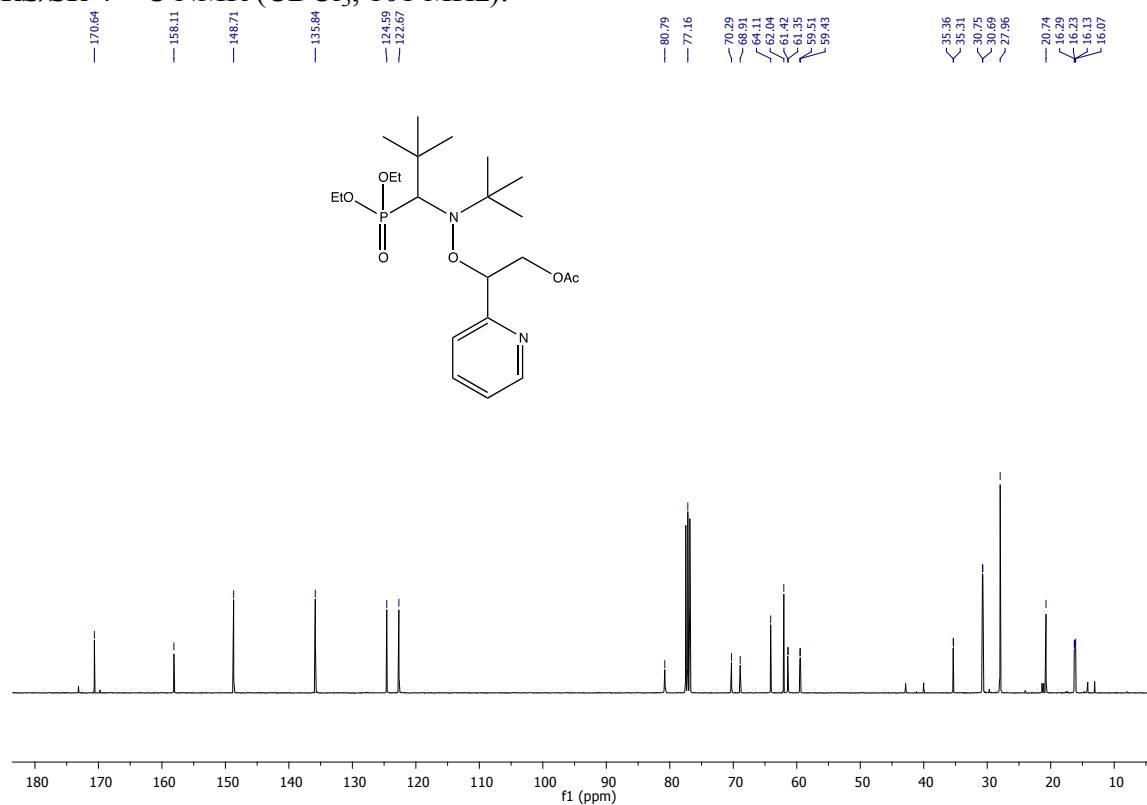

**RR/SS-7 HRMS**

C2\_D3AA\_CONE20\_MEX3\_copy 1 (0.934) AM2 (Ar,18000.0,0.00,0.00); Cm (1:10)

TOF MS ES+  
3.70e5

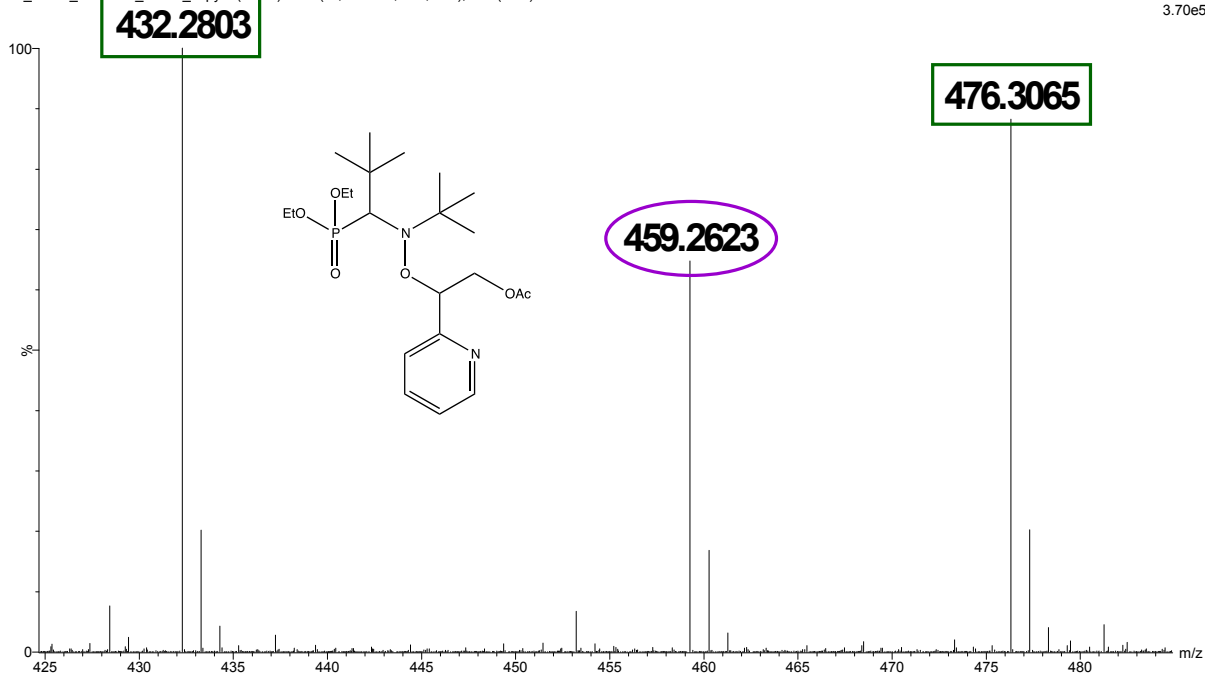

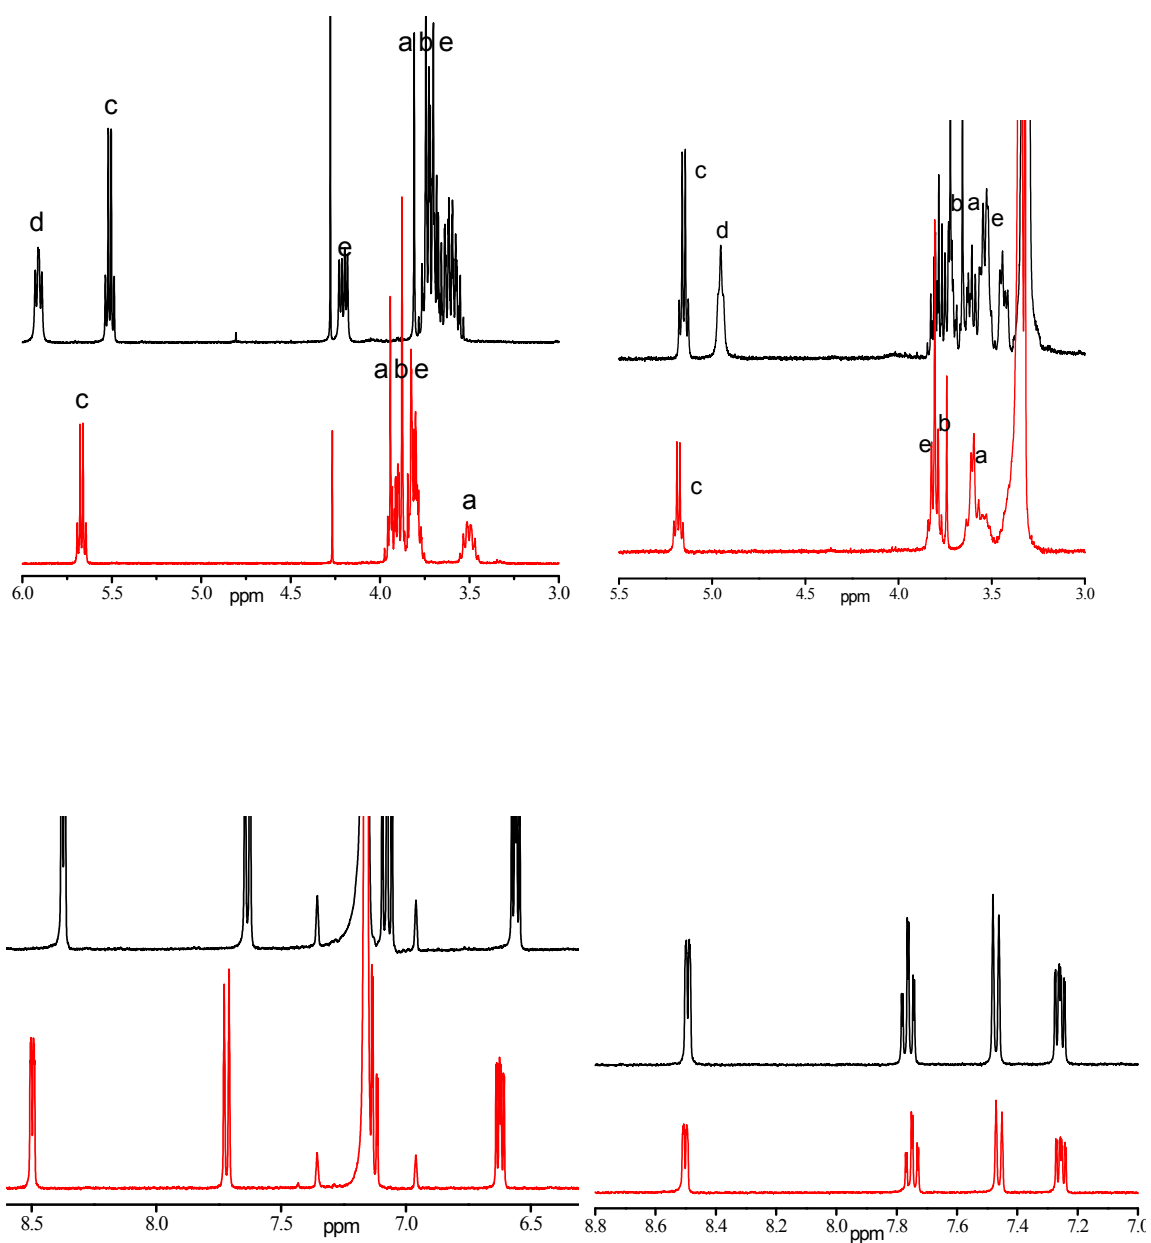

**Figure 1SI.**  $^1\text{H}$  NMR of *RS/SR-4* (top) and *RS/SR-5* (bottom) in the range 3 – 6 ppm (top row) and 6 – 9 ppm (aromatic proton zone, bottom row) in benzene- $d_6$  (left) and DMSO- $d_6$  (right). Labelling of protons  $\text{MeCH}_2\text{O}$ ,  $\text{CHP}$ ,  $\text{CHMe}$ ,  $\text{OH}$ , and  $\text{CH}_2\text{O}$  is a – e, respectively.

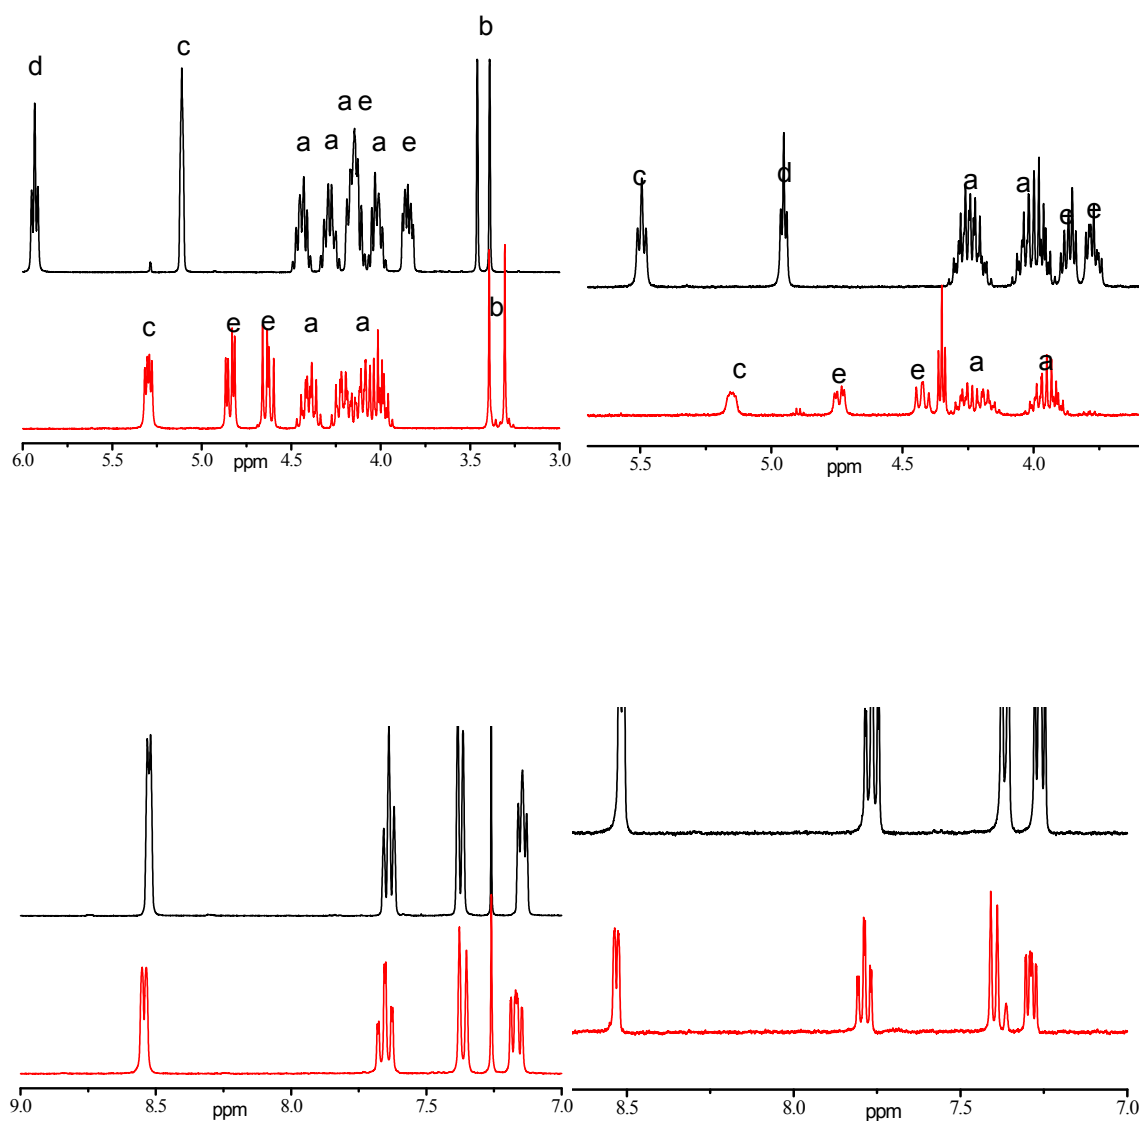

**Figure 2SI.**  $^1\text{H}$  NMR of *RS/SR-6* (top) and *RS/SR-7* (bottom) in the range 3 – 6 ppm (top row) and 6 – 9 ppm (pyridyl proton zone, bottom row) in  $\text{CDCl}_3$  (left) and  $\text{DMSO-}d_6$  (right). Labelling of protons  $\text{MeCH}_2\text{O}$ ,  $\text{CHP}$ ,  $\text{CHMe}$ ,  $\text{OH}$ , and  $\text{CH}_2\text{O}$  is a – e, respectively.



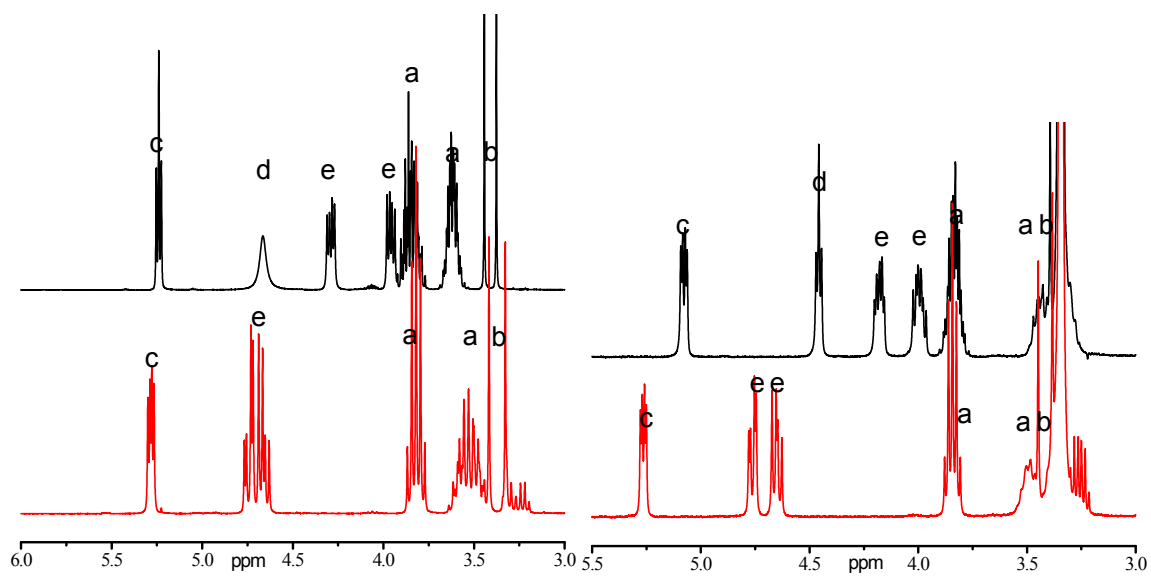

**Figure 3SI.**  $^1\text{H}$  NMR of *RR/SS-6* (top) and *RR/SS-7* (bottom) in the range 3 – 6 ppm in  $\text{CDCl}_3$  (left) and  $\text{DMSO}-d_6$  (right). Labelling of protons  $\text{MeCH}_2\text{O}$ ,  $\text{CHP}$ ,  $\text{CHMe}$ ,  $\text{OH}$ , and  $\text{CH}_2\text{O}$  is a – e, respectively.

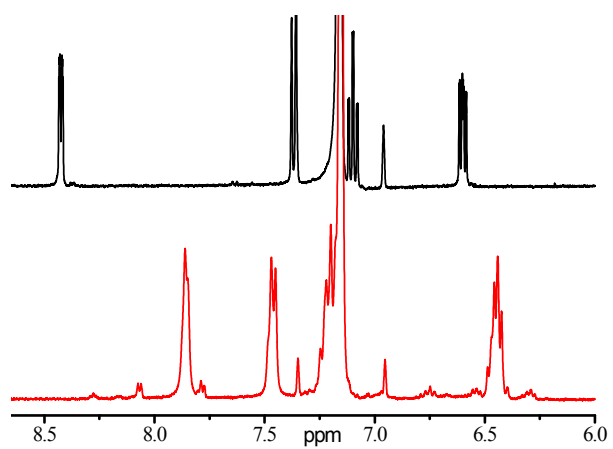

**Figure 4SI.**  $^1\text{H}$  NMR of the aromatic zone for *RR/SS-4* in  $\text{C}_6\text{D}_6$  (top) and  $\text{C}_6\text{D}_6 + 1$  eq. TFA (bottom).

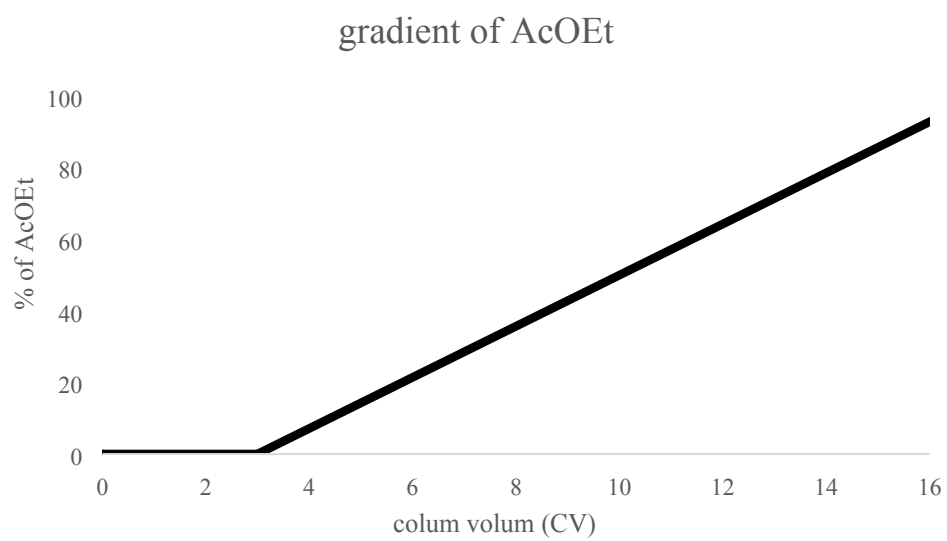

**Figure 5SI.** Gradient profile for the purification using Reveleris® machine.

**Free motions in the nitroxyl fragment.** The conformations of the nitroxide are controlled by *i*) the steric strain, *ii*) the hyperconjugation in the case of a strong electron acceptor bond such as the C—P bond of the diethylphosphoryl group carried by the nitroxide, and *iii*) the occurrence of IHB when the nitroxide carries H-donor groups such as a hydroxyl group and H-acceptor groups such as a diethylphosphoryl group. To address this issue, **2** and **3** were prepared via 3 routes (See Scheme 2): *i*) **3a**→**3b**→**3•**→**3**→**2**<sup>1</sup> with the protection of the hydroxyl group, which suppresses IHB in **3**, in the last step (**3**→**2**); *ii*) **3a**→**3b**→**2b**→**2•**→**2'**<sup>29</sup> with the protection of the hydroxyl group, which suppresses IHB, in the second step (**3b**→**2b**); *iii*) **3a**→**2a**→**2b**→**2•**→**2'**→**3'**<sup>29</sup> with the protection of the hydroxyl group in the starting materials **3a** suppressing the putative IHB which is regenerated in the last step (**2'**→**3'**).

### **Influence of IHB on $k_d$ .**

One must keep in mind that the suppression of the free hydroxyl group does not only suppress the effect of IHB, it also has an effect on the polarity and the steric strain, and the impact of each effect is different depending on its location on the alkyl or the nitroxyl fragment. Obviously, the bulkiness of SiMe<sub>2</sub>*t*-Bu, Me and MeCO is not the same and might induce very different strains, which might be enhanced or reduced depending on the configuration. Fortunately, it seems that in our models the steric effect due to the size of the protecting group can be disregarded (see articles on levelled steric effect and effect of the penultimate unit on  $k_d$ ). Moreover, the polar effect of electron withdrawing groups (EWG) also has an influence on  $k_d$ , thus the protecting groups are selected to afford either a weaker polar effect, as with CH<sub>2</sub>OSiMe<sub>2</sub>*t*-Bu ( $\sigma_1 = 0$ ), a stronger polar effect as with CH<sub>2</sub>OAc ( $\sigma_1 = 0.15$ ), or a similar polar effect, as with CH<sub>2</sub>OMe ( $\sigma_1 = 0.11$ ) compared with the OH group ( $\sigma_1 = 0.11$ ). However, this polar effect differs when it is applied on the alkyl of nitroxyl fragment. That is, a strong EWG carried by the nitroxyl affords, in general, a decrease in  $k_d$ , whereas when carried by the alkyl fragment it affords an increase in  $k_d$ .

Several types of IHB are possible – *intraR* and *interR*, and *intraN* and *interN* (Figure 4) – and are observed in **4** and **6** depending on the diastereoisomer. NMR data, X-ray and DFT calculations show that *interR* IHB occurs for diastereoisomers *RS/SR* of **6** and **9**, that *intraR* IHB occurs for *RR/SS*-**6**, that *intraN* IHBs occur for **3** and *RS/SR*-**4**, and for *RR/SS*-**4** both *intraN* and *interN* IHBs are reported. Thus, to determine various increments, alkoxyamines **3** for *intraN* IHB, **9** for *interR* IHB, **2** and **10** for the protected hydroxyl group, and **12** for the pyridyl moiety (see Table 4) were selected as reference models. As changes in  $E_a$  between diastereoisomers are due to small structural changes and as there is no reason for them to be the same for each diastereoisomer,  $E_a'$  values are estimated for each diastereoisomer to afford a range in which experimental data are expected to be observed. As seen in Table 4, differences between the closest  $E_a'$  values and the experimental  $E_a$  values are in the range 0.9 – 2.7 kJ/mol,<sup>2</sup> meaning that the group additivity approach still holds and provides rather accurate values.

**IHB in alkoxyamines.** The *interR* IHB in *RS/SR-6* observed by X-ray and NMR is nicely confirmed by DFT calculations. Conformer **A** is more stable than conformers **B** and **C** by 5 and 19 kJ/mol, respectively. Changes in NMR signals for diastereoisomer *RR/SS-6* are ascribed to *intraR* IHB, which is nicely supported by DFT calculations showing that conformer **B** is more stable than conformers **A** and **C** by 10 and 17 kJ/mol, respectively. Moreover, DFT calculations show that conformer **B** of *RR/SS-6* is less stable than conformer **A** of *RS/SR-6* by 14 kJ/mol, in good agreement with the 6.5 kJ/mol lower  $E_a$ . Changes in NMR signals for *RS/SR-4* (similar to those of **3**)<sup>3</sup> are ascribed to *intraN* IHB and supported by DFT calculations showing that conformer **A** is more stable than conformers **B** and **C** by 6.1 and 22.1 kJ/mol, respectively.

### **p*K*<sub>a</sub> measurement for 2-hydroxyethylpyridine.**

p*K*<sub>a</sub> values of 2-hydroxyethylpyridine was measured by monitoring the dependency of <sup>1</sup>H NMR chemical shift in various pH\*. A solution of 0.01 M 2-hydroxyethylpyridine in D<sub>2</sub>O/CD<sub>3</sub>OD (1/1) was used. The pH\* values were adjusted with DCl and NaOD and converted to pH values with the equation  $\text{pH} = 0.929 \text{ pH}^* + 0.42$ . <sup>1</sup>H-NMR spectra were recorded on 400 MHz spectrometer.

This procedure was applied to determine p*K*<sub>a</sub> values stored in Table 3.

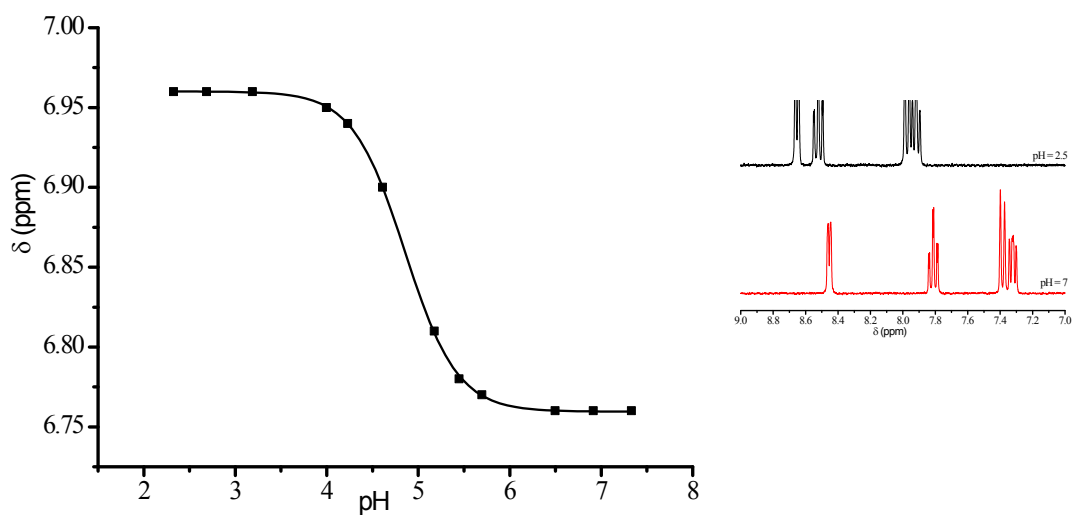

## **DFT calculation**

All calculations were performed using Gaussian package 09, revision A02.<sup>4</sup>

The geometry of the species were optimized at the M062X/6-31+G(d,p) level of theory. Vibrational frequencies were calculated at M062X/6-31+G(d,p) level to insure that the obtained geometries are minima (no imaginary frequency). The vibrational frequencies were scaled by a usual factor of 0.967. The corresponding thermal corrections were included to obtain the enthalpy and Gibbs free energy values under the standard conditions ( $p = 1$  atm and  $T = 298.15$  K). Values are given in u.a.



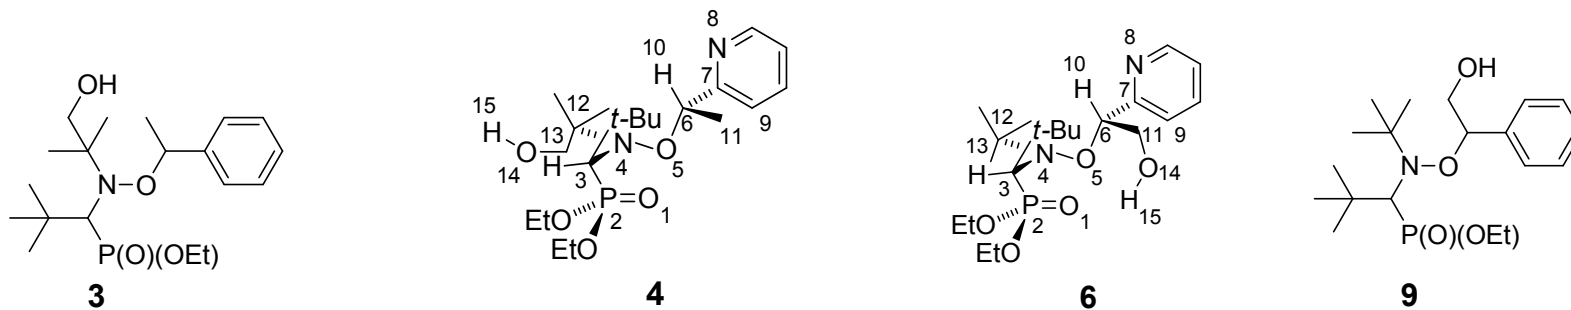

**Table 3SI.** Geometrical parameters for conformations **A**, **B**, and **C** of **3**, **4**, **6**, and **9**

|                                     | RR/SS-<br>3<br><i>Conf A</i> | RS/SR-<br>3<br><i>Conf A</i> | RR/SS-<br>4<br><i>Conf A</i> | RR/SS-<br>4<br><i>Conf B</i> | RR/SS-<br>4<br><i>Conf C</i> | RS/SR-<br>4<br><i>Conf A</i> | RS/SR-<br>4<br><i>Conf B</i> | RS/SR-<br>4<br><i>Conf C</i> | RR/SS-<br>6<br><i>Conf A</i> | RR/SS-<br>6<br><i>Conf B</i> | RR/SS-<br>6<br><i>Conf C</i> | RS/SR-<br>6<br><i>Conf A</i> | RS/SR-<br>6<br><i>Conf B</i> | RS/SR-<br>6<br><i>Conf C</i> | RR/SS-<br>9<br><i>Conf C</i> | RS/SR-<br>9<br><i>Conf A</i> | RS/SR-<br>4<br>RX | RR/SS-<br>6<br>RX |
|-------------------------------------|------------------------------|------------------------------|------------------------------|------------------------------|------------------------------|------------------------------|------------------------------|------------------------------|------------------------------|------------------------------|------------------------------|------------------------------|------------------------------|------------------------------|------------------------------|------------------------------|-------------------|-------------------|
| bond length $l(\text{\AA})$         |                              |                              |                              |                              |                              |                              |                              |                              |                              |                              |                              |                              |                              |                              |                              |                              |                   |                   |
| O5–C6                               | 1.435                        | 1.430                        | 1.433                        | 1.439                        | 1.439                        | 1.430                        | 1.435                        | 1.435                        | 1.448                        | 1.423                        | 1.425                        | 1.431                        | 1.430                        | 1.443                        | 1.432                        | 1.442                        | 1.447             | 1.450             |
| N4–O5                               | 1.426                        | 1.422                        | 1.426                        | 1.431                        | 1.429                        | 1.425                        | 1.424                        | 1.426                        | 1.431                        | 1.427                        | 1.435                        | 1.434                        | 1.431                        | 1.440                        | 1.435                        | 1.435                        | 1.460             | 1.462             |
| C3–P2                               | 1.849                        | 1.855                        | 1.845                        | 1.850                        | 1.851                        | 1.851                        | 1.850                        | 1.850                        | 1.858                        | 1.849                        | 1.857                        | 1.853                        | 1.859                        | 1.861                        | 1.854                        | 1.849                        | 1.835             | 1.837             |
| P2–O1                               | 1.491                        | 1.489                        | 1.492                        | 1.486                        | 1.485                        | 1.493                        | 1.487                        | 1.484                        | 1.493                        | 1.485                        | 1.484                        | 1.492                        | 1.487                        | 1.486                        | 1.486                        | 1.492                        | 1.468             | 1.467             |
| distance $d(\text{\AA})$            |                              |                              |                              |                              |                              |                              |                              |                              |                              |                              |                              |                              |                              |                              |                              |                              |                   |                   |
| N4----C6                            | 2.418                        | 2.411                        | 2.416                        | 2.394                        | 2.400                        | 2.406                        | 2.426                        | 2.410                        | 2.490                        | 2.396                        | 2.411                        | 2.427                        | 2.392                        | 2.462                        | 2.406                        | 2.426                        | 2.405             | 2.427             |
| O1----C7                            | 4.886                        | 4.279                        | 4.820                        | 5.147                        | 5.180                        | 4.080                        | 3.520                        | 4.509                        | 5.215                        | 4.064                        | 3.854                        | 5.177                        | 4.752                        | 4.078                        | 3.607                        | 5.278                        | 4.773             | 5.200             |
| valence angle<br>$\alpha(^{\circ})$ |                              |                              |                              |                              |                              |                              |                              |                              |                              |                              |                              |                              |                              |                              |                              |                              |                   |                   |
| <N4O5C6>                            | 115.34                       | 115.38                       | 115.34                       | 113.03                       | 113.61                       | 115.04                       | 116.07                       | 114.73                       | 119.75                       | 114.21                       | 114.91                       | 115.78                       | 113.52                       | 117.32                       | 114.14                       | 115.03                       | 111.66            | 112.88            |
| <C3N4O5>                            | 107.19                       | 107.86                       | 106.75                       | 107.90                       | 107.96                       | 108.64                       | 108.52                       | 109.30                       | 106.13                       | 105.56                       | 108.24                       | 106.04                       | 107.73                       | 105.36                       | 108.56                       | 107.07                       | 107.69            | 107.32            |
| torsion angle<br>$\theta(^{\circ})$ |                              |                              |                              |                              |                              |                              |                              |                              |                              |                              |                              |                              |                              |                              |                              |                              |                   |                   |
| <O5C6C7C9>                          | -142.45                      | 158.16                       | -35.37                       | -58.52                       | -41.82                       | -9.79                        | -125.83                      | 28.21                        | -63.15                       | -14.74                       | 132.67                       | -135.59                      | -94.56                       | 49.38                        | -60.26                       | 51.77                        | -13.64            | -47.39            |

|                            |              |              |              |          |          |                                                                |          |          |          |              |          |               |          |          |              |               |          |          |
|----------------------------|--------------|--------------|--------------|----------|----------|----------------------------------------------------------------|----------|----------|----------|--------------|----------|---------------|----------|----------|--------------|---------------|----------|----------|
| <C6O5N4nσ,N4> <sup>a</sup> | 2.66         | -17.88       | 4.59         | -1.82    | -0.07    | 21.72                                                          | 12.82    | 17.98    | 11.19    | 19.27        | 9.11     | 6.15          | -16.04   | 21.89    | -21.7        | 2.51          | -5.56    | 4.2      |
| <O1P2C3N4>                 | 94.08        | 48.49        | -42.85       | 87.00    | 87.56    | -49.32                                                         | 76.79    | 84.56    | -87.90   | -81.30       | -95.06   | -86.61        | -78.85   | -89.72   | -81.15       | -86.39        | 73.19    | 85.85    |
| <C7C6O5N4>                 | 114.81       | 174.73       | -116.87      | -112.07  | -113.47  | 173.51                                                         | -177.46  | -167.99  | 26.69    | -113.26      | -93.15   | 104.99        | 66.83    | -165.36  | -179.46      | 101.88        |          | 134.84   |
| <b>Δ G(kJ/mol)</b>         | <b>88.09</b> | <b>94.92</b> | <b>85.67</b> | <b>-</b> | <b>-</b> | <b>91.44</b>                                                   | <b>-</b> | <b>-</b> | <b>-</b> | <b>86.60</b> | <b>-</b> | <b>100.41</b> | <b>-</b> | <b>-</b> | <b>89.83</b> | <b>107.63</b> | <b>-</b> | <b>-</b> |
| <sup>a</sup> <nNOC>        | =            |              |              |          |          | <C <sub>6</sub> O <sub>5</sub> N <sub>4</sub> C <sub>3</sub> > |          |          |          |              | -        |               |          |          |              |               |          |          |

RS/SR-3 Conf A

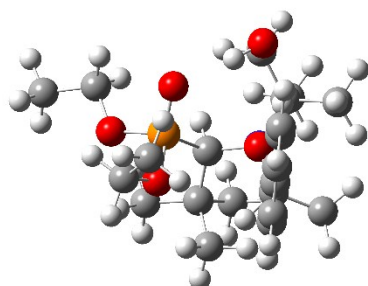

ZPE = 0.562316  
E = -1594.252976  
H = -1594.252031  
G = -1594.346752

|   |           |           |           |
|---|-----------|-----------|-----------|
| P | 1.082193  | -1.072335 | -0.318103 |
| O | -0.749497 | 0.864453  | -0.081953 |
| N | 0.460628  | 1.580447  | 0.133315  |
| O | 2.441242  | -1.947091 | -0.243168 |
| O | 0.556692  | -1.093240 | -1.710850 |
| O | 0.199630  | -1.786080 | 0.803525  |
| C | 1.539208  | 0.591091  | 0.363578  |
| C | -1.641916 | 0.819433  | 1.034216  |
| C | 0.624710  | 2.502555  | -1.046918 |
| C | -0.590331 | 3.429161  | -1.088134 |
| C | -2.886508 | 0.130633  | 0.516126  |
| C | 2.117674  | 0.641683  | 1.824807  |
| C | -3.754366 | -0.478760 | 1.426569  |
| C | 0.761436  | 1.802790  | -2.417072 |
| C | 1.077012  | 0.368381  | 2.915581  |
| O | -0.400126 | 1.164228  | -2.874120 |
| C | -3.188767 | 0.096390  | -0.847215 |
| C | 3.357852  | -1.899851 | -1.348931 |
| C | 2.667134  | 2.055081  | 2.063725  |
| C | 1.875490  | 3.361183  | -0.838193 |
| C | -4.339902 | -0.556636 | -1.288223 |
| C | -4.906686 | -1.123760 | 0.985071  |
| C | -1.959275 | 2.187888  | 1.625680  |
| C | -0.283771 | -3.129485 | 0.539260  |
| C | 3.281300  | -0.347706 | 1.992491  |
| C | 4.448540  | -2.915066 | -1.083718 |
| C | -5.198700 | -1.170026 | -0.378463 |
| C | -1.593979 | -3.105253 | -0.221778 |
| H | 2.391093  | 0.850673  | -0.284660 |
| H | -1.201782 | 0.176395  | 1.804719  |
| H | -1.504599 | 2.864385  | -1.272842 |
| H | -0.464951 | 4.144722  | -1.906576 |
| H | -0.680460 | 3.985471  | -0.150717 |
| H | -3.516108 | -0.462203 | 2.488406  |
| H | 1.008589  | 2.586082  | -3.145151 |
| H | 1.611017  | 1.102573  | -2.399698 |
| H | 0.305952  | 1.143668  | 2.919633  |
| H | 1.576438  | 0.394989  | 3.890350  |
| H | 0.607420  | -0.610680 | 2.799268  |
| H | -2.511733 | 0.561391  | -1.558582 |
| H | 2.810770  | -2.112183 | -2.271849 |

|   |           |           |           |
|---|-----------|-----------|-----------|
| H | 3.778671  | -0.886857 | -1.422644 |
| H | 1.873539  | 2.800443  | 1.971752  |
| H | 3.469858  | 2.304174  | 1.360842  |
| H | 3.077887  | 2.115805  | 3.076830  |
| H | 1.827012  | 3.900311  | 0.109834  |
| H | 1.930513  | 4.098721  | -1.643557 |
| H | 2.805606  | 2.784449  | -0.865993 |
| H | -4.561319 | -0.589221 | -2.350756 |
| H | -5.570294 | -1.597814 | 1.702075  |
| H | -1.038405 | 2.717493  | 1.883259  |
| H | -2.556433 | 2.053377  | 2.532660  |
| H | -2.536665 | 2.790965  | 0.920526  |
| H | 0.491911  | -3.679582 | -0.003946 |
| H | -0.395858 | -3.580667 | 1.527431  |
| H | 2.944719  | -1.385764 | 2.023884  |
| H | 3.798486  | -0.126439 | 2.931975  |
| H | 4.011490  | -0.255563 | 1.178769  |
| H | 5.172549  | -2.909188 | -1.902948 |
| H | 4.020520  | -3.917279 | -1.002504 |
| H | 4.970838  | -2.684041 | -0.151559 |
| H | -6.090857 | -1.680927 | -0.727515 |
| H | -1.925369 | -4.133053 | -0.401008 |
| H | -1.467509 | -2.599967 | -1.182073 |
| H | -2.367394 | -2.583175 | 0.347085  |
| H | -0.372900 | 0.263885  | -2.504612 |

#### RR/SS-3 Conf A

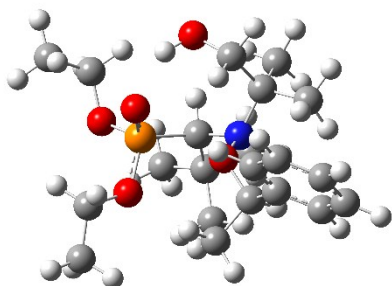

ZPE = 0.561536  
E = -1594.252407  
H = -1594.251463  
G = -1594.347957

|   |           |           |           |
|---|-----------|-----------|-----------|
| P | 1.749030  | -0.470299 | -0.517708 |
| O | -0.875092 | -0.125163 | 0.064405  |
| O | 3.356093  | -0.298231 | -0.554866 |
| O | 1.617047  | -1.885714 | 0.209801  |
| O | 1.176157  | -0.396093 | -1.892806 |
| O | 0.816733  | 2.276214  | -2.056644 |
| N | -0.278802 | 1.043478  | 0.623010  |
| C | -0.537651 | 2.140606  | -1.667352 |
| C | -0.745378 | 2.246458  | -0.149338 |
| C | -3.237142 | -0.663222 | 0.186676  |
| C | -2.248617 | 2.395806  | 0.107627  |
| C | -4.397009 | -0.442728 | 0.927879  |

|   |           |           |           |
|---|-----------|-----------|-----------|
| C | 1.177339  | 0.796186  | 0.702018  |
| C | -0.050914 | 3.505328  | 0.376674  |
| C | -1.887659 | -0.744248 | 0.871024  |
| C | -5.642131 | -0.406008 | 0.300401  |
| C | 3.943469  | 0.663205  | -1.452785 |
| C | -3.333589 | -0.857975 | -1.194133 |
| C | 1.663140  | 0.615469  | 2.184162  |
| C | -1.503777 | -2.211391 | 1.052380  |
| C | -4.574932 | -0.815991 | -1.823321 |
| C | 1.334446  | 1.912467  | 2.937934  |
| C | -5.732867 | -0.589823 | -1.077501 |
| C | 3.182152  | 0.401063  | 2.254683  |
| C | 1.799341  | -3.072955 | -0.590212 |
| C | 4.301795  | 0.007840  | -2.772133 |
| C | 0.964662  | -0.536358 | 2.911689  |
| C | 1.767710  | -4.260077 | 0.347215  |
| H | -0.942313 | 1.182575  | -2.013375 |
| H | -1.112761 | 2.949452  | -2.137311 |
| H | -2.833232 | 1.666352  | -0.455490 |
| H | -2.576694 | 3.393872  | -0.196748 |
| H | -2.465574 | 2.270648  | 1.173601  |
| H | -4.324990 | -0.282343 | 2.001646  |
| H | 1.697496  | 1.686571  | 0.325421  |
| H | 1.026268  | 3.508721  | 0.202262  |
| H | -0.250552 | 3.650483  | 1.440729  |
| H | -0.457699 | 4.363248  | -0.166687 |
| H | -1.928618 | -0.219702 | 1.832261  |
| H | -6.538340 | -0.223348 | 0.885637  |
| H | 3.258627  | 1.507468  | -1.603031 |
| H | 4.831958  | 1.034255  | -0.934395 |
| H | -2.424495 | -1.014147 | -1.770673 |
| H | -0.551762 | -2.306361 | 1.574137  |
| H | -1.408553 | -2.677401 | 0.065361  |
| H | -2.285991 | -2.738752 | 1.605945  |
| H | -4.640511 | -0.956509 | -2.898047 |
| H | 1.836661  | 2.777166  | 2.489883  |
| H | 1.673731  | 1.825626  | 3.975330  |
| H | 0.256876  | 2.096376  | 2.942910  |
| H | -6.699812 | -0.553392 | -1.569642 |
| H | 3.723818  | 1.170998  | 1.693099  |
| H | 3.483592  | -0.573308 | 1.863893  |
| H | 3.497533  | 0.462199  | 3.301623  |
| H | 0.996108  | -3.114266 | -1.332231 |
| H | 2.758963  | -3.002499 | -1.114809 |
| H | 4.794130  | 0.730940  | -3.429090 |
| H | 3.398425  | -0.361150 | -3.263387 |
| H | 4.983852  | -0.829874 | -2.602611 |
| H | -0.119734 | -0.396083 | 2.909284  |
| H | 1.294587  | -0.549573 | 3.956388  |
| H | 1.206575  | -1.502922 | 2.465702  |
| H | 1.903943  | -5.185998 | -0.218074 |
| H | 0.808193  | -4.309673 | 0.868808  |
| H | 2.566070  | -4.182040 | 1.089519  |
| H | 1.098570  | 1.382518  | -2.313937 |

**RS/SR- 4- Conf C**

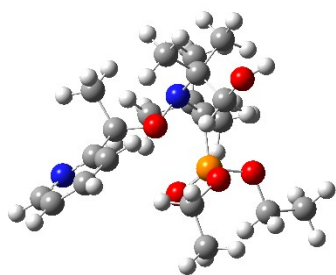

ZPE = 0.549867  
 E = -1610.294294  
 H = -1610.293349  
 G = -1610.390483

|   |           |           |           |
|---|-----------|-----------|-----------|
| P | -1.305593 | 1.057229  | -0.121389 |
| O | 0.875223  | -0.607896 | 0.027576  |
| O | -0.263646 | -2.031958 | 3.707416  |
| H | -1.136596 | -2.366268 | 3.935311  |
| O | -0.729135 | 1.838713  | -1.244136 |
| O | -2.847404 | 1.374549  | 0.231110  |
| O | -0.620922 | 1.374435  | 1.297859  |
| N | -0.221354 | -1.518235 | -0.035199 |
| N | 3.612349  | 0.738638  | -1.767793 |
| C | 1.721762  | -0.606564 | -1.131691 |
| C | 2.959429  | 0.178176  | -0.745747 |
| C | 3.416531  | 0.247048  | 0.573711  |
| H | 2.845441  | -0.220794 | 1.368247  |
| C | 4.594998  | 0.937472  | 0.834813  |
| H | 4.974451  | 1.012751  | 1.849615  |
| C | 5.278410  | 1.527534  | -0.224647 |
| H | 6.200888  | 2.076267  | -0.069094 |
| C | 4.743856  | 1.394797  | -1.504364 |
| H | 5.245251  | 1.840089  | -2.360534 |
| C | -0.210361 | -2.269904 | 1.261433  |
| C | -1.347876 | -3.295304 | 1.281484  |
| H | -2.343655 | -2.841130 | 1.299179  |
| H | -1.243785 | -3.907419 | 2.181680  |
| H | -1.286120 | -3.963182 | 0.420322  |
| C | 1.106455  | -3.042403 | 1.356817  |
| H | 1.190643  | -3.750524 | 0.527300  |
| H | 1.129333  | -3.590274 | 2.301302  |
| H | 1.965690  | -2.369643 | 1.332324  |
| C | -0.337515 | -1.326670 | 2.476286  |
| H | 0.494094  | -0.618292 | 2.471234  |
| H | -1.264770 | -0.743102 | 2.420642  |
| C | -1.460295 | -0.771401 | -0.357731 |
| H | -2.239145 | -1.050967 | 0.362279  |
| C | -2.037672 | -1.137450 | -1.774757 |
| C | -2.338951 | -2.641359 | -1.795773 |
| H | -1.427035 | -3.222514 | -1.632693 |
| H | -2.745760 | -2.915113 | -2.774875 |
| H | -3.077389 | -2.919698 | -1.035237 |
| C | -1.070792 | -0.835246 | -2.925469 |
| H | -0.782228 | 0.218306  | -2.949277 |
| H | -1.567194 | -1.078550 | -3.871494 |
| H | -0.175571 | -1.457629 | -2.859727 |
| C | -3.352550 | -0.384426 | -2.035692 |

|   |           |           |           |
|---|-----------|-----------|-----------|
| H | -4.058277 | -0.492473 | -1.205252 |
| H | -3.816350 | -0.793872 | -2.939040 |
| H | -3.184033 | 0.683758  | -2.201058 |
| C | -3.241084 | 2.753183  | 0.339814  |
| H | -2.820692 | 3.310361  | -0.505119 |
| H | -2.828704 | 3.159512  | 1.271016  |
| C | -4.754267 | 2.801634  | 0.336577  |
| H | -5.144930 | 2.385631  | -0.595624 |
| H | -5.097245 | 3.835763  | 0.428967  |
| H | -5.157323 | 2.223813  | 1.172172  |
| C | 0.623951  | 2.094882  | 1.351338  |
| H | 1.181392  | 1.929847  | 0.426921  |
| H | 1.183188  | 1.656356  | 2.183499  |
| C | 0.354549  | 3.569922  | 1.569272  |
| H | -0.177088 | 3.981234  | 0.706202  |
| H | 1.298703  | 4.111176  | 1.681984  |
| H | -0.246712 | 3.724987  | 2.469727  |
| C | 2.133624  | -1.993696 | -1.614506 |
| H | 2.787613  | -2.481939 | -0.886723 |
| H | 1.258716  | -2.624394 | -1.783896 |
| H | 2.683727  | -1.876243 | -2.551954 |
| H | 1.222240  | -0.051187 | -1.932148 |

#### RS/SR- 4- Conf A

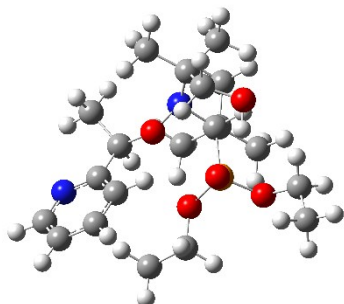

ZPE = 0.551488  
E = -1610.306542  
H = -1610.305598  
G = -1610.398935

|   |           |           |           |
|---|-----------|-----------|-----------|
| P | 0.766152  | -1.210795 | 0.161619  |
| O | -0.497670 | 1.156081  | 0.341184  |
| O | 2.280222  | 0.553127  | 2.523878  |
| H | 1.771604  | -0.272729 | 2.483195  |
| O | 0.436272  | -1.222074 | 1.618647  |
| O | -0.442248 | -1.539585 | -0.828608 |
| O | 1.792502  | -2.405557 | -0.187472 |
| N | 0.809258  | 1.545153  | -0.073123 |
| N | -3.882960 | 0.871021  | -0.745013 |
| C | -1.518000 | 1.321443  | -0.643657 |
| C | -2.760783 | 0.696932  | -0.037457 |
| C | -2.715765 | -0.057783 | 1.140143  |
| H | -1.775752 | -0.191521 | 1.666081  |
| C | -3.892512 | -0.651585 | 1.586926  |
| H | -3.890641 | -1.247738 | 2.494894  |

|   |           |           |           |
|---|-----------|-----------|-----------|
| C | -5.063804 | -0.477226 | 0.855736  |
| H | -6.001768 | -0.923400 | 1.168402  |
| C | -5.001883 | 0.295256  | -0.302376 |
| H | -5.892301 | 0.459842  | -0.905294 |
| C | 1.367283  | 2.336048  | 1.080911  |
| C | 2.805389  | 2.767246  | 0.792278  |
| H | 3.494383  | 1.924977  | 0.708726  |
| H | 3.149421  | 3.370965  | 1.637378  |
| H | 2.863344  | 3.379264  | -0.110157 |
| C | 0.506274  | 3.594482  | 1.219331  |
| H | 0.466151  | 4.133170  | 0.268773  |
| H | 0.943054  | 4.256513  | 1.972632  |
| H | -0.512238 | 3.347231  | 1.527231  |
| C | 1.323614  | 1.592670  | 2.427351  |
| H | 1.538722  | 2.328316  | 3.213573  |
| H | 0.312534  | 1.202704  | 2.587537  |
| C | 1.556242  | 0.329842  | -0.492951 |
| H | 2.512287  | 0.307776  | 0.049319  |
| C | 1.936848  | 0.356808  | -2.019243 |
| C | 0.736165  | 0.447946  | -2.966920 |
| H | 0.047101  | -0.391818 | -2.847119 |
| H | 1.104248  | 0.440245  | -3.998751 |
| H | 0.194874  | 1.387054  | -2.819388 |
| C | 2.778969  | -0.870303 | -2.402681 |
| H | 3.595189  | -1.036940 | -1.689641 |
| H | 3.223726  | -0.697943 | -3.388164 |
| H | 2.184149  | -1.784408 | -2.451060 |
| C | 2.796988  | 1.606129  | -2.258931 |
| H | 2.239458  | 2.512573  | -2.010135 |
| H | 3.075834  | 1.654132  | -3.316793 |
| H | 3.719144  | 1.584271  | -1.668292 |
| C | -1.278086 | -2.684082 | -0.537123 |
| H | -1.569631 | -2.641621 | 0.517543  |
| H | -0.686095 | -3.589237 | -0.710415 |
| C | -2.482996 | -2.617072 | -1.449252 |
| H | -3.061900 | -1.709524 | -1.256649 |
| H | -3.126607 | -3.483485 | -1.272606 |
| H | -2.171993 | -2.621101 | -2.497305 |
| C | 2.810722  | -2.769018 | 0.763939  |
| H | 3.114959  | -1.889129 | 1.344093  |
| H | 3.664323  | -3.091035 | 0.161344  |
| C | 2.316644  | -3.878309 | 1.671087  |
| H | 1.466651  | -3.527258 | 2.260808  |
| H | 3.115374  | -4.192653 | 2.349329  |
| H | 2.007140  | -4.741148 | 1.074912  |
| C | -1.726389 | 2.762589  | -1.077249 |
| H | -2.058390 | 3.380291  | -0.238393 |
| H | -0.791277 | 3.166297  | -1.473925 |
| H | -2.493591 | 2.789829  | -1.853202 |
| H | -1.270009 | 0.707926  | -1.516014 |

**RS/SR- 4- Conf B**



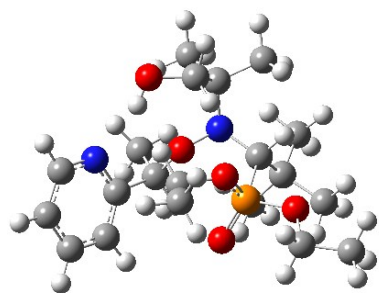

ZPE = 0.551438  
 E = -1610.302742  
 H = -1610.301798  
 G = -1610.396619

|   |           |           |           |
|---|-----------|-----------|-----------|
| P | -1.189429 | 1.059338  | -0.034476 |
| O | 0.743403  | -0.786076 | -0.040327 |
| O | 1.957999  | -1.499126 | 2.336395  |
| H | 2.210528  | -1.139991 | 1.469102  |
| O | -0.570035 | 1.641510  | -1.255047 |
| O | -2.639412 | 1.649216  | 0.344284  |
| O | -0.402170 | 1.392054  | 1.326028  |
| N | -0.418641 | -1.597391 | 0.105375  |
| N | 3.353832  | -0.236187 | -0.076912 |
| C | 1.376787  | -0.816733 | -1.328138 |
| C | 2.581060  | 0.077785  | -1.122943 |
| C | 2.839414  | 1.166945  | -1.953619 |
| H | 2.155828  | 1.403388  | -2.762680 |
| C | 3.955674  | 1.955251  | -1.685958 |
| H | 4.184101  | 2.815250  | -2.308073 |
| C | 4.760073  | 1.635928  | -0.595893 |
| H | 5.632827  | 2.228240  | -0.343801 |
| C | 4.413077  | 0.530968  | 0.180612  |
| H | 5.005523  | 0.250979  | 1.048277  |
| C | -0.216070 | -2.337660 | 1.406734  |
| C | -1.553156 | -2.727734 | 2.043361  |
| H | -2.047539 | -1.877723 | 2.525758  |
| H | -1.354302 | -3.470882 | 2.819661  |
| H | -2.239242 | -3.175857 | 1.323763  |
| C | 0.567178  | -3.607514 | 1.076884  |
| H | -0.010476 | -4.240747 | 0.395550  |
| H | 0.777073  | -4.164488 | 1.995360  |
| H | 1.526163  | -3.366141 | 0.619148  |
| C | 0.556909  | -1.511544 | 2.465637  |
| H | 0.133542  | -0.498300 | 2.496493  |
| H | 0.362544  | -1.977897 | 3.438261  |
| C | -1.615211 | -0.740883 | -0.066796 |
| H | -2.284328 | -0.849812 | 0.794101  |
| C | -2.455142 | -1.171981 | -1.324782 |
| C | -2.899509 | -2.627115 | -1.122224 |
| H | -2.038442 | -3.280168 | -0.946745 |
| H | -3.415950 | -2.977996 | -2.021894 |
| H | -3.597300 | -2.719333 | -0.282202 |
| C | -1.658944 | -1.098607 | -2.632151 |
| H | -1.288780 | -0.086941 | -2.820873 |
| H | -2.314922 | -1.384848 | -3.461592 |
| H | -0.820221 | -1.800016 | -2.618830 |

|   |           |           |           |
|---|-----------|-----------|-----------|
| C | -3.718529 | -0.310007 | -1.476203 |
| H | -4.273150 | -0.231913 | -0.535291 |
| H | -4.371322 | -0.771567 | -2.224732 |
| H | -3.484330 | 0.703842  | -1.812150 |
| C | -2.796712 | 3.077581  | 0.369485  |
| H | -2.400064 | 3.492968  | -0.563290 |
| H | -2.216263 | 3.476977  | 1.209811  |
| C | -4.273108 | 3.373410  | 0.526501  |
| H | -4.835487 | 2.947914  | -0.308776 |
| H | -4.439957 | 4.453857  | 0.546543  |
| H | -4.652870 | 2.943654  | 1.456746  |
| C | 0.974643  | 1.818997  | 1.332923  |
| H | 1.324185  | 1.917200  | 0.301664  |
| H | 1.554491  | 1.035962  | 1.830756  |
| C | 1.063904  | 3.139169  | 2.069747  |
| H | 0.504291  | 3.914717  | 1.538611  |
| H | 2.109667  | 3.453820  | 2.138262  |
| H | 0.661573  | 3.045463  | 3.081891  |
| C | 1.786532  | -2.211200 | -1.773703 |
| H | 2.584972  | -2.595861 | -1.133721 |
| H | 0.931787  | -2.890907 | -1.733978 |
| H | 2.155207  | -2.165012 | -2.803128 |
| H | 0.714246  | -0.343814 | -2.057613 |

#### RR/SS- 4- Conf A

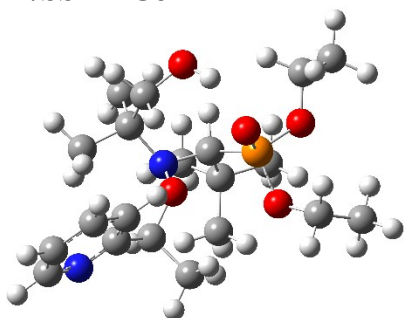

ZPE = 0.550053  
E = -1610.301356  
H = -1610.300412  
G = -1610.396737

|   |           |           |           |
|---|-----------|-----------|-----------|
| P | -1.661199 | -0.472248 | -0.486096 |
| O | 0.942029  | -0.167891 | 0.120365  |
| O | -0.607845 | 2.127112  | -2.206561 |
| H | -0.916775 | 1.226791  | -2.402821 |
| O | -1.066196 | -0.515001 | -1.853459 |
| O | -1.585347 | -1.825094 | 0.356484  |
| O | -3.263827 | -0.260138 | -0.577075 |
| N | 0.385938  | 1.062626  | 0.578734  |
| N | 4.364260  | -0.651254 | 0.981168  |
| C | 1.943351  | -0.742272 | 0.969142  |
| H | 2.061897  | -0.120266 | 1.861381  |
| C | 3.268393  | -0.800258 | 0.235196  |
| C | 3.307166  | -1.057371 | -1.139782 |
| H | 2.376252  | -1.166651 | -1.689031 |

|   |           |           |           |
|---|-----------|-----------|-----------|
| C | 4.545460  | -1.138430 | -1.762865 |
| H | 4.614469  | -1.327432 | -2.829994 |
| C | 5.696974  | -0.971517 | -0.994695 |
| H | 6.685514  | -1.023853 | -1.437859 |
| C | 5.549991  | -0.736402 | 0.368925  |
| H | 6.423357  | -0.605441 | 1.003751  |
| C | 1.524041  | -2.168617 | 1.319018  |
| H | 0.589772  | -2.179700 | 1.879456  |
| H | 2.312869  | -2.649823 | 1.904105  |
| H | 1.379370  | -2.736181 | 0.393514  |
| C | 0.915365  | 2.185249  | -0.267774 |
| C | 0.261489  | 3.504717  | 0.149543  |
| H | -0.810219 | 3.535512  | -0.052955 |
| H | 0.715249  | 4.305228  | -0.441986 |
| H | 0.441793  | 3.716933  | 1.205514  |
| C | 2.418591  | 2.293858  | 0.013839  |
| H | 2.612469  | 2.226604  | 1.088784  |
| H | 2.792647  | 3.256119  | -0.347139 |
| H | 2.985288  | 1.510084  | -0.492338 |
| C | 0.732901  | 1.976760  | -1.778255 |
| H | 1.344746  | 2.729925  | -2.292529 |
| H | 1.111468  | 0.983227  | -2.044920 |
| C | -1.077867 | 0.870883  | 0.642597  |
| H | -1.562083 | 1.742964  | 0.183604  |
| C | -1.595516 | 0.819431  | 2.123936  |
| C | -0.920778 | -0.273647 | 2.955477  |
| H | -1.174840 | -1.270541 | 2.591359  |
| H | -1.259647 | -0.191954 | 3.994154  |
| H | 0.165638  | -0.149649 | 2.949714  |
| C | -3.117289 | 0.624615  | 2.183670  |
| H | -3.643062 | 1.348626  | 1.550545  |
| H | -3.450303 | 0.773468  | 3.216223  |
| H | -3.418994 | -0.377576 | 1.869651  |
| C | -1.264580 | 2.170373  | 2.774558  |
| H | -0.184378 | 2.336490  | 2.794628  |
| H | -1.630678 | 2.175037  | 3.806432  |
| H | -1.740024 | 3.002690  | 2.243592  |
| C | -2.079172 | -3.043140 | -0.242899 |
| H | -1.310461 | -3.796969 | -0.054595 |
| H | -2.167775 | -2.908073 | -1.326294 |
| C | -3.403734 | -3.417990 | 0.390632  |
| H | -3.288232 | -3.531304 | 1.472045  |
| H | -3.763397 | -4.365326 | -0.021669 |
| H | -4.147064 | -2.640998 | 0.196328  |
| C | -3.801990 | 0.642492  | -1.562666 |
| H | -3.095198 | 1.460688  | -1.750658 |
| H | -4.698396 | 1.067479  | -1.102576 |
| C | -4.133316 | -0.100812 | -2.842194 |
| H | -3.222254 | -0.512461 | -3.282483 |
| H | -4.600405 | 0.578981  | -3.560895 |
| H | -4.829405 | -0.917953 | -2.632373 |

**RR/SS- 4- Conf B**

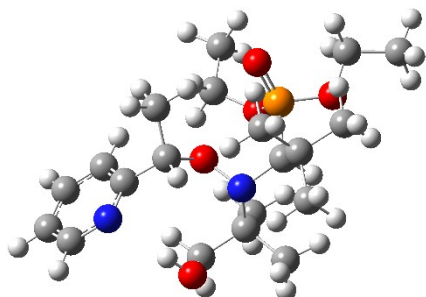

ZPE = 0.550836

E = 1610.301139

H = -1610.300194

G = -1610.395771

|   |           |           |           |
|---|-----------|-----------|-----------|
| P | -1.981661 | 0.606631  | -0.192932 |
| O | 0.719622  | 0.212821  | -0.181041 |
| O | 2.729195  | -2.360938 | 0.932794  |
| H | 3.123092  | -1.997664 | 0.125311  |
| O | -1.996714 | 1.163110  | -1.570660 |
| O | -3.434102 | 0.316031  | 0.444142  |
| O | -1.395616 | 1.636058  | 0.896668  |
| N | 0.221516  | -1.044169 | 0.287627  |
| N | 4.013215  | -0.420620 | -0.858431 |
| C | 1.667788  | 0.077509  | -1.255090 |
| H | 1.718157  | -0.979357 | -1.528063 |
| C | 3.046065  | 0.498632  | -0.783101 |
| C | 3.271839  | 1.786135  | -0.283365 |
| H | 2.450623  | 2.494219  | -0.225476 |
| C | 4.545647  | 2.121615  | 0.153499  |
| H | 4.748890  | 3.109548  | 0.555607  |
| C | 5.558687  | 1.166538  | 0.069479  |
| H | 6.569195  | 1.383026  | 0.397859  |
| C | 5.240803  | -0.086108 | -0.442132 |
| H | 5.995557  | -0.864780 | -0.515685 |
| C | 1.213454  | 0.934440  | -2.431330 |
| H | 0.176597  | 0.715823  | -2.687837 |
| H | 1.861853  | 0.747245  | -3.292620 |
| H | 1.280388  | 1.999101  | -2.186294 |
| C | 0.671363  | -1.246769 | 1.700232  |
| C | 0.238298  | -0.126466 | 2.650073  |
| H | 0.597315  | 0.842572  | 2.294215  |
| H | 0.652122  | -0.311755 | 3.646684  |
| H | -0.849942 | -0.068390 | 2.742175  |
| C | 0.169996  | -2.601232 | 2.211745  |
| H | -0.918581 | -2.657824 | 2.288626  |
| H | 0.571157  | -2.749274 | 3.219028  |
| H | 0.534088  | -3.411781 | 1.579608  |
| C | 2.209573  | -1.313702 | 1.716614  |
| H | 2.624195  | -0.340540 | 1.429315  |
| H | 2.506878  | -1.493092 | 2.757839  |
| C | -1.237543 | -1.067940 | 0.059074  |
| H | -1.733428 | -1.413901 | 0.973619  |
| C | -1.653954 | -2.078502 | -1.068224 |
| C | -1.059978 | -1.729842 | -2.436955 |
| H | -1.413007 | -0.760805 | -2.796246 |

|   |           |           |           |
|---|-----------|-----------|-----------|
| H | -1.363546 | -2.496577 | -3.158501 |
| H | 0.032546  | -1.731263 | -2.402369 |
| C | -3.184322 | -2.136798 | -1.197691 |
| H | -3.665482 | -2.312165 | -0.229406 |
| H | -3.451029 | -2.960008 | -1.868654 |
| H | -3.595363 | -1.214148 | -1.618664 |
| C | -1.148341 | -3.470857 | -0.670398 |
| H | -0.060835 | -3.470585 | -0.558834 |
| H | -1.416803 | -4.189674 | -1.451745 |
| H | -1.599168 | -3.812124 | 0.268093  |
| C | -4.449677 | 1.319721  | 0.278479  |
| H | -4.523774 | 1.574223  | -0.784494 |
| H | -4.149951 | 2.216343  | 0.834609  |
| C | -5.749071 | 0.751364  | 0.807771  |
| H | -6.023559 | -0.148161 | 0.250825  |
| H | -6.550861 | 1.487177  | 0.701048  |
| H | -5.650760 | 0.490906  | 1.864530  |
| C | -0.605576 | 2.760635  | 0.486057  |
| H | -0.164572 | 2.559646  | -0.493524 |
| H | 0.197038  | 2.847467  | 1.225776  |
| C | -1.470379 | 4.005441  | 0.445864  |
| H | -2.243519 | 3.895457  | -0.320014 |
| H | -0.862819 | 4.881597  | 0.199441  |
| H | -1.948025 | 4.174021  | 1.414988  |

#### RR/SS- 4- Conf C

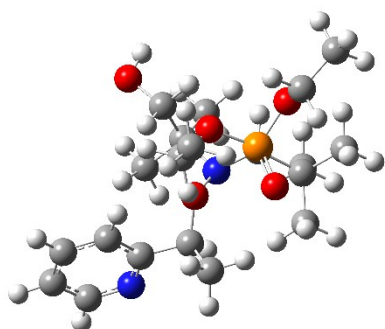

ZPE = 0.549736  
E = -1610.294114  
H = -1610.293170  
G = -1610.390628

|   |           |           |           |
|---|-----------|-----------|-----------|
| P | -1.871954 | 0.637605  | -0.314353 |
| O | 0.804547  | 0.053012  | -0.286544 |
| O | 0.788345  | -0.322123 | 3.859599  |
| H | 0.203996  | -0.890775 | 4.370783  |
| O | -1.854869 | 1.157532  | -1.705260 |
| O | -3.338460 | 0.455229  | 0.333066  |
| O | -1.213347 | 1.647269  | 0.751561  |
| N | 0.216554  | -1.147646 | 0.218980  |
| N | 4.166394  | -0.578575 | -1.230790 |
| C | 1.780828  | -0.173751 | -1.319413 |
| H | 1.794514  | -1.240596 | -1.553861 |
| C | 3.166954  | 0.218323  | -0.849168 |
| C | 3.367583  | 1.386761  | -0.106892 |
| H | 2.512436  | 1.991368  | 0.179925  |
| C | 4.659679  | 1.723710  | 0.271573  |

|   |           |           |           |
|---|-----------|-----------|-----------|
| H | 4.849615  | 2.617203  | 0.858697  |
| C | 5.709201  | 0.891126  | -0.115062 |
| H | 6.735672  | 1.110777  | 0.157528  |
| C | 5.408188  | -0.239641 | -0.867700 |
| H | 6.198232  | -0.912189 | -1.193429 |
| C | 1.407618  | 0.667991  | -2.536902 |
| H | 0.380261  | 0.476724  | -2.847287 |
| H | 2.096701  | 0.444275  | -3.356576 |
| H | 1.499923  | 1.733420  | -2.301023 |
| C | 0.662787  | -1.350824 | 1.633712  |
| C | 0.067806  | -2.657381 | 2.170098  |
| H | -1.023246 | -2.643102 | 2.248159  |
| H | 0.472064  | -2.832925 | 3.170845  |
| H | 0.361358  | -3.503261 | 1.545189  |
| C | 2.185875  | -1.503655 | 1.635079  |
| H | 2.497802  | -2.195844 | 0.846099  |
| H | 2.512503  | -1.890222 | 2.602438  |
| H | 2.683570  | -0.545583 | 1.482808  |
| C | 0.267253  | -0.174114 | 2.546193  |
| H | 0.695094  | 0.746653  | 2.143350  |
| H | -0.822789 | -0.047309 | 2.574965  |
| C | -1.240314 | -1.077101 | -0.019760 |
| H | -1.764259 | -1.374604 | 0.896002  |
| C | -1.714871 | -2.077362 | -1.133458 |
| C | -1.059597 | -1.808484 | -2.491357 |
| H | -1.324301 | -0.820173 | -2.873280 |
| H | -1.407039 | -2.560685 | -3.208308 |
| H | 0.028088  | -1.896257 | -2.425220 |
| C | -3.241613 | -2.012533 | -1.299819 |
| H | -3.758303 | -2.126495 | -0.340769 |
| H | -3.559583 | -2.825502 | -1.960735 |
| H | -3.563781 | -1.069301 | -1.750971 |
| C | -1.342894 | -3.498960 | -0.694176 |
| H | -0.260485 | -3.599938 | -0.579097 |
| H | -1.673936 | -4.211471 | -1.456870 |
| H | -1.827341 | -3.769961 | 0.250796  |
| C | -4.287709 | 1.519510  | 0.150334  |
| H | -4.304613 | 1.799673  | -0.908642 |
| H | -3.959049 | 2.384922  | 0.738374  |
| C | -5.637984 | 1.015889  | 0.613887  |
| H | -5.937839 | 0.144195  | 0.026499  |
| H | -6.392964 | 1.797168  | 0.491115  |
| H | -5.599114 | 0.729298  | 1.667793  |
| C | -0.383059 | 2.731402  | 0.306010  |
| H | 0.118923  | 2.446377  | -0.621889 |
| H | 0.366521  | 2.865240  | 1.092272  |
| C | -1.217569 | 3.981832  | 0.112291  |
| H | -1.943965 | 3.823213  | -0.689945 |
| H | -0.576254 | 4.824267  | -0.163717 |
| H | -1.748448 | 4.237121  | 1.033738  |

**RS/SR-6-conf A**

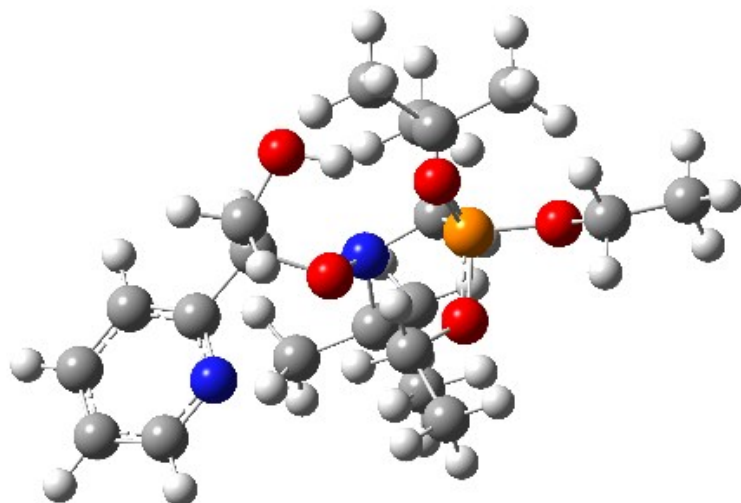

ZPE = 0.551235  
 E = -1610.303261  
 H = -1610.302317  
 G = -1610.396752

|   |           |           |           |
|---|-----------|-----------|-----------|
| C | -1.767948 | -0.359412 | -1.126104 |
| H | -1.700234 | -1.424050 | -1.372310 |
| C | -3.148372 | -0.013826 | -0.607842 |
| C | -4.493829 | 1.563735  | 0.363977  |
| H | -4.568595 | 2.556910  | 0.801229  |
| C | -5.618639 | 0.744957  | 0.281122  |
| H | -6.575416 | 1.089721  | 0.657602  |
| C | -5.475027 | -0.512061 | -0.299347 |
| H | -6.324402 | -1.182658 | -0.387946 |
| C | -4.218731 | -0.897380 | -0.754954 |
| H | -4.057540 | -1.873928 | -1.201985 |
| C | -1.539273 | 0.500876  | -2.380261 |
| H | -2.416251 | 0.378555  | -3.026963 |
| H | -1.518104 | 1.551509  | -2.053574 |
| C | 1.294024  | -1.042720 | 0.318464  |
| H | 1.794744  | -1.141208 | 1.288505  |
| C | 1.863714  | -2.197479 | -0.581703 |
| C | 1.247862  | -2.222084 | -1.981641 |
| H | 1.596255  | -3.119164 | -2.505798 |
| H | 1.533692  | -1.350964 | -2.570858 |
| H | 0.157270  | -2.263177 | -1.937898 |
| C | 1.546672  | -3.534925 | 0.100986  |
| H | 0.467322  | -3.675311 | 0.202041  |
| H | 2.008484  | -3.607837 | 1.091644  |
| H | 1.940722  | -4.352034 | -0.512064 |
| C | 3.390728  | -2.085213 | -0.714221 |
| H | 3.879520  | -2.008608 | 0.263150  |
| H | 3.687195  | -1.218982 | -1.312792 |
| H | 3.765177  | -2.982631 | -1.217746 |
| C | -0.611832 | -1.111629 | 1.958725  |
| C | 0.020255  | -2.293159 | 2.706644  |
| H | -0.252771 | -3.244654 | 2.244504  |
| H | -0.365148 | -2.288131 | 3.730016  |
| H | 1.109013  | -2.236639 | 2.776071  |

|   |           |           |           |
|---|-----------|-----------|-----------|
| C | -2.127787 | -1.322161 | 1.998462  |
| H | -2.665490 | -0.417046 | 1.717951  |
| H | -2.428134 | -1.581334 | 3.018212  |
| H | -2.422808 | -2.140498 | 1.333335  |
| C | -0.272408 | 0.197761  | 2.677352  |
| H | 0.805794  | 0.369791  | 2.748076  |
| H | -0.676836 | 0.158630  | 3.694245  |
| H | -0.723447 | 1.045779  | 2.156639  |
| C | 4.234310  | 1.662841  | 0.025407  |
| H | 4.280158  | 1.705245  | -1.067952 |
| H | 3.854358  | 2.620653  | 0.399691  |
| C | 5.581253  | 1.328449  | 0.628876  |
| H | 5.509371  | 1.272709  | 1.717899  |
| H | 6.311886  | 2.097907  | 0.364717  |
| H | 5.936470  | 0.365451  | 0.252945  |
| C | 0.178184  | 2.700997  | 0.093735  |
| H | -0.810299 | 2.255817  | 0.240397  |
| H | 0.359127  | 2.816915  | -0.979881 |
| C | 0.319697  | 4.017379  | 0.828357  |
| H | 0.170877  | 3.872854  | 1.902056  |
| H | -0.431260 | 4.724907  | 0.465560  |
| H | 1.311631  | 4.449137  | 0.669745  |
| N | -0.168990 | -1.148877 | 0.520150  |
| O | -0.746833 | -0.036724 | -0.176565 |
| O | -0.416891 | 0.148090  | -3.127038 |
| H | 0.388037  | 0.467268  | -2.675346 |
| O | 1.825996  | 0.915921  | -1.702985 |
| O | 3.316638  | 0.623783  | 0.409748  |
| O | 1.168028  | 1.799933  | 0.632177  |
| P | 1.843616  | 0.637144  | -0.236754 |
| N | -3.284900 | 1.205195  | -0.071679 |

### RS/SR-6-conf B

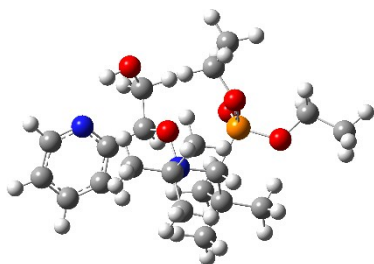

ZPE = 0.551420  
E = -1610.301290  
H = -1610.300346  
G = -1610.394815

|   |           |           |           |
|---|-----------|-----------|-----------|
| C | -1.439206 | 0.538875  | -1.178363 |
| H | -1.002409 | -0.201851 | -1.854275 |
| C | -2.873355 | 0.152841  | -0.863758 |
| C | -4.961826 | 0.833880  | -0.177997 |
| H | -5.599033 | 1.667801  | 0.105615  |
| C | -5.458732 | -0.467587 | -0.188250 |
| H | -6.487521 | -0.662964 | 0.093758  |
| C | -4.602805 | -1.492988 | -0.577256 |
| H | -4.948083 | -2.521953 | -0.608021 |



|   |           |           |           |
|---|-----------|-----------|-----------|
| C | -3.292341 | -1.178177 | -0.921047 |
| H | -2.592501 | -1.952429 | -1.213587 |
| C | -1.307949 | 1.898796  | -1.863565 |
| H | -0.260198 | 2.022172  | -2.151052 |
| H | -1.916951 | 1.871386  | -2.779721 |
| C | 0.941990  | -1.096031 | 0.339490  |
| H | 1.460930  | -1.315848 | 1.281110  |
| C | 0.987937  | -2.432068 | -0.493022 |
| C | 0.401098  | -2.312944 | -1.905743 |
| H | 0.595332  | -3.246888 | -2.444886 |
| H | 0.842732  | -1.486871 | -2.468888 |
| H | -0.682931 | -2.184659 | -1.870820 |
| C | 0.183842  | -3.503195 | 0.256182  |
| H | -0.849669 | -3.180298 | 0.408675  |
| H | 0.626991  | -3.738392 | 1.229681  |
| H | 0.174179  | -4.423646 | -0.337375 |
| C | 2.435105  | -2.938441 | -0.621699 |
| H | 2.960859  | -2.919159 | 0.338695  |
| H | 3.014742  | -2.344250 | -1.331934 |
| H | 2.413315  | -3.972006 | -0.982840 |
| C | -0.732687 | -0.409225 | 2.105199  |
| C | -0.598270 | -1.731166 | 2.866359  |
| H | -1.275464 | -2.489058 | 2.465339  |
| H | -0.866740 | -1.552125 | 3.911570  |
| H | 0.419665  | -2.129993 | 2.859058  |
| C | -2.186943 | 0.054441  | 2.228951  |
| H | -2.334947 | 1.025382  | 1.752634  |
| H | -2.438737 | 0.149259  | 3.289680  |
| H | -2.869677 | -0.671988 | 1.776350  |
| C | 0.174235  | 0.649327  | 2.746061  |
| H | 1.231471  | 0.370662  | 2.719623  |
| H | -0.115676 | 0.775685  | 3.794149  |
| H | 0.062998  | 1.609450  | 2.237375  |
| C | 4.572015  | 0.404149  | -0.518159 |
| H | 4.476886  | 0.524656  | -1.602842 |
| H | 4.588248  | 1.397279  | -0.053392 |
| C | 5.804256  | -0.396236 | -0.152977 |
| H | 5.874817  | -0.515719 | 0.931076  |
| H | 6.703401  | 0.114706  | -0.508231 |
| H | 5.761898  | -1.388272 | -0.610311 |
| C | 1.357382  | 2.809940  | 0.140260  |
| H | 0.273925  | 2.748523  | 0.264635  |
| H | 1.573602  | 2.976127  | -0.920012 |
| C | 1.966960  | 3.889064  | 1.009479  |
| H | 1.770889  | 3.684850  | 2.065934  |
| H | 1.526228  | 4.856869  | 0.754916  |
| H | 3.049205  | 3.946550  | 0.862978  |
| N | -0.440908 | -0.643681 | 0.646784  |
| O | -0.638979 | 0.619282  | 0.004544  |
| O | -1.660391 | 2.990319  | -1.043606 |
| H | -2.547564 | 2.799322  | -0.701068 |
| O | 1.758693  | 0.556507  | -1.847580 |
| O | 3.426600  | -0.312351 | -0.028725 |
| O | 1.949307  | 1.555751  | 0.542024  |
| P | 1.967447  | 0.264000  | -0.404927 |
| N | -3.706519 | 1.141123  | -0.507332 |

## RS/SR-6-conf C

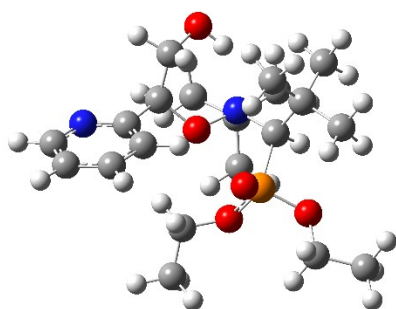

ZPE = 0.551853  
E = -1610.296035  
H = -1610.295091  
G = -1610.389452

|   |           |           |           |
|---|-----------|-----------|-----------|
| C | -2.119373 | -1.112694 | 0.079141  |
| H | -2.557492 | -1.561866 | 0.971778  |
| C | -2.977460 | 0.075174  | -0.297927 |
| C | -2.531655 | 1.017464  | -1.229118 |
| H | -1.521158 | 0.963910  | -1.625200 |
| C | -3.392631 | 2.049866  | -1.585085 |
| H | -3.073399 | 2.804428  | -2.297843 |
| C | -4.660622 | 2.098360  | -1.011060 |
| H | -5.365958 | 2.884378  | -1.259164 |
| C | -5.008921 | 1.106189  | -0.097664 |
| H | -5.988857 | 1.108210  | 0.374049  |
| C | -2.170852 | -2.130900 | -1.058072 |
| H | -3.223673 | -2.405814 | -1.182102 |
| H | -1.844215 | -1.648462 | -1.989274 |
| C | 1.440551  | -0.800235 | -0.135585 |
| H | 2.301861  | -0.943482 | 0.525530  |
| C | 1.878874  | -1.370988 | -1.530263 |
| C | 0.753741  | -1.347671 | -2.569701 |
| H | 1.178506  | -1.569145 | -3.555004 |
| H | 0.270406  | -0.368392 | -2.622021 |
| H | 0.014694  | -2.121924 | -2.360648 |
| C | 2.333450  | -2.824989 | -1.343653 |
| H | 1.539972  | -3.450308 | -0.925941 |
| H | 3.211672  | -2.892328 | -0.691565 |
| H | 2.605651  | -3.244835 | -2.317614 |
| C | 3.078706  | -0.582028 | -2.084681 |
| H | 3.884471  | -0.494841 | -1.349031 |
| H | 2.791843  | 0.425036  | -2.401193 |
| H | 3.465536  | -1.112035 | -2.960962 |
| C | 0.500098  | -1.932442 | 1.900138  |
| C | 1.543507  | -3.055816 | 1.882945  |
| H | 1.205440  | -3.895001 | 1.267877  |
| H | 1.681313  | -3.418730 | 2.905310  |
| H | 2.520574  | -2.728868 | 1.519135  |
| C | -0.799963 | -2.521087 | 2.457926  |
| H | -1.529821 | -1.737303 | 2.673346  |
| H | -0.574735 | -3.025589 | 3.401962  |
| H | -1.240827 | -3.251616 | 1.773517  |
| C | 0.952066  | -0.806341 | 2.835796  |

|   |           |           |           |
|---|-----------|-----------|-----------|
| H | 1.904324  | -0.356854 | 2.539667  |
| H | 1.077366  | -1.221622 | 3.840726  |
| H | 0.203758  | -0.013132 | 2.879790  |
| C | 3.226400  | 2.780446  | -0.179212 |
| H | 2.803330  | 3.142566  | -1.122467 |
| H | 2.822224  | 3.382590  | 0.643279  |
| C | 4.739629  | 2.814931  | -0.199683 |
| H | 5.144482  | 2.433504  | 0.740989  |
| H | 5.090030  | 3.840991  | -0.341057 |
| H | 5.120952  | 2.199695  | -1.018858 |
| C | -0.618898 | 2.202817  | 1.332067  |
| H | -1.295407 | 1.417123  | 1.684050  |
| H | -0.960834 | 2.538950  | 0.349300  |
| C | -0.527650 | 3.348327  | 2.318499  |
| H | -0.152505 | 2.995685  | 3.283110  |
| H | -1.517802 | 3.787656  | 2.469112  |
| H | 0.146033  | 4.124876  | 1.946394  |
| N | 0.280655  | -1.507290 | 0.465361  |
| O | -0.815464 | -0.576382 | 0.388006  |
| O | -1.455347 | -3.316448 | -0.796806 |
| H | -0.583835 | -3.029030 | -0.473996 |
| O | 0.627574  | 1.643000  | -1.384496 |
| O | 2.824558  | 1.413578  | 0.014793  |
| O | 0.694398  | 1.632674  | 1.203312  |
| P | 1.265348  | 1.052176  | -0.178691 |
| N | -4.191209 | 0.112614  | 0.260073  |

### RR/SS-6- Conf A

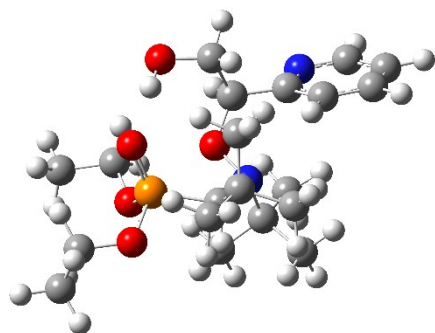

ZPE = 0.550960

E = -1610.294571

H = -1610.293627

G = -1610.387831

|   |          |           |           |
|---|----------|-----------|-----------|
| C | 1.610639 | -1.314147 | -0.718962 |
| H | 1.618250 | -2.368235 | -0.421676 |
| C | 2.991201 | -0.775539 | -0.411729 |
| C | 5.125585 | -1.312979 | 0.240120  |
| H | 5.807485 | -2.094596 | 0.566807  |
| C | 5.567569 | 0.001108  | 0.106368  |
| H | 6.595854 | 0.260263  | 0.334329  |
| C | 4.654659 | 0.955748  | -0.331323 |
| H | 4.952728 | 1.992159  | -0.458810 |
| C | 3.349240 | 0.562679  | -0.603121 |
| H | 2.606455 | 1.282665  | -0.918514 |

|   |           |           |           |
|---|-----------|-----------|-----------|
| C | 1.352934  | -1.272678 | -2.229516 |
| H | 1.401235  | -0.242341 | -2.598949 |
| H | 2.173054  | -1.826634 | -2.701432 |
| C | -0.709225 | 1.199764  | 0.197619  |
| H | -1.146637 | 1.655639  | 1.092606  |
| C | -1.697182 | -2.581274 | 0.215201  |
| H | -1.238052 | -2.544936 | -0.774656 |
| H | -0.927492 | -2.867902 | 0.939111  |
| C | -2.882841 | -3.523300 | 0.245763  |
| H | -3.342691 | -3.540210 | 1.237939  |
| H | -2.560209 | -4.537468 | -0.006276 |
| H | -3.633858 | -3.209025 | -0.485126 |
| C | -4.621634 | 0.288000  | -0.156725 |
| H | -5.205990 | 1.110304  | -0.578043 |
| H | -4.532083 | -0.490251 | -0.922774 |
| C | -5.244572 | -0.245880 | 1.117768  |
| H | -4.629570 | -1.049621 | 1.529026  |
| H | -6.246388 | -0.634482 | 0.911709  |
| H | -5.326903 | 0.549194  | 1.863325  |
| C | 0.723784  | 0.395694  | 2.085338  |
| C | -0.460746 | -0.273564 | 2.796229  |
| H | -1.410739 | 0.246509  | 2.643108  |
| H | -0.260600 | -0.284294 | 3.872103  |
| H | -0.582410 | -1.303889 | 2.458714  |
| C | 0.948250  | 1.799821  | 2.656071  |
| H | 1.798072  | 2.285310  | 2.168866  |
| H | 1.171379  | 1.709266  | 3.723189  |
| H | 0.072681  | 2.447453  | 2.561295  |
| C | 1.976616  | -0.428659 | 2.392510  |
| H | 1.916075  | -1.433873 | 1.968517  |
| H | 2.064900  | -0.527602 | 3.478660  |
| H | 2.881763  | 0.060528  | 2.024437  |
| C | -0.522059 | 2.388320  | -0.812054 |
| C | 0.068785  | 1.973094  | -2.161341 |
| H | 0.079643  | 2.844481  | -2.825390 |
| H | -0.515528 | 1.183250  | -2.638496 |
| H | 1.101227  | 1.640456  | -2.051319 |
| C | 0.421530  | 3.415686  | -0.172401 |
| H | 1.384550  | 2.963830  | 0.080203  |
| H | -0.007997 | 3.848913  | 0.737355  |
| H | 0.599071  | 4.231986  | -0.880428 |
| C | -1.869632 | 3.083397  | -1.069989 |
| H | -2.390441 | 3.321045  | -0.136679 |
| H | -2.534628 | 2.470847  | -1.684877 |
| H | -1.683182 | 4.018737  | -1.607853 |
| N | 0.555677  | 0.525230  | 0.586159  |
| O | 0.489017  | -0.793019 | 0.033908  |
| O | 0.156058  | -1.903589 | -2.594640 |
| H | -0.598426 | -1.309766 | -2.418979 |
| O | -2.016389 | -0.345475 | -1.804917 |
| O | -2.155129 | -1.269027 | 0.599123  |
| O | -3.318012 | 0.835442  | 0.128572  |
| P | -2.026221 | 0.010277  | -0.355141 |
| N | 3.873027  | -1.699268 | -0.009762 |

**RR/SS-6- Conf B**

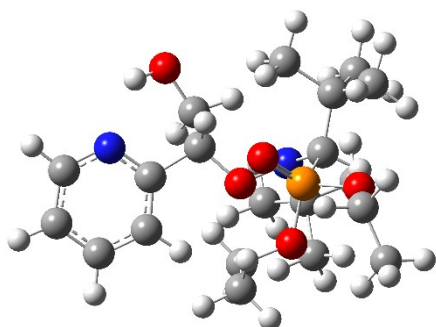

ZPE = 0.551427  
 E = -1610.296452  
 H = -1610.295508  
 G = -1610.391491

|   |           |           |           |
|---|-----------|-----------|-----------|
| C | -1.700444 | -0.657157 | -0.508405 |
| H | -1.254606 | -0.508030 | -1.499527 |
| C | -2.846661 | 0.319943  | -0.356361 |
| C | -4.799229 | 1.081585  | -1.298417 |
| H | -5.484482 | 1.027983  | -2.140642 |
| C | -5.055914 | 1.931396  | -0.225952 |
| H | -5.940745 | 2.557975  | -0.222535 |
| C | -4.153409 | 1.938908  | 0.833376  |
| H | -4.322451 | 2.574695  | 1.697572  |
| C | -3.032285 | 1.116637  | 0.775420  |
| H | -2.306931 | 1.081452  | 1.580022  |
| C | -2.267037 | -2.089922 | -0.437515 |
| H | -1.452455 | -2.790597 | -0.245674 |
| H | -2.989595 | -2.163447 | 0.389803  |
| C | 1.491413  | -1.004529 | 0.035857  |
| H | 2.320369  | -1.095755 | 0.748929  |
| C | 0.054998  | 2.607618  | 0.656586  |
| H | -0.654495 | 2.214339  | -0.074396 |
| H | -0.413524 | 2.602262  | 1.646204  |
| C | 0.513168  | 3.999907  | 0.269880  |
| H | 1.251046  | 4.379919  | 0.981806  |
| H | -0.340591 | 4.684178  | 0.255808  |
| H | 0.954319  | 3.984359  | -0.731003 |
| C | 3.734756  | 2.193044  | -0.912641 |
| H | 4.526778  | 1.940461  | -1.623141 |
| H | 2.972195  | 2.766976  | -1.451210 |
| C | 4.277612  | 2.956428  | 0.279294  |
| H | 3.474922  | 3.162173  | 0.991523  |
| H | 4.715537  | 3.904374  | -0.047702 |
| H | 5.050149  | 2.371878  | 0.785472  |
| C | 0.292594  | -1.531110 | 2.213246  |
| C | 0.678687  | -0.246046 | 2.955242  |
| H | 1.678872  | 0.101484  | 2.681382  |
| H | 0.664934  | -0.433197 | 4.033675  |
| H | -0.028261 | 0.556203  | 2.730409  |
| C | 1.286039  | -2.643040 | 2.563759  |
| H | 1.021377  | -3.582120 | 2.073038  |
| H | 1.251372  | -2.802065 | 3.645524  |
| H | 2.319117  | -2.392894 | 2.308312  |
| C | -1.095288 | -1.991177 | 2.672821  |

|   |           |           |           |
|---|-----------|-----------|-----------|
| H | -1.856526 | -1.234747 | 2.467512  |
| H | -1.078272 | -2.175640 | 3.751016  |
| H | -1.377498 | -2.920610 | 2.169145  |
| C | 1.823091  | -1.989729 | -1.146205 |
| C | 0.769333  | -1.991628 | -2.261096 |
| H | 1.115434  | -2.652716 | -3.063336 |
| H | 0.622260  | -0.993554 | -2.681202 |
| H | -0.190391 | -2.384785 | -1.918117 |
| C | 1.908595  | -3.410128 | -0.572998 |
| H | 0.957647  | -3.706483 | -0.122244 |
| H | 2.700916  | -3.499534 | 0.178907  |
| H | 2.132579  | -4.112080 | -1.382834 |
| C | 3.185974  | -1.648867 | -1.770561 |
| H | 3.967284  | -1.535476 | -1.011846 |
| H | 3.147617  | -0.727650 | -2.358250 |
| H | 3.474543  | -2.462757 | -2.443585 |
| N | 0.230631  | -1.358505 | 0.725476  |
| O | -0.741180 | -0.338096 | 0.498445  |
| O | -2.853207 | -2.446331 | -1.667393 |
| H | -3.412523 | -1.707692 | -1.955758 |
| O | 0.884435  | 1.145890  | -1.739608 |
| O | 1.184234  | 1.725491  | 0.755879  |
| O | 3.177142  | 0.940546  | -0.475344 |
| P | 1.575303  | 0.769547  | -0.480529 |
| N | -3.723889 | 0.294951  | -1.368751 |

### RR/SS-6- Conf C

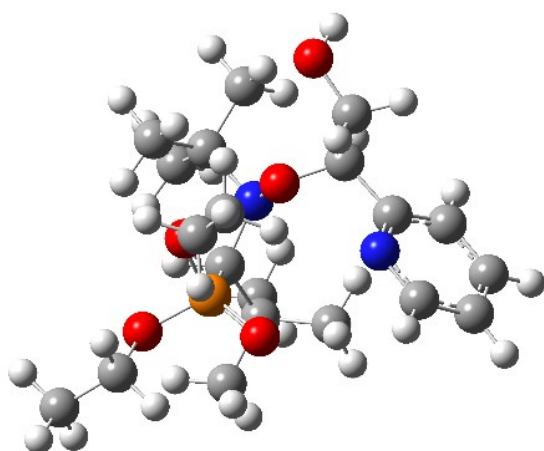

ZPE = 0.549839  
E = -1610.289962  
H = -1610.289017  
G = -1610.384957

|   |           |           |           |
|---|-----------|-----------|-----------|
| C | -2.284207 | 0.753762  | -0.324825 |
| H | -2.689714 | 1.425071  | 0.441295  |
| C | -2.667245 | -0.681917 | -0.021783 |
| C | -2.369856 | -2.878154 | -0.590050 |
| H | -1.851455 | -3.590750 | -1.226797 |
| C | -3.255913 | -3.310913 | 0.395755  |
| H | -3.440572 | -4.370051 | 0.538661  |
| C | -3.893088 | -2.352439 | 1.178935  |

|   |           |           |           |
|---|-----------|-----------|-----------|
| H | -4.596576 | -2.646858 | 1.951972  |
| C | -3.593529 | -1.010519 | 0.968434  |
| H | -4.038314 | -0.231273 | 1.580991  |
| C | -2.864589 | 1.063794  | -1.712698 |
| H | -2.362868 | 0.407651  | -2.428072 |
| H | -3.929214 | 0.793793  | -1.705884 |
| C | 0.914182  | 0.428614  | 1.043753  |
| H | 1.803094  | 1.044059  | 1.219825  |
| C | 0.430943  | -0.063812 | -2.775254 |
| H | -0.323654 | -0.734588 | -2.354654 |
| H | -0.042288 | 0.887677  | -3.039301 |
| C | 1.135100  | -0.694374 | -3.959760 |
| H | 1.926068  | -0.038980 | -4.335256 |
| H | 0.420290  | -0.876021 | -4.768266 |
| H | 1.576813  | -1.651529 | -3.666826 |
| C | 3.911904  | -1.390773 | -0.858083 |
| H | 3.531195  | -2.414669 | -0.775509 |
| H | 3.881131  | -1.089722 | -1.912447 |
| C | 5.310071  | -1.269137 | -0.290116 |
| H | 5.666201  | -0.238732 | -0.366649 |
| H | 5.996873  | -1.918745 | -0.839939 |
| H | 5.317774  | -1.563479 | 0.762701  |
| C | 0.157396  | 2.785163  | 0.629819  |
| C | 1.047374  | 3.022173  | -0.594545 |
| H | 2.000011  | 2.488193  | -0.520345 |
| H | 1.264943  | 4.091923  | -0.679226 |
| H | 0.540416  | 2.694089  | -1.504466 |
| C | 0.863524  | 3.288728  | 1.893943  |
| H | 0.238150  | 3.154629  | 2.779717  |
| H | 1.048664  | 4.359550  | 1.768435  |
| H | 1.832590  | 2.817226  | 2.073796  |
| C | -1.129676 | 3.600198  | 0.484046  |
| H | -1.628583 | 3.363325  | -0.454968 |
| H | -0.882128 | 4.666038  | 0.476993  |
| H | -1.802500 | 3.410000  | 1.327621  |
| C | 0.743721  | -0.446212 | 2.334331  |
| C | -0.505576 | -1.324798 | 2.274206  |
| H | -0.539427 | -1.966224 | 3.162519  |
| H | -0.510737 | -1.960022 | 1.384097  |
| H | -1.399633 | -0.698697 | 2.281857  |
| C | 0.608328  | 0.481914  | 3.548105  |
| H | -0.259519 | 1.138331  | 3.442002  |
| H | 1.503653  | 1.096684  | 3.693598  |
| H | 0.468008  | -0.123769 | 4.450124  |
| C | 1.982530  | -1.329796 | 2.555962  |
| H | 2.905019  | -0.739490 | 2.544943  |
| H | 2.065604  | -2.113931 | 1.797987  |
| H | 1.896011  | -1.814248 | 3.534290  |
| N | -0.233106 | 1.338451  | 0.800061  |
| O | -0.874068 | 0.936499  | -0.419645 |
| O | -2.673683 | 2.387966  | -2.163639 |
| H | -3.347442 | 2.958741  | -1.779227 |
| O | 0.930121  | -1.973113 | -0.522434 |
| O | 1.409611  | 0.248435  | -1.764617 |
| O | 3.057005  | -0.516629 | -0.104969 |
| P | 1.468751  | -0.595113 | -0.403431 |
| N | -2.096807 | -1.593135 | -0.811882 |

## RR/SS-9-conf C

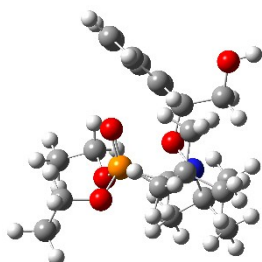

ZPE = 0.562123

E = -1594.246515

H = -1594.245571

G = -1594.341076

|   |           |           |           |
|---|-----------|-----------|-----------|
| C | -1.497487 | -1.114304 | -0.541991 |
| H | -1.005239 | -0.967506 | -1.506521 |
| C | -2.686949 | -0.186450 | -0.477060 |
| C | -2.982853 | 0.644786  | -1.556639 |
| H | -2.348522 | 0.612961  | -2.437963 |
| C | -4.056468 | 1.532243  | -1.488701 |
| H | -4.278445 | 2.176816  | -2.333658 |
| C | -4.835233 | 1.600085  | -0.335080 |
| H | -5.668380 | 2.294209  | -0.279638 |
| C | -4.542161 | 0.772193  | 0.749635  |
| H | -5.145251 | 0.821388  | 1.651304  |
| C | -3.474564 | -0.118355 | 0.675221  |
| H | -3.239427 | -0.752146 | 1.527149  |
| C | -1.879666 | -2.584711 | -0.413438 |
| H | -0.967225 | -3.182551 | -0.296687 |
| H | -2.518847 | -2.736309 | 0.468018  |
| C | 1.670964  | -0.726145 | -0.054253 |
| H | 2.512036  | -0.603802 | 0.640845  |
| C | -0.736931 | 2.232645  | 0.881363  |
| H | -1.196647 | 2.149749  | -0.107021 |
| H | -1.266779 | 1.558682  | 1.560795  |
| C | -0.745061 | 3.661542  | 1.383099  |
| H | -0.254651 | 3.734608  | 2.358123  |
| H | -1.776680 | 4.011177  | 1.484318  |
| H | -0.224254 | 4.319330  | 0.680625  |
| C | 2.822548  | 3.058843  | -0.783985 |
| H | 3.587399  | 3.147352  | -1.560397 |
| H | 1.881037  | 3.441525  | -1.194570 |
| C | 3.222476  | 3.797400  | 0.478341  |
| H | 2.449052  | 3.684426  | 1.241759  |
| H | 3.359877  | 4.861843  | 0.264850  |
| H | 4.161759  | 3.397756  | 0.869521  |
| C | 0.754034  | -1.667419 | 2.108027  |
| C | 0.880235  | -0.359858 | 2.899547  |
| H | 1.756304  | 0.221131  | 2.596100  |
| H | 0.980090  | -0.592016 | 3.964637  |
| H | -0.003969 | 0.265241  | 2.759720  |
| C | 1.992143  | -2.533551 | 2.355940  |
| H | 1.913172  | -3.496687 | 1.846744  |
| H | 2.067187  | -2.721587 | 3.430996  |
| H | 2.921667  | -2.048496 | 2.047432  |



|   |           |           |           |
|---|-----------|-----------|-----------|
| C | -0.464944 | -2.448493 | 2.608036  |
| H | -1.379397 | -1.860160 | 2.508633  |
| H | -0.329387 | -2.694488 | 3.665473  |
| H | -0.578422 | -3.382973 | 2.049887  |
| C | 2.238637  | -1.523269 | -1.287214 |
| C | 1.186461  | -1.825431 | -2.360629 |
| H | 1.674327  | -2.352124 | -3.188335 |
| H | 0.735284  | -0.911784 | -2.755882 |
| H | 0.402030  | -2.482763 | -1.974840 |
| C | 2.783907  | -2.866098 | -0.783206 |
| H | 1.989448  | -3.459444 | -0.322771 |
| H | 3.594069  | -2.733151 | -0.057918 |
| H | 3.182867  | -3.433110 | -1.630789 |
| C | 3.398353  | -0.756940 | -1.943418 |
| H | 4.138692  | -0.430482 | -1.205853 |
| H | 3.049973  | 0.126703  | -2.484947 |
| H | 3.893732  | -1.418276 | -2.661874 |
| N | 0.574897  | -1.451558 | 0.633222  |
| O | -0.627061 | -0.681507 | 0.513140  |
| O | -2.563197 | -2.907575 | -1.611835 |
| H | -2.869316 | -3.818653 | -1.570682 |
| O | 0.401110  | 1.215010  | -1.705692 |
| O | 0.632661  | 1.794085  | 0.808114  |
| O | 2.694971  | 1.652195  | -0.505697 |
| P | 1.212269  | 1.020304  | -0.476330 |

### RS/SR-9-Conf A

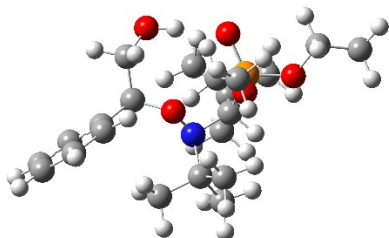

ZPE = 0.562256

E = -1594.253395

H = -1594.252451

G = -1594.347854

|   |           |           |           |
|---|-----------|-----------|-----------|
| C | -1.783035 | -0.217483 | -1.112295 |
| H | -1.686456 | -1.268158 | -1.400147 |
| C | -3.183424 | 0.057436  | -0.610852 |
| C | -3.510156 | 1.295198  | -0.048498 |
| H | -2.733898 | 2.043789  | 0.087388  |
| C | -4.810753 | 1.562909  | 0.369735  |
| H | -5.048114 | 2.524342  | 0.815079  |
| C | -5.806859 | 0.597431  | 0.218577  |
| H | -6.820742 | 0.804158  | 0.546695  |
| C | -5.493514 | -0.631912 | -0.357006 |
| H | -6.263095 | -1.387818 | -0.479585 |

|   |           |           |           |
|---|-----------|-----------|-----------|
| C | -4.188759 | -0.896258 | -0.771456 |
| H | -3.944123 | -1.860298 | -1.211604 |
| C | -1.532378 | 0.685510  | -2.330153 |
| H | -2.413146 | 0.612958  | -2.976875 |
| H | -1.480910 | 1.727443  | -1.971434 |
| C | 1.237782  | -1.057439 | 0.305837  |
| H | 1.748194  | -1.204576 | 1.264284  |
| C | 1.712306  | -2.238952 | -0.616965 |
| C | 1.081313  | -2.206270 | -2.009873 |
| H | 1.399015  | -3.098377 | -2.561293 |
| H | 1.384385  | -1.328177 | -2.580004 |
| H | -0.008954 | -2.222281 | -1.956047 |
| C | 1.313749  | -3.558893 | 0.056389  |
| H | 0.229380  | -3.621704 | 0.179723  |
| H | 1.789970  | -3.677712 | 1.035848  |
| H | 1.634135  | -4.394021 | -0.574801 |
| C | 3.241761  | -2.230627 | -0.772211 |
| H | 3.750678  | -2.188947 | 0.196747  |
| H | 3.587159  | -1.386220 | -1.376233 |
| H | 3.545987  | -3.150654 | -1.281958 |
| C | -0.631727 | -1.021375 | 1.991007  |
| C | -0.034622 | -2.233710 | 2.719241  |
| H | -0.360422 | -3.169487 | 2.259853  |
| H | -0.398739 | -2.216594 | 3.750204  |
| H | 1.056699  | -2.227502 | 2.767913  |
| C | -2.152704 | -1.172666 | 2.066789  |
| H | -2.668968 | -0.258966 | 1.775821  |
| H | -2.438479 | -1.403374 | 3.097524  |
| H | -2.491771 | -1.989068 | 1.421221  |
| C | -0.216494 | 0.265579  | 2.710473  |
| H | 0.869877  | 0.383503  | 2.764688  |
| H | -0.607890 | 0.243837  | 3.732745  |
| H | -0.631068 | 1.138727  | 2.200426  |
| C | 4.369903  | 1.426342  | 0.005059  |
| H | 4.380697  | 1.508300  | -1.086849 |
| H | 4.079600  | 2.394874  | 0.429314  |
| C | 5.706545  | 0.963621  | 0.543576  |
| H | 5.669693  | 0.870072  | 1.631713  |
| H | 6.486021  | 1.683635  | 0.279876  |
| H | 5.970087  | -0.008244 | 0.118291  |
| C | 0.441343  | 2.771237  | 0.145990  |
| H | -0.581239 | 2.445263  | 0.358244  |
| H | 0.573375  | 2.834464  | -0.938915 |
| C | 0.762637  | 4.084450  | 0.828101  |
| H | 0.661146  | 3.986350  | 1.912272  |
| H | 0.075814  | 4.861782  | 0.481315  |
| H | 1.785066  | 4.397483  | 0.600654  |
| N | -0.223256 | -1.063645 | 0.542589  |
| O | -0.764798 | 0.078965  | -0.135757 |
| O | -0.422582 | 0.338252  | -3.098918 |
| H | 0.398477  | 0.590569  | -2.635345 |
| O | 1.882621  | 0.898533  | -1.690933 |
| O | 3.385666  | 0.447716  | 0.385589  |
| O | 1.332363  | 1.773983  | 0.669824  |
| P | 1.908113  | 0.579452  | -0.233473 |

## Ethyl radicals

### 2-hydroxy-1-phenyl-ethyl radical

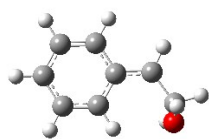

$$\langle S^2 \rangle = 0.773086$$

$$\text{ZPE} = 0.144618$$

$$E = -385.135267$$

$$H = -385.134323$$

$$G = -385.177622$$

|   |           |           |           |
|---|-----------|-----------|-----------|
| C | 0.008128  | 0.085885  | -0.067950 |
| H | -0.031318 | 0.334986  | 0.988927  |
| C | 1.284538  | 0.008373  | -0.690128 |
| C | 1.434240  | -0.330027 | -2.059790 |
| H | 0.547916  | -0.489495 | -2.665491 |
| C | 2.695269  | -0.429400 | -2.628630 |
| H | 2.789529  | -0.690190 | -3.678435 |
| C | 3.842148  | -0.190977 | -1.865984 |
| H | 4.825235  | -0.267874 | -2.319104 |
| C | 3.715356  | 0.152216  | -0.515945 |
| H | 4.601740  | 0.339940  | 0.082336  |
| C | 2.460939  | 0.251117  | 0.063503  |
| H | 2.365486  | 0.513075  | 1.114305  |
| C | -1.275415 | -0.203113 | -0.779988 |
| H | -1.266394 | -1.217414 | -1.199135 |
| H | -2.113380 | -0.146983 | -0.074587 |
| O | -1.510768 | 0.647498  | -1.901134 |
| H | -1.380864 | 1.561754  | -1.622784 |

### 1-phenyl-ethyl radical

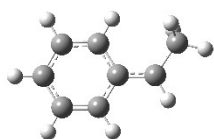

$$\langle S^2 \rangle = 0.774144$$

$$\text{ZPE} = 0.139099$$

$$E = -309.951313$$

$$H = -309.950369$$

$$G = -309.991108$$

|   |          |           |           |
|---|----------|-----------|-----------|
| C | 0.008794 | -0.060898 | 0.048592  |
| H | 0.013298 | -0.146456 | 1.130999  |
| C | 1.263470 | -0.017572 | -0.614650 |
| C | 1.365856 | 0.094758  | -2.024768 |

|   |           |           |           |
|---|-----------|-----------|-----------|
| H | 0.462397  | 0.150466  | -2.624520 |
| C | 2.604788  | 0.134642  | -2.648394 |
| H | 2.657918  | 0.221021  | -3.729657 |
| C | 3.781616  | 0.064844  | -1.898607 |
| H | 4.747628  | 0.096479  | -2.391830 |
| C | 3.704156  | -0.046179 | -0.505697 |
| H | 4.613691  | -0.100974 | 0.085129  |
| C | 2.472296  | -0.086749 | 0.125517  |
| H | 2.417798  | -0.173082 | 1.207846  |
| C | -1.303691 | 0.006210  | -0.661007 |
| H | -1.405599 | 0.936920  | -1.235783 |
| H | -1.419981 | -0.819687 | -1.376168 |
| H | -2.135834 | -0.043431 | 0.043318  |

### 2-hydroxy-1-pyridyl-ethyl radical

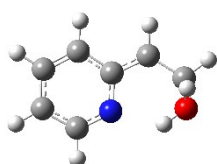

$\langle S^2 \rangle = 0.773281$

ZPE = 0.133853

E = -401.187800

H = -401.186856

G = -401.229270

|   |           |           |           |
|---|-----------|-----------|-----------|
| C | 0.011685  | -0.029885 | 0.042396  |
| H | -0.022935 | -0.069537 | 1.126627  |
| C | 1.284711  | -0.019744 | -0.589858 |
| C | 2.488349  | 0.089976  | -2.558009 |
| H | 2.461529  | 0.152469  | -3.643701 |
| C | 3.714040  | 0.045257  | -1.888638 |
| H | 4.642876  | 0.073676  | -2.446685 |
| C | 3.699852  | -0.042348 | -0.495030 |
| H | 4.628839  | -0.081956 | 0.065599  |
| C | 2.483203  | -0.076544 | 0.162100  |
| H | 2.430194  | -0.141908 | 1.244363  |
| C | -1.266008 | 0.072157  | -0.736324 |
| H | -2.118032 | -0.105683 | -0.075971 |
| H | -1.362403 | 1.099847  | -1.127061 |
| O | -1.366010 | -0.865299 | -1.788763 |
| H | -0.596126 | -0.711441 | -2.357237 |
| N | 1.308963  | 0.058161  | -1.949851 |

### 1-pyridyl-ethyl radical

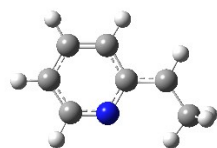

$\langle S^2 \rangle = 0.77419$

ZPE = 0.127709  
 E = -326.000563  
 H = -325.999619  
 G = -326.040809

|   |           |           |           |
|---|-----------|-----------|-----------|
| C | 0.030176  | 0.024197  | 0.021162  |
| H | 0.020040  | 0.024441  | 1.107801  |
| C | 1.299774  | 0.006314  | -0.616848 |
| C | 2.528630  | -0.003120 | -2.565626 |
| H | 2.516938  | 0.002842  | -3.653998 |
| C | 3.748513  | -0.026089 | -1.882422 |
| H | 4.683917  | -0.038022 | -2.430293 |
| C | 3.716531  | -0.033220 | -0.485694 |
| H | 4.637529  | -0.051031 | 0.089497  |
| C | 2.491402  | -0.017024 | 0.154053  |
| H | 2.424915  | -0.021571 | 1.237868  |
| C | -1.267100 | 0.056588  | -0.704652 |
| H | -1.802198 | 0.994672  | -0.506871 |
| H | -1.107380 | -0.032098 | -1.779602 |
| H | -1.924387 | -0.754102 | -0.368613 |
| N | 1.340515  | 0.012629  | -1.976345 |

### Nitroxide 3°

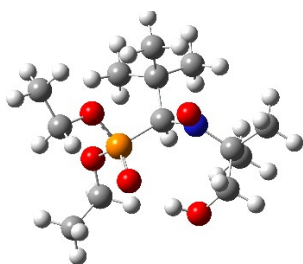

$\langle S^2 \rangle = 0.754795$   
 ZPE = 0.415912  
 E = -1284.240473  
 H = -1284.239529  
 G = -1284.323298

|   |           |           |           |
|---|-----------|-----------|-----------|
| P | -0.355547 | -0.132260 | 0.136927  |
| O | 0.146810  | 0.352274  | 2.995160  |
| O | 3.099034  | -0.104660 | 0.978078  |
| H | 2.324106  | -0.650544 | 0.747420  |
| O | 0.667470  | -1.184436 | 0.388891  |
| O | -1.854657 | -0.538264 | 0.481146  |
| O | -0.460960 | 0.248630  | -1.427004 |
| N | 0.699047  | 1.200306  | 2.215483  |
| C | 2.124158  | 1.550291  | 2.508375  |
| C | 2.646235  | 2.648748  | 1.587947  |
| H | 2.733121  | 2.302097  | 0.556185  |
| H | 3.653795  | 2.915392  | 1.920445  |
| H | 2.029009  | 3.549136  | 1.632812  |
| C | 2.178868  | 1.995861  | 3.970832  |
| H | 1.569441  | 2.892219  | 4.122548  |

|   |           |           |           |
|---|-----------|-----------|-----------|
| H | 3.211009  | 2.229309  | 4.246306  |
| H | 1.802930  | 1.207178  | 4.625374  |
| C | 2.976468  | 0.278044  | 2.324783  |
| H | 3.983745  | 0.491821  | 2.701698  |
| H | 2.536042  | -0.520443 | 2.935605  |
| C | -0.023974 | 1.481991  | 0.976886  |
| H | 0.665002  | 1.977716  | 0.282677  |
| C | -1.233406 | 2.452012  | 1.183130  |
| C | -2.186838 | 1.986695  | 2.291056  |
| H | -2.590146 | 0.993725  | 2.088371  |
| H | -3.017347 | 2.698462  | 2.354654  |
| H | -1.680617 | 1.955963  | 3.258438  |
| C | -1.997711 | 2.606956  | -0.139703 |
| H | -1.326470 | 2.884178  | -0.960050 |
| H | -2.744537 | 3.399659  | -0.029355 |
| H | -2.518085 | 1.688226  | -0.420966 |
| C | -0.668881 | 3.823930  | 1.578347  |
| H | -0.088646 | 3.762774  | 2.504993  |
| H | -1.493047 | 4.524283  | 1.746359  |
| H | -0.030580 | 4.238421  | 0.789518  |
| C | -2.305131 | -1.860710 | 0.104065  |
| H | -1.599577 | -2.592473 | 0.507059  |
| H | -2.303628 | -1.925784 | -0.989693 |
| C | -3.694098 | -2.041434 | 0.673648  |
| H | -3.670060 | -1.955730 | 1.762431  |
| H | -4.078820 | -3.029593 | 0.408307  |
| H | -4.373319 | -1.283263 | 0.276369  |
| C | 0.741427  | 0.202935  | -2.226730 |
| H | 1.615289  | 0.427490  | -1.602840 |
| H | 0.624699  | 0.999472  | -2.965210 |
| C | 0.886054  | -1.156454 | -2.881120 |
| H | 1.008224  | -1.924224 | -2.113142 |
| H | 1.763439  | -1.169043 | -3.533834 |
| H | 0.000900  | -1.382626 | -3.481182 |

### Nitroxide 6°

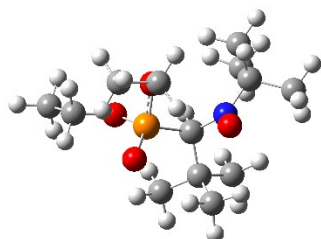

$\langle S^2 \rangle = 0.754656$   
 ZPE = 0.409605  
 E = -1209.048767  
 H = -1209.047822  
 G = -1209.129238

|   |          |          |           |
|---|----------|----------|-----------|
| P | 1.599059 | 0.345928 | -0.208899 |
|---|----------|----------|-----------|

|   |           |           |           |
|---|-----------|-----------|-----------|
| O | -1.244973 | 0.380649  | 0.452515  |
| N | -0.612175 | -0.567865 | 1.026659  |
| O | 3.049270  | -0.294727 | 0.073387  |
| O | 1.475722  | 1.418861  | 0.981452  |
| O | 1.416598  | 0.916311  | -1.564418 |
| H | 1.178823  | -1.644833 | 1.013107  |
| C | 0.553046  | -1.087352 | 0.310893  |
| C | -0.935767 | -0.796660 | 2.469462  |
| H | -0.431503 | -0.488035 | -2.248063 |
| H | -1.776837 | -1.214472 | -1.353047 |
| H | -0.991758 | -2.127022 | -2.657953 |
| C | 0.175741  | -2.053524 | -0.854450 |
| C | -0.818991 | -1.422827 | -1.836232 |
| H | 1.876896  | -1.608045 | -2.156592 |
| H | 1.219252  | -3.241920 | -2.323276 |
| H | 2.221646  | -2.833929 | -0.916320 |
| H | -1.285273 | 1.312867  | 2.800075  |
| H | 0.378971  | 0.793647  | 3.150764  |
| H | -0.938884 | 0.385273  | 4.279176  |
| C | 1.456802  | -2.452810 | -1.602457 |
| H | -0.063650 | 2.493933  | 0.087476  |
| H | 0.405849  | 2.960674  | 1.736548  |
| C | -0.675215 | 0.511732  | 3.224675  |
| H | -1.340023 | -3.068444 | 0.345279  |
| H | 0.264038  | -3.842354 | 0.401550  |
| H | -0.753719 | -3.998788 | -1.039977 |
| C | 0.784871  | 2.668991  | 0.753577  |
| H | -3.018070 | -0.389004 | 2.046261  |
| H | -2.733979 | -1.241299 | 3.582437  |
| H | -2.612239 | -2.119650 | 2.044035  |
| C | -0.448876 | -3.313539 | -0.242425 |
| H | 4.075140  | 0.660578  | -1.448332 |
| H | 4.245932  | 1.390699  | 0.166808  |
| C | -2.421812 | -1.161072 | 2.536941  |
| H | 6.321982  | 0.121251  | -0.457235 |
| H | 5.353024  | -1.352012 | -0.665847 |
| H | 5.522892  | -0.621950 | 0.943912  |
| C | 4.199339  | 0.442688  | -0.382739 |
| H | 1.234096  | 4.663736  | 0.087151  |
| H | 2.093094  | 3.383378  | -0.794070 |
| H | 2.599952  | 3.831756  | 0.857829  |
| C | 5.424509  | -0.406206 | -0.122789 |
| H | 0.969666  | -1.648186 | 3.120122  |
| H | -0.193311 | -2.851578 | 2.500116  |
| H | -0.435399 | -2.105171 | 4.083688  |
| C | 1.742227  | 3.700363  | 0.191612  |
| C | -0.088899 | -1.919752 | 3.063165  |

## References

---

<sup>1</sup> **2**, **2'**, and **2''** differ only by the pathway of preparation as well as **3** and **3'**.

<sup>2</sup> *RS/SR-5* exhibits 3.2 kJ/mol lower  $E_a$  than expected. A tentative rationale is a different conformation in *RS/SR-5* than in *RS/SR-2*

P. Brémond, T. Butscher, V. Roubaud, D. Siri and S. Viel, *J. Org. Chem.*, 2013, 78, 10524–10529.

<sup>4</sup> Gaussian 09, Revision A.02, Frisch, M. J.; Trucks, G. W.; Schlegel, H. B.; Scuseria, G. E.; Robb, M. A.; Cheeseman, J. R.; Scalmani, G.; Barone, V.; Mennucci, B.; Petersson, G. A.; Nakatsuji, H.; Caricato, M.; Li, X.; Hratchian, H. P.; Izmaylov, A. F.; Bloino, J.; Zheng, G.; Sonnenberg, J. L.; Hada, M.; Ehara, M.; Toyota, K.; Fukuda, R.; Hasegawa, J.; Ishida, M.; Nakajima, T.; Honda, Y.; Kitao, O.; Nakai, H.; Vreven, T.; Montgomery, J. A. Jr., Peralta, J. E.; Ogliaro, F.; Bearpark, M.; Heyd J. J.; Brothers, E.; Kudin, K. N.; Staroverov, V. N.; Kobayashi, R.; Normand, J.; Raghavachari, K.; Rendell, A., Burant, J. C.; Iyengar, S. S., Tomasi, J.; Cossi, M.; Rega, N.; Millam, J. M.; Klene, M.; Knox, J. E.; Cross, J. B.; Bakken, V.; Adamo, C.; Jaramillo, J.; Gomperts, R.; Stratmann, R. E.; Yazyev, O.; Austin, A. J.; Cammi, R.; Pomelli, C.; Ochterski, J. W.; Martin, R. L.; Morokuma, K.; Zakrzewski, V. G.; Voth, G. A.; Salvador, P.; Dannenberg, J. J.; Dapprich, S.; Daniels, A. D.; Farkas, Ö.; Foresman, J. B.; Ortiz, J. V.; Cioslowski, J.; Fox, D. J. Gaussian, Inc., Wallingford CT, 2009.
